# Supplementary material for: Annexin A1 contributes to pancreatic cancer cell phenotype, behaviour and metastatic potential independently of Formyl Peptide Receptor pathway
Source: PubMed Central journal article supplement (PMC4944142; doi:10.1038/srep29660), 2016-07-14
Supplement: srep29660-s1.pdf [file srep29660-s1.pdf]

## SUPPLEMENTARY INFORMATION

***Annexin A1 contributes to pancreatic cancer cell phenotype, behaviour and metastatic potential independently of Formyl Peptide Receptor pathway.***

Raffaella Belvedere, Valentina Bizzarro, Giovanni Forte, Fabrizio Dal Piaz, Luca Parente & Antonello Petrella \*.

Department of Pharmacy, University of Salerno, via Giovanni Paolo II 132, 84084 Fisciano (SA) Italy.

**\* Corresponding Author:**

**Antonello Petrella, Associate Professor, Department of Pharmacy, University of Salerno, Via Giovanni Paolo II, 132 - 84084 Fisciano (Salerno), Italy.**

**Phone: +39 089 969762; Fax: +39 089 969602; e-mail: [apetrella@unisa.it](mailto:apetrella@unisa.it)**

**Supplementary tables from S1 to S5.**

All the dysregulated proteins revealed by LC-MS/MS in ANXA1 KO MIA PaCa-2 grouped according to the pathways in which they are involved.

**Table S1:** Proteins involved in cell proliferation and identified as differentially expressed in ANXA1 KO MIA PaCa-2 cells by LC-MS/MS

| <b>Cell Proliferation</b> |           |                                            |                          |                                  |          |
|---------------------------|-----------|--------------------------------------------|--------------------------|----------------------------------|----------|
| PROTEIN ID <sup>a</sup>   | GENE NAME | PROTEIN NAME <sup>b</sup>                  | FOLD CHANGE <sup>c</sup> | BIOLOGICAL FUNCTION <sup>d</sup> | p VALUE  |
| B5MCX3                    | SEPT2     | Septin-2                                   | 0                        | Cell division                    | 0.019908 |
| Q08945                    | SSRP1     | FACT complex subunit SSRP1                 | 0                        | Chromatin remodeling             | 0.020796 |
| P13010                    | XRCC5     | X-ray repair cross-complementing protein 5 | 2.301589853              | Cell proliferation               | 0.038707 |
| P23396                    | RPS3      | 40S ribosomal protein S3                   | 2.127076489              | Cell division                    | 0.008957 |
| Q8N163                    | KIAA1967  | DBIRD complex subunit KIAA1967             | 0.431186                 | Cell cycle                       | 0.025403 |
| P12270                    | TPR       | Nucleoprotein TPR                          | 0.517343                 | Cell division                    | 0.006167 |
| P55072                    | VCP       | Transitional endoplasmic reticulum ATPase  | 0.614778                 | Mitosis-associated vesiculation  | 0.010769 |

a UniProtKB Accession Numbers;

b Protein acrostic names according UniProtKB;

c Average ratio between the ANXA1 KO and PGS MIA PaCa-2 cells are reported;

d Protein function according to UniProtKB;

 = upregulated proteins

 = downregulated proteins

**Table S2:** Proteins involved in cell trafficking and identified as differentially expressed in ANXA1 KO MIA PaCa-2 cells by LC-MS/MS

| PROTEIN ID <sup>a</sup> | GENE NAME | PROTEIN NAME <sup>b</sup>                           | FOLD CHANGE <sup>c</sup> | BIOLOGICAL FUNCTION <sup>d</sup> | p VALUE  |
|-------------------------|-----------|-----------------------------------------------------|--------------------------|----------------------------------|----------|
| Q15758                  | SLC1A5    | Neutral amino acid transporter B(0)                 | 6.064931411              | Amino acid transport             | 0.046059 |
| Q9UBS4                  | DNAJB11   | DnaJ homolog subfamily B member 11                  | 0                        | Co-chaperone                     | 0.007254 |
| P27797                  | CALR      | Calreticulin                                        | 0.566725                 | Calcium binding chaperone        | 0.024343 |
| Q09666                  | AHNAK     | Neuroblast differentiation-associated protein AHNAK | 0.604693                 | Protein oligomerization          | 0.000977 |

a UniProtKB Accession Numbers;

b Protein acrostic names according UniProtKB;

c Average ratio between the ANXA1 KO and PGS MIA PaCa-2 cells are reported;

d Protein function according to UniProtKB;

 = upregulated proteins

 = downregulated proteins

**Table S3:** Proteins involved in metabolic processes and identified as differentially expressed in ANXA1 KO MIA PaCa-2 cells by LC-MS/MS

| PROTEIN ID <sup>a</sup> | GENE NAME | PROTEIN NAME <sup>b</sup>                             | FOLD CHANGE <sup>c</sup> | BIOLOGICAL FUNCTION <sup>d</sup>             | p VALUE  |
|-------------------------|-----------|-------------------------------------------------------|--------------------------|----------------------------------------------|----------|
| P19623                  | SRM       | Spermidine synthase                                   | 0                        | Polyamine metabolic process                  | 0.005564 |
| P21980                  | TGM2      | Protein-glutamine gamma-glutamyltransferase 2         | 0                        | Catalytic activity; cell adhesion            | 0.016302 |
| P23381                  | WARS      | Tryptophan--tRNA ligase                               | 0                        | Catalytic activity; anti-angiogenic activity | 0.020087 |
| P02792                  | FTL       | Ferritin light chain                                  | 1.07203065               | Cellular iron ion homeostasis                | 0.009598 |
| B4DLR8                  | NQO1      | NAD(P)H dehydrogenase [quinone] 1                     | 3.86739188               | NAD(P)H dehydrogenase                        | 3.95E-05 |
| Q9H845                  | ACAD9     | Acyl-CoA dehydrogenase family member 9, mitochondrial | 3.02919013               | Lipid homeostasis                            | 0.040886 |
| P49419-2                | ALDH7A1   | Alpha-aminoadipic semialdehyde dehydrogenase          | 2.506037792              | Cellular aldehyde metabolic process          | 0.001015 |
| P15880                  | RPS2      | 40S ribosomal protein S2                              | 2.335978055              | Cellular protein metabolic process           | 0.0118   |
| P62424                  | RPL7A     | 60S ribosomal protein L7a                             | 2.227868741              | Cellular protein metabolic process           | 0.040631 |
| P14618                  | PKM       | Pyruvate kinase                                       | 1.826774384              | Glycolysis                                   | 0.013222 |
| P30041                  | PRDX6     | Peroxiredoxin-6                                       | 1.637017035              | Antioxidant activity                         | 0.029797 |
| P23526                  | AHCY      | Adenosylhomocysteinase                                | 1.604107092              | Catalytic activity                           | 0.041839 |
| P00352                  | ALDH1A1   | Retinal dehydrogenase 1                               | 1.509394815              | Retinol metabolism                           | 0.026243 |
| P16615-5                | ATP2A2    | Sarcoplasmic/endoplasmic reticulum calcium ATPase 2   | 0                        | ATPase activity                              | 0.02673  |
| E9PKD5                  | PSMC3     | 26S protease regulatory subunit 6A                    | 0.14125                  | Proteasome activity                          | 0.034945 |
| A0A087X054              | HYOU1     | Hypoxia up-regulated protein 1                        | 0.316505                 | ATP-binding                                  | 9.27E-06 |
| P11021                  | HSPA5     | 78 kDa glucose-regulated protein                      | 0.340958                 | Protein folding and degradation              | 5.03E-06 |
| P07237                  | P4HB      | Protein disulfide-isomerase                           | 0.410515                 | Catalytic activity                           | 0.004959 |
| P30101                  | PDIA3     | Protein disulfide-isomerase A3                        | 0.631386                 | Catalytic activity                           | 0.005858 |

a UniProtKB Accession Numbers;

b Protein acrostic names according UniProtKB;

c Average ratio between the ANXA1 KO and PGS MIA PaCa-2 cells are reported;

d Protein function according to UniProtKB;

 = upregulated proteins

 = downregulated proteins

**Table S4:** Proteins involved in cytoskeletal organization and identified as differentially expressed in ANXA1 KO MIA PaCa-2 cells by LC-MS/MS

| <b>Cytoskeletal organization</b> |                  |                                          |                                |                                                                    |                |
|----------------------------------|------------------|------------------------------------------|--------------------------------|--------------------------------------------------------------------|----------------|
| <b>PROTEIN ID<sup>a</sup></b>    | <b>GENE NAME</b> | <b>PROTEIN NAME<sup>b</sup></b>          | <b>FOLD CHANGE<sup>c</sup></b> | <b>BIOLOGICAL FUNCTION<sup>d</sup></b>                             | <b>p VALUE</b> |
| P53621                           | COPA             | Coatamer subunit alpha;Xenin;Proxenin    | 7.740548847                    | Structural molecule activity                                       | 0.013284       |
| P48643-2                         | CCT5             | T-complex protein 1 subunit epsilon      | 3.47838083                     | Microtubule organization                                           | 0.035743       |
| O75369-2                         | FLNB             | Filamin-B                                | 1.579505107                    | Connection of cell membrane constituents to the actin cytoskeleton | 0.000111       |
| P43243                           | MATR3            | Matrin-3                                 | 0.303521                       | Structural molecule activity                                       | 0.017219       |
| P14625                           | HSP90B1          | Endoplasmin                              | 0.390034                       | Actin rod assembly                                                 | 0.000784       |
| P12814-2                         | ACTN1            | Alpha-actinin-1                          | 0.390837                       | Actin filament organization                                        | 0.002918       |
| Q13263                           | TRIM28           | Transcription intermediary factor 1-beta | 0.561538                       | Nucleosome remodeling                                              | 0.044216       |

a UniProtKB Accession Numbers;

b Protein acrostic names according UniProtKB;

c Average ratio between the ANXA1 KO and PGS MIA PaCa-2 cells are reported;

d Protein function according to UniProtKB;

 = upregulated proteins

 = downregulated proteins

**Table S5:** Proteins involved in other processes and identified as differentially expressed in ANXA1 KO MIA PaCa-2 cells by LC-MS/MS

| Other Processes         |           |                                                                  |                          |                                                                              |          |
|-------------------------|-----------|------------------------------------------------------------------|--------------------------|------------------------------------------------------------------------------|----------|
| PROTEIN ID <sup>a</sup> | GENE NAME | PROTEIN NAME <sup>b</sup>                                        | FOLD CHANGE <sup>c</sup> | BIOLOGICAL FUNCTION <sup>d</sup>                                             | p VALUE  |
| O43390                  | HNRNPR    | Heterogeneous nuclear ribonucleoprotein R                        | 0                        | mRNA processing, mRNA A splicing                                             | 0.023029 |
| P31942                  | HNRNPH3   | Heterogeneous nuclear ribonucleoprotein H3                       | 0                        | mRNA processing; cell differentiation                                        | 0.023057 |
| O95433                  | AHSA1     | Activator of HSP90 ATPase homolog 1                              | 6.624361944              | Stress response                                                              | 0.026754 |
| E7ER77                  | ERMP1     | Endoplasmic reticulum metalloproteinase 1                        | 4.973783186              | Metalloproteinase activity                                                   | 0.00342  |
| E9PKG1                  | PRMT1     | Protein arginine N-methyltransferase 1                           | 4.756975455              | Regulation of transcription                                                  | 0.002524 |
| P17987                  | TCP1      | T-complex protein 1 subunit alpha                                | 4.710964973              | Protein folding                                                              | 0.002887 |
| P62136                  | PPP1CA    | Serine/threonine-protein phosphatase PP1-alpha catalytic subunit | 4.398599871              | Phosphatase activity                                                         | 0.018955 |
| P78527-2                | PRKDC     | DNA-dependent protein kinase catalytic subunit                   | 2.414339969              | Serine/threonine-protein kinase; Cell lineage; Tissue development; Apoptosis | 0.000102 |
| P12956                  | XRCC6     | X-ray repair cross-complementing protein 6                       | 1.647574521              | DNA repair                                                                   | 0.041851 |
| Q13838                  | DDX39B    | Spliceosome RNA helicase DDX39B                                  | 1.492748057              | DNA repair                                                                   | 0.049003 |
| C9J9K3                  | RPSA      | 40S ribosomal protein SA                                         | 1.237329158              | Structural constituent of ribosome                                           | 0.024141 |
| Q9Y4W6                  | AFG3L2    | AFG3-like protein 2                                              | 0                        | Metalloprotease                                                              | 0.013201 |
| P35637-2                | FUS       | RNA-binding protein FUS                                          | 0                        | Cellular response to calcium ion                                             | 0.008668 |
| P08621-3                | SNRNP70   | U1 small nuclear ribonucleoprotein 70 kDa                        | 0                        | mRNA processing                                                              | 0.037021 |
| P13667                  | PDIA4     | Protein disulfide-isomerase A4                                   | 0.189525                 | Protein folding                                                              | 7.31E-08 |
| P09874                  | PARP1     | Poly [ADP-ribose] polymerase 1                                   | 0.436174                 | DNA repair                                                                   | 0.03311  |
| Q92598-2                | HSPH1     | Heat shock protein 105 kDa                                       | 0.515871                 | Stress response                                                              | 0.041804 |

a UniProtKB Accession Numbers;

b Protein acrostic names according UniProtKB;

c Average ratio between the ANXA1 KO and PGS MIA PaCa-2 cells are reported;

d Protein function according to UniProtKB;

 = upregulated proteins

 = downregulated proteins

### Supplementary Tables S6.

Raw data concerning all the dysregulated proteins revealed by LC-MS/MS in ANXA1 KO MIA PaCa-2.

**TABLE S6: Mass Spectrometry Proteomics Raw Data**

| Protein Ids                                                                     | KO I     | KO II    | KO III   | KO IV    | KO V     | KO VI    | KO VII   | KO VIII  | PGS I    | PGS II   | PGS III  | PGS IV   | PGS V    | PGS VI   | PGS VII  | PGS VIII | Mean     | Mean KO  | Mean PGS | SD       | SD KO    | SD PGS   | p value  |          |
|---------------------------------------------------------------------------------|----------|----------|----------|----------|----------|----------|----------|----------|----------|----------|----------|----------|----------|----------|----------|----------|----------|----------|----------|----------|----------|----------|----------|----------|
| P13667                                                                          | 7.63E+07 | 2.88E+07 | 4.24E+07 | 8.31E+07 | 5.29E+07 | 6.84E+07 | 0.00E+00 | 4.75E+07 | 2.93E+08 | 2.43E+08 | 2.31E+08 | 3.32E+08 | 2.19E+08 | 2.90E+08 | 1.72E+08 | 2.31E+08 | 1.51E+08 | 4.99E+07 | 2.51E+08 | 1.11E+08 | 2.71E+07 | 5.08E+07 | 1.06E-07 |          |
| P05787;P05787-2                                                                 | 2.00E+07 | 3.34E+07 | 2.57E+07 | 3.38E+07 | 4.36E+07 | 1.80E+07 | 1.69E+07 | 2.12E+07 | 0.00E+00 | 0.00E+00 | 0.00E+00 | 0.00E+00 | 0.00E+00 | 0.00E+00 | 0.00E+00 | 0.00E+00 | 1.33E+07 | 2.66E+07 | 0.00E+00 | 1.52E+07 | 9.47E+06 | 0.00E+00 | 1.50E-06 |          |
| P11021                                                                          | 6.34E+08 | 4.97E+08 | 5.92E+08 | 8.21E+08 | 7.61E+08 | 5.80E+08 | 3.74E+07 | 4.55E+08 | 1.92E+09 | 1.45E+09 | 1.47E+09 | 2.14E+09 | 1.56E+09 | 1.79E+09 | 1.18E+09 | 1.20E+09 | 1.07E+09 | 5.47E+08 | 1.59E+09 | 6.08E+08 | 2.40E+08 | 3.41E+08 | 5.64E-06 |          |
| A0A087X054;Q9Y4L1;E9PJ21;A0A087W4;K7EQK2;Q9Y4L1-2                               | 8.15E+07 | 7.85E+07 | 6.61E+07 | 3.67E+07 | 7.25E+07 | 0.00E+00 | 5.36E+07 | 7.08E+07 | 1.76E+08 | 1.43E+08 | 1.08E+08 | 2.43E+08 | 1.74E+08 | 2.28E+08 | 2.00E+08 | 1.61E+08 | 1.18E+08 | 5.75E+07 | 1.79E+08 | 7.21E+07 | 2.74E+07 | 4.42E+07 | 1.16E-05 |          |
| B4DLR8;P15559-3;P15559-2;H3BNV2;H3BRK3;P15559                                   | 3.35E+07 | 4.95E+07 | 5.06E+07 | 3.50E+07 | 4.36E+07 | 2.81E+07 | 3.50E+07 | 3.46E+07 | 0.00E+00 | 0.00E+00 | 0.00E+00 | 1.92E+07 | 2.64E+07 | 1.72E+07 | 0.00E+00 | 1.74E+07 | 2.44E+07 | 3.87E+07 | 1.00E+07 | 1.76E+07 | 8.16E+06 | 1.11E+07 | 3.89E-05 |          |
| P04083;Q5T3N1                                                                   | 1.66E+08 | 1.78E+08 | 1.37E+08 | 1.71E+08 | 1.92E+08 | 2.12E+08 | 2.22E+08 | 1.83E+08 | 1.31E+08 | 1.33E+08 | 1.31E+08 | 1.01E+08 | 1.06E+08 | 1.20E+08 | 7.03E+07 | 1.35E+08 | 1.49E+08 | 1.83E+08 | 1.16E+08 | 4.20E+07 | 2.67E+07 | 2.26E+07 | 9.36E-05 |          |
| O75369-2;O75369-9;O75369;O75369-8;O75369-3;E7EN95;O75369-7;O75369-5;O75369-4    | 1.68E+08 | 1.35E+08 | 1.67E+08 | 1.37E+08 | 1.70E+08 | 1.45E+08 | 1.95E+08 | 2.13E+08 | 5.23E+07 | 4.55E+07 | 7.01E+07 | 2.73E+07 | 1.35E+08 | 3.89E+07 | 4.48E+07 | 1.37E+08 | 1.18E+08 | 1.66E+08 | 6.88E+07 | 6.12E+07 | 2.75E+07 | 4.31E+07 | 9.56E-05 |          |
| P78527-2;P78527                                                                 | 2.59E+07 | 1.08E+07 | 1.66E+07 | 2.50E+07 | 1.48E+07 | 1.72E+07 | 0.00E+00 | 2.57E+07 | 0.00E+00 | 0.00E+00 | 1.40E+07 | 0.00E+00 | 0.00E+00 | 0.00E+00 | 0.00E+00 | 0.00E+00 | 9.37E+06 | 1.70E+07 | 1.75E+06 | 1.05E+07 | 8.87E+06 | 4.94E+06 | 8.11E-04 |          |
| E7ER77;Q7Z2K6                                                                   | 1.23E+08 | 3.84E+08 | 5.17E+08 | 3.69E+08 | 2.03E+08 | 5.19E+08 | 3.90E+08 | 4.59E+08 | 5.68E+08 | 6.66E+08 | 6.88E+08 | 7.16E+08 | 6.60E+08 | 5.17E+08 | 4.96E+08 | 6.09E+08 | 4.93E+08 | 3.70E+08 | 6.15E+08 | 1.69E+08 | 1.42E+08 | 8.11E+07 | 8.46E-04 |          |
| Q09666                                                                          | 1.26E+08 | 4.86E+08 | 3.23E+08 | 8.42E+08 | 6.11E+08 | 0.00E+00 | 6.69E+08 | 4.60E+08 | 1.37E+09 | 9.44E+08 | 9.31E+08 | 1.93E+09 | 1.04E+09 | 1.55E+09 | 8.05E+08 | 8.25E+08 | 8.06E+08 | 4.39E+08 | 1.17E+09 | 5.06E+08 | 2.81E+08 | 4.04E+08 | 8.51E-04 |          |
| P14625                                                                          | 6.69E+07 | 5.69E+07 | 6.92E+07 | 9.79E+07 | 1.19E+08 | 6.51E+07 | 0.00E+00 | 1.06E+08 | 1.44E+08 | 1.36E+08 | 1.70E+08 | 1.59E+08 | 9.66E+07 | 1.21E+08 | 1.29E+08 | 1.37E+08 | 1.05E+08 | 7.26E+07 | 1.37E+08 | 4.43E+07 | 3.69E+07 | 2.25E+07 | 9.07E-04 |          |
| P02545;P02545-3;P02545-6;P02545-5;P02545-4                                      | 1.53E+08 | 9.29E+07 | 1.70E+08 | 1.92E+08 | 1.25E+08 | 1.34E+08 | 6.68E+07 | 1.27E+08 | 1.12E+08 | 6.07E+07 | 0.00E+00 | 9.96E+07 | 5.30E+07 | 2.80E+07 | 3.69E+07 | 3.45E+07 | 9.29E+07 | 1.33E+08 | 5.31E+07 | 5.56E+07 | 4.03E+07 | 3.74E+07 | 1.11E-03 |          |
| P49419-2;P49419;F8VSO2;P49419-4;P49419-3                                        | 1.75E+07 | 1.12E+07 | 1.01E+07 | 1.45E+07 | 1.53E+07 | 9.98E+06 | 1.62E+07 | 0.00E+00 | 0.00E+00 | 9.55E+06 | 0.00E+00 | 0.00E+00 | 0.00E+00 | 0.00E+00 | 1.04E+07 | 0.00E+00 | 0.00E+00 | 7.16E+06 | 1.18E+07 | 2.49E+06 | 6.90E+06 | 5.56E+06 | 4.61E+06 | 2.59E-03 |
| E9PKG1;Q99873-3;Q99873-2;Q99873-4;Q99873;H7C2I1;E9PIX6;E9PQ98;H0YDE4;A0A087X1W2 | 1.23E+07 | 1.29E+07 | 1.56E+07 | 1.46E+07 | 1.91E+07 | 2.19E+07 | 0.00E+00 | 1.84E+07 | 0.00E+00 | 1.53E+07 | 0.00E+00 | 0.00E+00 | 0.00E+00 | 0.00E+00 | 0.00E+00 | 9.08E+06 | 8.69E+06 | 1.43E+07 | 3.04E+06 | 8.41E+06 | 6.65E+06 | 5.87E+06 | 2.88E-03 |          |
| P17987;E7EQR6;F5H282;E7ERF2                                                     | 0.00E+00 | 3.47E+07 | 0.00E+00 | 2.44E+07 | 2.12E+07 | 0.00E+00 | 2.87E+07 | 2.76E+07 | 2.78E+07 | 3.02E+07 | 5.60E+07 | 4.93E+07 | 3.07E+07 | 3.49E+07 | 3.36E+07 | 6.02E+07 | 2.87E+07 | 1.71E+07 | 4.03E+07 | 1.79E+07 | 1.47E+07 | 1.28E+07 | 4.48E-03 |          |
| P12814-2;P12814;P12814-3;P12814-4;H9KV75                                        | 6.92E+07 | 3.26E+07 | 1.36E+08 | 1.71E+08 | 1.05E+08 | 3.42E+07 | 8.50E+07 | 3.26E+07 | 2.63E+08 | 2.43E+08 | 2.30E+08 | 2.95E+08 | 2.30E+08 | 3.85E+07 | 1.30E+08 | 1.69E+08 | 1.42E+08 | 8.32E+07 | 2.00E+08 | 9.01E+07 | 5.17E+07 | 8.33E+07 | 4.60E-03 |          |
| P07237;H7BZ94;F5H8J2;I3L312;I3L398                                              | 4.04E+06 | 0.00E+00 | 3.95E+06 | 0.00E+00 | 5.89E+06 | 5.08E+06 | 0.00E+00 | 6.31E+06 | 0.00E+00 | 0.00E+00 | 0.00E+00 | 0.00E+00 | 0.00E+00 | 0.00E+00 | 0.00E+00 | 0.00E+00 | 1.58E+06 | 3.16E+06 | 0.00E+00 | 2.48E+06 | 2.74E+06 | 0.00E+00 | 5.64E-03 |          |
| P19623                                                                          | 8.67E+07 | 7.04E+07 | 8.24E+07 | 8.46E+07 | 6.40E+07 | 1.30E+08 | 7.86E+07 | 7.41E+07 | 1.69E+08 | 1.39E+08 | 1.16E+08 | 1.80E+08 | 1.41E+08 | 5.82E+07 | 1.29E+08 | 1.23E+08 | 1.08E+08 | 8.39E+07 | 1.32E+08 | 3.79E+07 | 2.03E+07 | 3.69E+07 | 6.27E-03 |          |
| P30101                                                                          | 2.74E+07 | 3.15E+07 | 3.01E+07 | 2.18E+07 | 1.66E+07 | 2.17E+07 | 3.54E+07 | 3.18E+07 | 6.64E+07 | 3.80E+07 | 5.05E+07 | 7.16E+07 | 2.45E+07 | 7.95E+07 | 2.48E+07 | 6.17E+07 | 3.96E+07 | 2.70E+07 | 5.21E+07 | 1.99E+07 | 6.40E+06 | 2.12E+07 | 6.33E-03 |          |
| P12270;P12270-2                                                                 | 7.68E+08 | 1.06E+09 | 7.71E+08 | 1.18E+09 | 1.21E+09 | 7.99E+08 | 1.25E+09 | 5.45E+08 | 1.45E+09 | 1.53E+09 | 2.03E+09 | 1.59E+09 | 1.22E+09 | 8.89E+08 | 1.29E+09 | 1.28E+09 | 1.18E+09 | 9.48E+08 | 1.41E+09 | 3.74E+08 | 2.60E+08 | 3.32E+08 | 7.86E-03 |          |
| P08670;B0YJC4;B0YJC5                                                            | 6.36E+07 | 5.68E+07 | 7.30E+07 | 3.88E+07 | 4.49E+07 | 5.71E+07 | 5.23E+07 | 3.41E+07 | 0.00E+00 | 0.00E+00 | 0.00E+00 | 2.23E+07 | 5.28E+07 | 2.92E+07 | 5.50E+07 | 3.33E+07 | 3.83E+07 | 5.26E+07 | 2.41E+07 | 2.32E+07 | 1.29E+07 | 2.28E+07 | 8.27E-03 |          |
| P23396;E9PPU1;P23396-2;E9PLO9;F2Z2S8;H0YCY7;H0YEU2;H0YF32                       | 0.00E+00 | 0.00E+00 | 0.00E+00 | 0.00E+00 | 0.00E+00 | 0.00E+00 | 0.00E+00 | 0.00E+00 | 0.00E+00 | 1.11E+07 | 1.78E+07 | 0.00E+00 | 9.15E+06 | 0.00E+00 | 7.58E+06 | 1.55E+07 | 3.82E+06 | 0.00E+00 | 7.64E+06 | 6.26E+06 | 0.00E+00 | 7.12E+06 | 8.85E-03 |          |

|                                                                                                                                                                   |          |          |          |          |          |          |          |          |          |          |          |          |          |          |          |          |          |          |          |          |          |          |          |          |
|-------------------------------------------------------------------------------------------------------------------------------------------------------------------|----------|----------|----------|----------|----------|----------|----------|----------|----------|----------|----------|----------|----------|----------|----------|----------|----------|----------|----------|----------|----------|----------|----------|----------|
| P35637-2;P35637;H3BPE7                                                                                                                                            | 0.00E+00 | 0.00E+00 | 0.00E+00 | 0.00E+00 | 0.00E+00 | 0.00E+00 | 0.00E+00 | 0.00E+00 | 0.00E+00 | 0.00E+00 | 1.89E+07 | 0.00E+00 | 1.99E+07 | 1.34E+07 | 0.00E+00 | 8.96E+06 | 9.01E+06 | 4.39E+06 | 0.00E+00 | 8.77E+06 | 7.24E+06 | 0.00E+00 | 8.27E+06 | 9.53E-03 |
| Q9UBS4                                                                                                                                                            | 1.03E+07 | 0.00E+00 | 9.28E+06 | 1.56E+07 | 1.30E+07 | 8.00E+06 | 0.00E+00 | 2.46E+07 | 0.00E+00 | 8.04E+06 | 0.00E+00 | 0.00E+00 | 0.00E+00 | 0.00E+00 | 0.00E+00 | 0.00E+00 | 0.00E+00 | 5.56E+06 | 1.01E+07 | 1.00E+06 | 7.51E+06 | 8.09E+06 | 2.84E+06 | 9.54E-03 |
| P02792;A0A087X1B9                                                                                                                                                 | 2.30E+07 | 3.71E+07 | 3.68E+07 | 3.46E+07 | 3.53E+07 | 3.95E+07 | 3.42E+07 | 2.03E+07 | 0.00E+00 | 0.00E+00 | 0.00E+00 | 1.89E+07 | 4.53E+07 | 2.04E+07 | 0.00E+00 | 2.74E+07 | 2.33E+07 | 3.26E+07 | 1.40E+07 | 1.58E+07 | 7.00E+06 | 1.69E+07 | 1.22E-02 |          |
| P15880;H0YEN5;E9PQD7;E9PPT0;E9PMM9                                                                                                                                | 2.87E+08 | 4.28E+08 | 5.26E+08 | 3.20E+08 | 4.24E+08 | 2.16E+08 | 1.74E+08 | 3.48E+08 | 9.86E+07 | 2.67E+08 | 2.88E+08 | 6.89E+07 | 1.93E+08 | 5.35E+07 | 2.90E+08 | 2.30E+08 | 2.63E+08 | 3.41E+08 | 1.86E+08 | 1.32E+08 | 1.17E+08 | 9.91E+07 | 1.29E-02 |          |
| P14618;P14618-2;P14618-3;B4DNK4;H3B7NS;H3BQ34;H3BR70                                                                                                              | 2.35E+07 | 0.00E+00 | 2.75E+07 | 1.88E+07 | 0.00E+00 | 8.76E+06 | 0.00E+00 | 1.03E+07 | 0.00E+00 | 0.00E+00 | 0.00E+00 | 0.00E+00 | 0.00E+00 | 0.00E+00 | 0.00E+00 | 0.00E+00 | 0.00E+00 | 5.56E+06 | 1.11E+07 | 0.00E+00 | 9.49E+06 | 1.11E+07 | 0.00E+00 | 1.31E-02 |
| Q9Y4W6                                                                                                                                                            | 9.88E+06 | 2.28E+07 | 5.68E+06 | 0.00E+00 | 1.60E+07 | 0.00E+00 | 8.76E+06 | 1.07E+07 | 0.00E+00 | 5.72E+06 | 0.00E+00 | 0.00E+00 | 3.74E+06 | 0.00E+00 | 0.00E+00 | 0.00E+00 | 0.00E+00 | 5.21E+06 | 9.23E+06 | 1.18E+06 | 6.88E+06 | 7.71E+06 | 2.25E+06 | 1.33E-02 |
| P53621;P53621-2                                                                                                                                                   | 9.63E+07 | 6.65E+07 | 3.67E+07 | 7.72E+07 | 5.65E+07 | 0.00E+00 | 1.28E+08 | 9.97E+07 | 1.19E+08 | 1.01E+08 | 8.88E+07 | 1.42E+08 | 1.05E+08 | 1.07E+08 | 1.21E+08 | 1.12E+08 | 9.11E+07 | 7.01E+07 | 1.12E+08 | 3.65E+07 | 3.99E+07 | 1.59E+07 | 1.52E-02 |          |
| P55072                                                                                                                                                            | 4.40E+07 | 5.21E+07 | 7.31E+07 | 2.21E+07 | 0.00E+00 | 2.11E+07 | 0.00E+00 | 0.00E+00 | 0.00E+00 | 0.00E+00 | 0.00E+00 | 0.00E+00 | 0.00E+00 | 0.00E+00 | 0.00E+00 | 0.00E+00 | 0.00E+00 | 1.33E+07 | 2.66E+07 | 0.00E+00 | 2.33E+07 | 2.75E+07 | 0.00E+00 | 1.62E-02 |
| P21980                                                                                                                                                            | 0.00E+00 | 0.00E+00 | 0.00E+00 | 0.00E+00 | 0.00E+00 | 0.00E+00 | 2.26E+07 | 1.78E+07 | 2.44E+07 | 1.64E+07 | 1.22E+07 | 1.93E+07 | 5.57E+06 | 1.21E+07 | 1.29E+07 | 2.91E+07 | 1.08E+07 | 5.05E+06 | 1.65E+07 | 1.02E+07 | 9.44E+06 | 7.55E+06 | 1.82E-02 |          |
| P43243;A8MXP9;D6REM6;D6R991                                                                                                                                       | 7.45E+06 | 0.00E+00 | 9.22E+06 | 0.00E+00 | 4.85E+06 | 4.98E+06 | 8.06E+06 | 5.82E+06 | 0.00E+00 | 0.00E+00 | 0.00E+00 | 3.07E+06 | 6.20E+06 | 0.00E+00 | 0.00E+00 | 0.00E+00 | 3.10E+06 | 5.05E+06 | 1.16E+06 | 3.48E+06 | 3.46E+06 | 2.30E+06 | 1.92E-02 |          |
| P62136;P62136-2;F8VYE8;P36873;F8W0W8;P36873-2;E9PMD7;F8VR82;P62136-3;E7ETD8                                                                                       | 6.23E+07 | 6.62E+07 | 5.79E+07 | 5.83E+07 | 6.18E+07 | 5.78E+07 | 5.36E+07 | 7.55E+07 | 6.47E+07 | 4.40E+07 | 5.45E+07 | 4.77E+07 | 3.68E+07 | 3.35E+07 | 5.74E+07 | 5.85E+07 | 5.57E+07 | 6.17E+07 | 4.96E+07 | 1.08E+07 | 6.73E+06 | 1.10E+07 | 1.95E-02 |          |
| C9J9K3;P08865;A6NE09                                                                                                                                              | 6.93E+06 | 7.33E+06 | 9.37E+06 | 0.00E+00 | 0.00E+00 | 0.00E+00 | 6.98E+06 | 0.00E+00 | 0.00E+00 | 0.00E+00 | 0.00E+00 | 0.00E+00 | 0.00E+00 | 0.00E+00 | 0.00E+00 | 0.00E+00 | 1.91E+06 | 3.83E+06 | 0.00E+00 | 3.46E+06 | 4.16E+06 | 0.00E+00 | 2.09E-02 |          |
| Q08945                                                                                                                                                            | 3.94E+06 | 0.00E+00 | 4.18E+06 | 0.00E+00 | 3.86E+06 | 2.44E+06 | 0.00E+00 | 0.00E+00 | 0.00E+00 | 0.00E+00 | 0.00E+00 | 0.00E+00 | 0.00E+00 | 0.00E+00 | 0.00E+00 | 0.00E+00 | 0.00E+00 | 9.01E+05 | 1.80E+06 | 0.00E+00 | 1.65E+06 | 1.99E+06 | 0.00E+00 | 2.29E-02 |
| O43390;O43390-3;O43390-2;B4DT28;O43390-4                                                                                                                          | 1.87E+06 | 0.00E+00 | 0.00E+00 | 3.35E+06 | 3.01E+06 | 0.00E+00 | 0.00E+00 | 3.02E+06 | 0.00E+00 | 0.00E+00 | 0.00E+00 | 0.00E+00 | 0.00E+00 | 0.00E+00 | 0.00E+00 | 0.00E+00 | 0.00E+00 | 7.04E+05 | 1.41E+06 | 0.00E+00 | 1.29E+06 | 1.56E+06 | 0.00E+00 | 2.33E-02 |
| P31942-3;P31942-2;P31942;P31942-6;P31942-5;P31942-4                                                                                                               | 1.24E+08 | 6.04E+07 | 1.32E+08 | 1.21E+08 | 0.00E+00 | 9.13E+07 | 5.20E+07 | 4.02E+07 | 3.93E+07 | 3.20E+07 | 3.50E+07 | 0.00E+00 | 0.00E+00 | 0.00E+00 | 8.80E+07 | 2.73E+07 | 5.26E+07 | 7.76E+07 | 2.77E+07 | 4.59E+07 | 4.71E+07 | 2.96E+07 | 2.38E-02 |          |
| H0YD13;H0Y2P0;P16070-18;P16070-12;P16070-14;P16070-13;P16070-11;P16070-10;P16070-16;P16070-8;P16070-17;P16070-6;P16070-4;P16070-3;P16070-7;P16070-5;P16070;H0YE40 | 1.49E+08 | 2.36E+08 | 2.29E+08 | 1.21E+08 | 1.94E+08 | 1.36E+08 | 1.60E+08 | 2.06E+08 | 9.91E+07 | 1.19E+08 | 1.42E+08 | 1.50E+08 | 1.76E+08 | 0.00E+00 | 1.32E+08 | 1.30E+08 | 1.49E+08 | 1.79E+08 | 1.19E+08 | 5.61E+07 | 4.33E+07 | 5.30E+07 | 2.61E-02 |          |
| P00352                                                                                                                                                            | 1.21E+08 | 8.04E+07 | 6.99E+07 | 4.54E+07 | 4.22E+07 | 9.12E+07 | 1.03E+08 | 3.12E+07 | 1.08E+08 | 1.18E+08 | 1.46E+08 | 2.04E+08 | 1.57E+08 | 1.88E+07 | 1.36E+08 | 1.30E+08 | 1.00E+08 | 7.30E+07 | 1.27E+08 | 5.05E+07 | 3.17E+07 | 5.28E+07 | 2.61E-02 |          |
| P27797;K7EJB9                                                                                                                                                     | 8.31E+07 | 1.11E+08 | 1.37E+08 | 4.86E+07 | 8.67E+07 | 1.29E+08 | 1.74E+08 | 1.40E+08 | 6.61E+07 | 8.16E+07 | 6.30E+07 | 8.40E+07 | 6.32E+07 | 0.00E+00 | 1.05E+08 | 9.11E+07 | 9.15E+07 | 1.14E+08 | 6.92E+07 | 4.16E+07 | 3.98E+07 | 3.16E+07 | 2.65E-02 |          |
| P30041                                                                                                                                                            | 0.00E+00 | 1.12E+07 | 0.00E+00 | 0.00E+00 | 1.03E+07 | 8.92E+06 | 1.55E+07 | 1.38E+07 | 0.00E+00 | 0.00E+00 | 0.00E+00 | 0.00E+00 | 0.00E+00 | 9.03E+06 | 0.00E+00 | 0.00E+00 | 4.30E+06 | 7.48E+06 | 1.13E+06 | 5.94E+06 | 6.51E+06 | 3.19E+06 | 2.67E-02 |          |
| O95433;G3V438;O95433-2;H0YJ63;H0YJG7                                                                                                                              | 0.00E+00 | 0.00E+00 | 0.00E+00 | 0.00E+00 | 0.00E+00 | 0.00E+00 | 0.00E+00 | 0.00E+00 | 0.00E+00 | 4.98E+06 | 0.00E+00 | 6.55E+06 | 9.10E+06 | 4.81E+06 | 0.00E+00 | 0.00E+00 | 0.00E+00 | 1.59E+06 | 0.00E+00 | 3.18E+06 | 2.98E+06 | 0.00E+00 | 3.64E+06 | 2.69E-02 |
| P16615-5;P16615-2;P16615-3;P16615;H7C5W9;P16615-4                                                                                                                 | 2.24E+07 | 1.40E+07 | 0.00E+00 | 0.00E+00 | 0.00E+00 | 0.00E+00 | 2.04E+07 | 2.54E+07 | 2.92E+07 | 2.77E+07 | 0.00E+00 | 2.45E+07 | 2.02E+07 | 3.13E+07 | 2.68E+07 | 2.93E+07 | 1.69E+07 | 1.03E+07 | 2.36E+07 | 1.25E+07 | 1.14E+07 | 1.01E+07 | 2.70E-02 |          |
| Q8N163;Q8N163-2;H0YB24                                                                                                                                            | 1.13E+07 | 3.15E+07 | 1.92E+07 | 1.11E+07 | 1.48E+07 | 6.39E+06 | 0.00E+00 | 1.16E+07 | 9.71E+06 | 1.75E+07 | 0.00E+00 | 0.00E+00 | 0.00E+00 | 0.00E+00 | 0.00E+00 | 0.00E+00 | 8.32E+06 | 1.32E+07 | 3.40E+06 | 9.31E+06 | 9.29E+06 | 6.62E+06 | 2.87E-02 |          |
| P48643-2;E7ENZ3;B7ZAR1;E9PCA1;P48643                                                                                                                              | 3.52E+07 | 5.83E+07 | 4.06E+07 | 2.66E+07 | 5.97E+07 | 3.44E+07 | 0.00E+00 | 3.81E+07 | 0.00E+00 | 0.00E+00 | 0.00E+00 | 1.51E+07 | 2.42E+07 | 3.95E+07 | 0.00E+00 | 1.30E+07 | 3.47E+07 | 2.62E+07 | 3.66E+07 | 1.58E+07 | 1.99E+07 | 1.88E+07 | 1.58E+07 | 3.11E-02 |

|                                                                                                      |          |          |          |          |          |          |          |          |          |          |          |          |          |          |          |          |          |          |          |          |          |          |          |
|------------------------------------------------------------------------------------------------------|----------|----------|----------|----------|----------|----------|----------|----------|----------|----------|----------|----------|----------|----------|----------|----------|----------|----------|----------|----------|----------|----------|----------|
| P62424;Q5T8U2;Q5T8U3                                                                                 | 4.52E+07 | 5.46E+07 | 2.91E+07 | 4.71E+07 | 5.70E+07 | 3.66E+07 | 4.37E+07 | 4.23E+07 | 3.84E+07 | 2.69E+07 | 4.80E+07 | 0.00E+00 | 4.62E+07 | 2.23E+07 | 0.00E+00 | 3.31E+07 | 3.57E+07 | 4.44E+07 | 2.69E+07 | 1.69E+07 | 9.01E+06 | 1.87E+07 | 3.14E-02 |
| P23526;P23526-2                                                                                      | 0.00E+00 | 5.03E+07 | 0.00E+00 | 1.51E+07 | 0.00E+00 | 0.00E+00 | 8.95E+07 | 3.81E+07 | 6.29E+07 | 7.14E+07 | 6.76E+07 | 3.89E+07 | 3.72E+07 | 2.94E+07 | 6.00E+07 | 7.34E+07 | 3.96E+07 | 2.41E+07 | 5.51E+07 | 3.00E+07 | 3.29E+07 | 1.72E+07 | 3.33E-02 |
| P09874                                                                                               | 0.00E+00 | 0.00E+00 | 0.00E+00 | 0.00E+00 | 5.28E+06 | 0.00E+00 | 0.00E+00 | 0.00E+00 | 5.37E+06 | 5.75E+06 | 0.00E+00 | 5.85E+06 | 0.00E+00 | 1.21E+07 | 0.00E+00 | 8.02E+06 | 2.65E+06 | 6.60E+05 | 4.64E+06 | 3.86E+06 | 1.87E+06 | 4.40E+06 | 3.36E-02 |
| E9PKD5;E9PM69;R4GNH3;P17980;E9PMD8                                                                   | 0.00E+00 | 0.00E+00 | 0.00E+00 | 0.00E+00 | 1.18E+07 | 3.00E+07 | 3.11E+07 | 1.65E+07 | 0.00E+00 | 0.00E+00 | 0.00E+00 | 0.00E+00 | 0.00E+00 | 0.00E+00 | 0.00E+00 | 0.00E+00 | 5.59E+06 | 1.12E+07 | 0.00E+00 | 1.09E+07 | 1.35E+07 | 0.00E+00 | 3.49E-02 |
| P23381;P23381-2                                                                                      | 0.00E+00 | 0.00E+00 | 0.00E+00 | 0.00E+00 | 0.00E+00 | 0.00E+00 | 0.00E+00 | 0.00E+00 | 6.43E+06 | 0.00E+00 | 0.00E+00 | 3.56E+06 | 0.00E+00 | 3.88E+06 | 0.00E+00 | 2.06E+06 | 9.95E+05 | 0.00E+00 | 1.99E+06 | 1.96E+06 | 0.00E+00 | 2.44E+06 | 3.66E-02 |
| P08621-3;P08621-2;P08621                                                                             | 8.51E+07 | 6.36E+07 | 9.57E+07 | 2.54E+07 | 1.92E+07 | 2.99E+07 | 3.01E+07 | 3.44E+07 | 1.40E+07 | 4.31E+07 | 2.69E+07 | 0.00E+00 | 0.00E+00 | 1.32E+07 | 3.71E+07 | 3.01E+07 | 3.42E+07 | 4.79E+07 | 2.05E+07 | 2.70E+07 | 2.94E+07 | 1.63E+07 | 3.72E-02 |
| P13010                                                                                               | 7.13E+06 | 0.00E+00 | 9.83E+06 | 1.07E+07 | 6.45E+06 | 1.06E+07 | 0.00E+00 | 6.69E+06 | 8.51E+06 | 0.00E+00 | 5.02E+06 | 0.00E+00 | 0.00E+00 | 0.00E+00 | 0.00E+00 | 3.50E+06 | 4.28E+06 | 6.43E+06 | 2.13E+06 | 4.31E+06 | 4.32E+06 | 3.24E+06 | 4.09E-02 |
| Q9H845;H0Y8Z9                                                                                        | 3.61E+07 | 4.73E+07 | 3.12E+07 | 3.22E+07 | 3.26E+07 | 5.43E+07 | 0.00E+00 | 4.51E+07 | 1.28E+07 | 1.81E+07 | 1.91E+07 | 1.29E+07 | 2.47E+07 | 2.31E+07 | 3.07E+07 | 2.57E+07 | 2.79E+07 | 3.48E+07 | 2.09E+07 | 1.40E+07 | 1.64E+07 | 6.30E+06 | 4.12E-02 |
| P12956;B1AHC9;P12956-2                                                                               | 0.00E+00 | 5.08E+07 | 0.00E+00 | 2.45E+07 | 4.34E+07 | 0.00E+00 | 4.81E+07 | 3.15E+07 | 2.33E+07 | 5.12E+07 | 7.71E+07 | 4.03E+07 | 6.27E+07 | 2.75E+07 | 6.60E+07 | 3.72E+07 | 3.65E+07 | 2.48E+07 | 4.81E+07 | 2.34E+07 | 2.22E+07 | 1.93E+07 | 4.12E-02 |
| Q92598-2;Q92598;Q92598-3;Q92598-4;A0A0A0MSMO                                                         | 0.00E+00 | 0.00E+00 | 0.00E+00 | 1.70E+07 | 2.25E+07 | 0.00E+00 | 4.55E+06 | 1.36E+07 | 0.00E+00 | 0.00E+00 | 0.00E+00 | 0.00E+00 | 0.00E+00 | 0.00E+00 | 0.00E+00 | 0.00E+00 | 3.60E+06 | 7.21E+06 | 0.00E+00 | 7.27E+06 | 9.15E+06 | 0.00E+00 | 4.27E-02 |
| F8VZY9;P05783                                                                                        | 0.00E+00 | 7.54E+06 | 0.00E+00 | 0.00E+00 | 5.85E+06 | 0.00E+00 | 1.27E+07 | 1.00E+07 | 2.01E+07 | 6.86E+06 | 1.12E+07 | 8.40E+06 | 9.88E+06 | 1.42E+07 | 0.00E+00 | 1.59E+07 | 7.66E+06 | 4.51E+06 | 1.08E+07 | 6.38E+06 | 5.20E+06 | 6.13E+06 | 4.35E-02 |
| Q13813-3;Q13813;Q13813-2                                                                             | 0.00E+00 | 4.48E+07 | 2.04E+07 | 3.47E+07 | 0.00E+00 | 0.00E+00 | 4.29E+07 | 3.13E+07 | 4.56E+07 | 2.87E+07 | 3.76E+07 | 5.67E+07 | 4.18E+07 | 3.18E+07 | 2.76E+07 | 3.99E+07 | 3.02E+07 | 2.18E+07 | 3.87E+07 | 1.72E+07 | 1.95E+07 | 9.66E+06 | 4.46E-02 |
| Q13263;Q13263-2;MOROK9                                                                               | 2.62E+07 | 7.98E+06 | 1.43E+07 | 1.19E+07 | 0.00E+00 | 0.00E+00 | 9.95E+06 | 0.00E+00 | 0.00E+00 | 0.00E+00 | 0.00E+00 | 5.52E+06 | 6.11E+06 | 0.00E+00 | 0.00E+00 | 0.00E+00 | 5.13E+06 | 8.81E+06 | 1.45E+06 | 7.51E+06 | 9.09E+06 | 2.70E+06 | 4.58E-02 |
| Q15758                                                                                               | 4.49E+07 | 3.19E+07 | 4.35E+07 | 4.44E+07 | 4.64E+07 | 4.39E+07 | 2.96E+07 | 3.42E+07 | 4.00E+07 | 4.39E+07 | 1.58E+07 | 4.38E+07 | 0.00E+00 | 2.92E+07 | 2.77E+07 | 1.27E+07 | 3.32E+07 | 3.99E+07 | 2.66E+07 | 1.37E+07 | 6.76E+06 | 1.60E+07 | 4.95E-02 |
| Q13838;Q13838-2;Q5STU3;H0Y400;F6UJC5;O00148;F6WLT2                                                   | 0.00E+00 | 0.00E+00 | 0.00E+00 | 0.00E+00 | 0.00E+00 | 0.00E+00 | 2.35E+07 | 1.72E+07 | 2.40E+07 | 2.62E+07 | 3.68E+07 | 0.00E+00 | 0.00E+00 | 0.00E+00 | 3.36E+07 | 5.10E+07 | 1.33E+07 | 5.08E+06 | 2.15E+07 | 1.71E+07 | 9.56E+06 | 1.95E+07 | 5.13E-02 |
| Q15029-2;Q15029;Q15029-3;K7EP67                                                                      | 9.58E+07 | 5.12E+08 | 6.04E+08 | 3.28E+08 | 3.56E+08 | 6.98E+07 | 5.82E+08 | 4.36E+08 | 5.40E+08 | 3.74E+08 | 3.99E+08 | 8.16E+08 | 6.14E+08 | 6.23E+08 | 5.21E+08 | 5.74E+08 | 4.65E+08 | 3.73E+08 | 5.57E+08 | 1.94E+08 | 2.04E+08 | 1.39E+08 | 5.30E-02 |
| P19338;H7BY16                                                                                        | 0.00E+00 | 3.53E+07 | 0.00E+00 | 3.86E+07 | 2.86E+07 | 0.00E+00 | 4.46E+07 | 0.00E+00 | 0.00E+00 | 0.00E+00 | 0.00E+00 | 0.00E+00 | 2.01E+07 | 0.00E+00 | 0.00E+00 | 0.00E+00 | 1.04E+07 | 1.84E+07 | 2.51E+06 | 1.67E+07 | 2.01E+07 | 7.10E+06 | 5.41E-02 |
| Q2TB90;Q2TB90-2;Q2TB90-3                                                                             | 2.14E+07 | 3.11E+07 | 3.14E+07 | 4.47E+07 | 4.18E+07 | 3.71E+07 | 2.69E+07 | 2.66E+07 | 2.23E+07 | 3.61E+07 | 2.36E+07 | 1.97E+07 | 3.34E+07 | 0.00E+00 | 2.52E+07 | 2.13E+07 | 2.77E+07 | 3.26E+07 | 2.27E+07 | 1.05E+07 | 8.01E+06 | 1.09E+07 | 5.73E-02 |
| P29692;P29692-3;E9PK01;P29692-2;E9PRY8;A0A087X1X7;E9PMW7;E9PRR1;E9PL12;E9PQ49;E9P139;E9PQZ1;P29692-4 | 2.35E+07 | 8.84E+07 | 3.34E+07 | 0.00E+00 | 9.03E+07 | 0.00E+00 | 1.40E+08 | 1.14E+08 | 6.42E+07 | 1.98E+08 | 1.51E+08 | 7.17E+07 | 9.98E+07 | 6.00E+07 | 1.18E+08 | 1.58E+08 | 8.81E+07 | 6.12E+07 | 1.15E+08 | 5.75E+07 | 5.38E+07 | 5.03E+07 | 5.75E-02 |
| Q00839-2;Q00839                                                                                      | 1.91E+07 | 3.02E+07 | 0.00E+00 | 4.74E+07 | 3.61E+07 | 0.00E+00 | 4.22E+07 | 3.04E+07 | 3.81E+07 | 3.47E+07 | 2.65E+07 | 7.11E+07 | 4.68E+07 | 4.60E+07 | 3.34E+07 | 3.94E+07 | 3.38E+07 | 2.57E+07 | 4.20E+07 | 1.75E+07 | 1.80E+07 | 1.35E+07 | 5.92E-02 |
| P05556;P05556-2;P05556-5;P05556-4;P05556-3                                                           | 0.00E+00 | 0.00E+00 | 6.82E+06 | 5.54E+06 | 9.62E+06 | 7.79E+06 | 0.00E+00 | 0.00E+00 | 0.00E+00 | 0.00E+00 | 4.24E+06 | 0.00E+00 | 0.00E+00 | 0.00E+00 | 0.00E+00 | 0.00E+00 | 2.13E+06 | 3.72E+06 | 5.30E+05 | 3.43E+06 | 4.13E+06 | 1.50E+06 | 5.93E-02 |
| Q9NSD9;Q9NSD9-2                                                                                      | 2.54E+06 | 2.23E+06 | 0.00E+00 | 0.00E+00 | 2.55E+06 | 0.00E+00 | 0.00E+00 | 0.00E+00 | 0.00E+00 | 0.00E+00 | 0.00E+00 | 0.00E+00 | 0.00E+00 | 0.00E+00 | 0.00E+00 | 0.00E+00 | 4.58E+05 | 9.15E+05 | 0.00E+00 | 9.86E+05 | 1.27E+06 | 0.00E+00 | 6.03E-02 |
| E7EU96;P68400;Q5U5J2;Q8NEV1                                                                          | 0.00E+00 | 0.00E+00 | 0.00E+00 | 0.00E+00 | 7.39E+06 | 0.00E+00 | 7.46E+06 | 8.64E+06 | 0.00E+00 | 0.00E+00 | 0.00E+00 | 0.00E+00 | 0.00E+00 | 0.00E+00 | 0.00E+00 | 0.00E+00 | 1.47E+06 | 2.94E+06 | 0.00E+00 | 3.17E+06 | 4.07E+06 | 0.00E+00 | 6.06E-02 |
| B5MCX3;Q15019;Q15019-3;Q15019-2;C9J2Q4;H7C2Y0                                                        | 0.00E+00 | 0.00E+00 | 0.00E+00 | 0.00E+00 | 0.00E+00 | 0.00E+00 | 0.00E+00 | 0.00E+00 | 2.91E+06 | 3.26E+06 | 2.59E+06 | 0.00E+00 | 0.00E+00 | 0.00E+00 | 0.00E+00 | 0.00E+00 | 5.48E+05 | 0.00E+00 | 1.10E+06 | 1.18E+06 | 0.00E+00 | 1.52E+06 | 6.12E-02 |
| Q9H2G2-2;Q9H2G2                                                                                      | 0.00E+00 | 0.00E+00 | 0.00E+00 | 0.00E+00 | 0.00E+00 | 0.00E+00 | 0.00E+00 | 0.00E+00 | 0.00E+00 | 9.28E+06 | 0.00E+00 | 0.00E+00 | 7.47E+06 | 0.00E+00 | 0.00E+00 | 7.36E+06 | 1.51E+06 | 0.00E+00 | 3.01E+06 | 3.26E+06 | 0.00E+00 | 4.20E+06 | 6.18E-02 |
| Q13151                                                                                               | 0.00E+00 | 0.00E+00 | 0.00E+00 | 0.00E+00 | 0.00E+00 | 0.00E+00 | 0.00E+00 | 0.00E+00 | 0.00E+00 | 0.00E+00 | 0.00E+00 | 8.66E+06 | 1.08E+07 | 0.00E+00 | 0.00E+00 | 8.55E+06 | 1.75E+06 | 0.00E+00 | 3.50E+06 | 3.79E+06 | 0.00E+00 | 4.88E+06 | 6.18E-02 |
| H0YMZ1;H0YN18;H0YL69;P25789;H0YLC2;H0YKT8;H0YMA1;H0YLS6;P25789-2                                     | 1.01E+07 | 1.17E+07 | 0.00E+00 | 0.00E+00 | 8.79E+06 | 0.00E+00 | 0.00E+00 | 0.00E+00 | 0.00E+00 | 0.00E+00 | 0.00E+00 | 0.00E+00 | 0.00E+00 | 0.00E+00 | 0.00E+00 | 0.00E+00 | 1.91E+06 | 3.82E+06 | 0.00E+00 | 4.14E+06 | 5.33E+06 | 0.00E+00 | 6.20E-02 |
| Q14776-2;O14776;G3V220                                                                               | 2.27E+07 | 0.00E+00 | 0.00E+00 | 3.19E+07 | 2.27E+07 | 2.56E+07 | 2.92E+07 | 2.95E+07 | 2.17E+07 | 2.96E+07 | 3.52E+07 | 1.22E+08 | 4.24E+07 | 0.00E+00 | 7.15E+07 | 6.63E+07 | 3.44E+07 | 2.02E+07 | 4.86E+07 | 3.08E+07 | 1.29E+07 | 3.75E+07 | 6.26E-02 |





|                                                                                |          |          |          |          |          |          |          |          |          |          |          |          |          |          |          |          |          |          |          |          |          |          |          |          |
|--------------------------------------------------------------------------------|----------|----------|----------|----------|----------|----------|----------|----------|----------|----------|----------|----------|----------|----------|----------|----------|----------|----------|----------|----------|----------|----------|----------|----------|
| P52907                                                                         | 0.00E+00 | 0.00E+00 | 0.00E+00 | 0.00E+00 | 2.32E+06 | 0.00E+00 | 0.00E+00 | 0.00E+00 | 0.00E+00 | 0.00E+00 | 0.00E+00 | 2.75E+06 | 2.51E+06 | 2.46E+06 | 0.00E+00 | 4.31E+06 | 8.97E+05 | 2.90E+05 | 1.50E+06 | 1.44E+06 | 8.20E+05 | 1.71E+06 | 9.14E-02 |          |
| O75915;F8WF90;C9JQU6;F8WF33                                                    | 2.24E+07 | 1.16E+07 | 9.67E+06 | 1.73E+07 | 0.00E+00 | 0.00E+00 | 2.75E+07 | 1.82E+07 | 2.72E+07 | 2.56E+07 | 2.29E+07 | 1.36E+07 | 1.29E+07 | 2.09E+07 | 1.66E+07 | 2.49E+07 | 1.70E+07 | 1.33E+07 | 2.06E+07 | 8.65E+06 | 9.95E+06 | 5.56E+06 | 9.31E-02 |          |
| P08195-2;P08195-3;F5GZS6;P08195;J3KPF3;P08195-4                                | 4.60E+07 | 3.71E+07 | 6.38E+07 | 0.00E+00 | 0.00E+00 | 2.91E+06 | 0.00E+00 | 0.00E+00 | 2.78E+06 | 1.24E+07 | 0.00E+00 | 0.00E+00 | 0.00E+00 | 0.00E+00 | 0.00E+00 | 0.00E+00 | 1.03E+07 | 1.87E+07 | 1.89E+06 | 2.01E+07 | 2.61E+07 | 4.34E+06 | 9.35E-02 |          |
| Q96QK1                                                                         | 0.00E+00 | 0.00E+00 | 0.00E+00 | 0.00E+00 | 1.13E+07 | 0.00E+00 | 0.00E+00 | 1.02E+07 | 8.16E+06 | 8.75E+06 | 0.00E+00 | 1.22E+07 | 7.06E+06 | 1.29E+07 | 0.00E+00 | 7.63E+06 | 4.89E+06 | 2.69E+06 | 7.08E+06 | 5.27E+06 | 5.00E+06 | 4.84E+06 | 9.60E-02 |          |
| P31930                                                                         | 5.21E+08 | 3.75E+08 | 3.34E+08 | 5.38E+08 | 4.67E+08 | 6.39E+08 | 2.61E+07 | 4.52E+08 | 5.30E+08 | 6.07E+08 | 5.30E+08 | 5.90E+08 | 5.15E+08 | 6.06E+08 | 4.47E+08 | 5.00E+08 | 4.80E+08 | 4.19E+08 | 5.40E+08 | 1.46E+08 | 1.85E+08 | 5.65E+07 | 9.80E-02 |          |
| P38646                                                                         | 3.55E+08 | 4.44E+08 | 3.79E+08 | 2.64E+08 | 4.50E+08 | 4.51E+08 | 4.06E+08 | 5.08E+08 | 3.35E+08 | 4.26E+08 | 0.00E+00 | 2.97E+08 | 3.54E+08 | 4.81E+08 | 2.13E+07 | 3.74E+08 | 3.47E+08 | 4.07E+08 | 2.86E+08 | 1.47E+08 | 7.49E+07 | 1.79E+08 | 9.90E-02 |          |
| P06733;P06733-2                                                                | 4.05E+08 | 7.34E+08 | 6.07E+08 | 4.06E+08 | 5.47E+08 | 8.76E+08 | 5.10E+08 | 4.37E+08 | 5.16E+08 | 7.16E+08 | 2.69E+08 | 3.57E+08 | 5.71E+08 | 1.47E+08 | 3.72E+08 | 3.44E+08 | 4.88E+08 | 5.65E+08 | 4.12E+08 | 1.86E+08 | 1.68E+08 | 1.80E+08 | 9.98E-02 |          |
| Q9BQE3;F5H5D3;F8VVB9;Q9NY65-2;Q9NY65;C9J2C0                                    | 1.51E+07 | 1.97E+07 | 1.70E+07 | 0.00E+00 | 0.00E+00 | 7.13E+06 | 1.15E+07 | 1.84E+07 | 0.00E+00 | 0.00E+00 | 0.00E+00 | 0.00E+00 | 1.46E+07 | 0.00E+00 | 1.25E+07 | 1.04E+07 | 7.90E+06 | 1.11E+07 | 4.70E+06 | 7.78E+06 | 7.93E+06 | 6.58E+06 | 1.01E-01 |          |
| P20618                                                                         | 8.24E+06 | 8.87E+06 | 4.81E+06 | 0.00E+00 | 0.00E+00 | 0.00E+00 | 4.65E+06 | 3.31E+06 | 0.00E+00 | 0.00E+00 | 0.00E+00 | 0.00E+00 | 3.30E+06 | 4.50E+06 | 0.00E+00 | 2.11E+06 | 2.49E+06 | 3.73E+06 | 1.24E+06 | 3.04E+06 | 3.60E+06 | 1.82E+06 | 1.02E-01 |          |
| Q01081-2;Q01081;MOQYK5;Q01081-3;M0R2N4;Q8WU68-3;Q8WU68-2;Q8WU68;K7EJH3;K7EJM7  | 7.51E+07 | 0.00E+00 | 4.32E+07 | 3.57E+08 | 3.16E+08 | 2.94E+08 | 1.87E+08 | 2.00E+08 | 4.87E+08 | 3.36E+08 | 6.31E+08 | 1.94E+08 | 6.41E+07 | 4.65E+08 | 1.39E+08 | 3.11E+08 | 2.56E+08 | 1.84E+08 | 3.28E+08 | 1.77E+08 | 1.34E+08 | 1.92E+08 | 1.04E-01 |          |
| P35908                                                                         | 1.97E+07 | 0.00E+00 | 1.84E+07 | 1.99E+07 | 1.63E+07 | 7.60E+06 | 1.52E+07 | 1.52E+07 | 0.00E+00 | 1.42E+07 | 0.00E+00 | 0.00E+00 | 1.10E+07 | 1.71E+07 | 8.42E+06 | 1.33E+07 | 1.10E+07 | 1.40E+07 | 8.00E+06 | 7.43E+06 | 6.88E+06 | 7.07E+06 | 1.05E-01 |          |
| C9J3L8;C9J5W0;P43307;E9PAL7;C9J2Q1;P43307-2                                    | 8.57E+07 | 1.64E+08 | 1.14E+08 | 5.41E+07 | 1.59E+08 | 8.70E+07 | 1.63E+08 | 1.98E+08 | 1.09E+08 | 8.58E+07 | 1.05E+08 | 8.11E+07 | 9.77E+07 | 1.23E+08 | 1.31E+07 | 1.13E+08 | 1.09E+08 | 1.28E+08 | 9.09E+07 | 4.56E+07 | 4.99E+07 | 3.43E+07 | 1.06E-01 |          |
| P00558;P00558-2                                                                | 0.00E+00 | 0.00E+00 | 0.00E+00 | 0.00E+00 | 0.00E+00 | 0.00E+00 | 0.00E+00 | 0.00E+00 | 1.50E+07 | 0.00E+00 | 9.88E+06 | 0.00E+00 | 0.00E+00 | 9.48E+06 | 1.31E+07 | 4.26E+07 | 1.15E+07 | 6.35E+06 | 1.87E+06 | 1.08E+07 | 1.12E+07 | 5.29E+06 | 1.40E+07 | 1.13E-01 |
| P62873-2;P62873;B1AKQ8;F6X3N5;F6UT28                                           | 1.19E+08 | 8.43E+07 | 5.96E+07 | 7.40E+07 | 1.25E+08 | 1.03E+08 | 6.44E+07 | 6.55E+07 | 5.74E+07 | 1.67E+07 | 5.72E+07 | 4.65E+07 | 1.00E+08 | 4.67E+07 | 8.28E+07 | 1.02E+08 | 7.53E+07 | 8.69E+07 | 6.36E+07 | 2.92E+07 | 2.58E+07 | 2.93E+07 | 1.14E-01 |          |
| A0A0A0MR02;P45880-2;P45880;P45880-1;Q5JSD2;Q5JSD1                              | 2.39E+07 | 3.09E+07 | 2.72E+07 | 0.00E+00 | 0.00E+00 | 0.00E+00 | 2.67E+07 | 2.87E+07 | 1.74E+07 | 3.14E+07 | 2.16E+07 | 1.95E+07 | 2.39E+07 | 3.06E+07 | 3.35E+07 | 3.47E+07 | 2.19E+07 | 1.72E+07 | 2.66E+07 | 1.19E+07 | 1.43E+07 | 6.76E+06 | 1.15E-01 |          |
| P49736;H0Y8E6                                                                  | 6.52E+06 | 1.12E+07 | 8.22E+06 | 0.00E+00 | 9.94E+06 | 0.00E+00 | 7.51E+06 | 0.00E+00 | 0.00E+00 | 0.00E+00 | 0.00E+00 | 2.93E+06 | 7.65E+06 | 0.00E+00 | 0.00E+00 | 6.38E+06 | 3.77E+06 | 5.42E+06 | 2.12E+06 | 4.24E+06 | 4.70E+06 | 3.20E+06 | 1.23E-01 |          |
| P00491;G3V5M2                                                                  | 5.29E+07 | 1.12E+08 | 1.12E+08 | 1.32E+07 | 1.21E+08 | 2.99E+07 | 1.50E+08 | 1.63E+08 | 0.00E+00 | 9.72E+07 | 6.78E+07 | 3.61E+06 | 9.48E+07 | 0.00E+00 | 3.45E+07 | 1.16E+08 | 7.29E+07 | 9.42E+07 | 5.17E+07 | 5.48E+07 | 5.55E+07 | 4.81E+07 | 1.24E-01 |          |
| Q14204                                                                         | 6.47E+06 | 4.89E+07 | 1.62E+07 | 1.96E+07 | 6.09E+07 | 1.11E+07 | 8.93E+07 | 6.04E+07 | 7.59E+06 | 3.03E+07 | 4.43E+07 | 0.00E+00 | 1.38E+07 | 8.79E+06 | 0.00E+00 | 4.71E+07 | 2.90E+07 | 3.91E+07 | 1.90E+07 | 2.64E+07 | 3.00E+07 | 1.91E+07 | 1.32E-01 |          |
| Q15149-7;Q15149-8;Q15149-9;Q15149-5;Q15149-4;Q15149-6;Q15149-3;Q15149-2;Q15149 | 5.02E+08 | 2.75E+08 | 2.05E+08 | 2.27E+08 | 1.51E+08 | 0.00E+00 | 2.94E+08 | 2.31E+08 | 4.80E+08 | 2.27E+08 | 3.27E+08 | 6.08E+08 | 3.36E+08 | 3.14E+08 | 2.74E+08 | 2.03E+08 | 2.91E+08 | 2.36E+08 | 3.46E+08 | 1.45E+08 | 1.41E+08 | 1.35E+08 | 1.32E-01 |          |
| P27824;P27824-2;P27824-3;H0Y9Q7                                                | 7.36E+08 | 2.63E+08 | 5.15E+08 | 1.74E+09 | 1.46E+09 | 1.17E+09 | 6.93E+08 | 9.23E+08 | 2.49E+09 | 1.49E+09 | 3.02E+09 | 7.70E+08 | 4.04E+08 | 1.86E+09 | 8.71E+08 | 1.20E+09 | 1.23E+09 | 9.37E+08 | 1.51E+09 | 7.60E+08 | 4.93E+08 | 8.97E+08 | 1.34E-01 |          |
| P13645                                                                         | 1.82E+08 | 9.55E+07 | 1.25E+08 | 1.33E+08 | 1.55E+08 | 2.13E+08 | 9.27E+07 | 1.20E+08 | 3.79E+08 | 3.24E+08 | 0.00E+00 | 3.02E+08 | 2.54E+08 | 3.75E+08 | 2.28E+06 | 1.88E+08 | 1.84E+08 | 1.39E+08 | 2.28E+08 | 1.18E+08 | 4.17E+07 | 1.53E+08 | 1.36E-01 |          |
| Q15084-3;Q15084;Q15084-4;Q15084-5;Q15084-2                                     | 6.77E+06 | 4.04E+06 | 8.02E+06 | 0.00E+00 | 0.00E+00 | 1.11E+07 | 0.00E+00 | 7.02E+06 | 0.00E+00 | 0.00E+00 | 0.00E+00 | 4.86E+06 | 4.20E+06 | 0.00E+00 | 5.71E+06 | 0.00E+00 | 3.23E+06 | 4.62E+06 | 1.85E+06 | 3.70E+06 | 4.28E+06 | 2.58E+06 | 1.39E-01 |          |
| P07339;H7C469;F8WD96;C9JH19;F8W787                                             | 0.00E+00 | 0.00E+00 | 0.00E+00 | 8.53E+06 | 8.13E+06 | 5.72E+06 | 7.81E+06 | 1.29E+07 | 0.00E+00 | 8.04E+06 | 0.00E+00 | 0.00E+00 | 0.00E+00 | 8.31E+06 | 0.00E+00 | 0.00E+00 | 3.71E+06 | 5.38E+06 | 2.04E+06 | 4.56E+06 | 4.88E+06 | 3.79E+06 | 1.48E-01 |          |
| P35998;P35998-2                                                                | 0.00E+00 | 0.00E+00 | 0.00E+00 | 0.00E+00 | 0.00E+00 | 0.00E+00 | 0.00E+00 | 0.00E+00 | 0.00E+00 | 3.11E+06 | 0.00E+00 | 3.08E+06 | 0.00E+00 | 0.00E+00 | 0.00E+00 | 0.00E+00 | 3.87E+05 | 0.00E+00 | 7.74E+05 | 1.06E+06 | 0.00E+00 | 1.43E+06 | 1.49E-01 |          |









|                                                                                            |          |          |          |          |          |          |          |          |          |          |          |          |          |          |          |          |          |          |          |          |          |          |          |          |          |
|--------------------------------------------------------------------------------------------|----------|----------|----------|----------|----------|----------|----------|----------|----------|----------|----------|----------|----------|----------|----------|----------|----------|----------|----------|----------|----------|----------|----------|----------|----------|
| P63244;J3KPE3;HOYAF8;D6RAC2;D6RHH4;HOY8W2;D6R9Z1;HOYAM7;D6R9L0;D6REE5;D6RFX4               | 0.00E+00 | 1.81E+07 | 1.69E+07 | 2.71E+07 | 4.45E+07 | 0.00E+00 | 2.36E+07 | 0.00E+00 | 1.93E+07 | 3.37E+07 | 2.95E+07 | 1.85E+07 | 3.11E+07 | 0.00E+00 | 3.70E+07 | 2.77E+07 | 2.04E+07 | 1.63E+07 | 2.46E+07 | 1.42E+07 | 1.59E+07 | 1.19E+07 | 2.54E-01 |          |          |
| O15382-2;MOQZP4;B3KSI3;O15382;MOQZ10;MOQXF9                                                | 0.00E+00 | 0.00E+00 | 0.00E+00 | 7.60E+05 | 0.00E+00 | 8.98E+05 | 0.00E+00 | 0.00E+00 | 6.91E+05 | 6.56E+05 | 6.91E+05 | 5.47E+05 | 0.00E+00 | 0.00E+00 | 0.00E+00 | 8.53E+05 | 3.19E+05 | 2.07E+05 | 4.30E+05 | 3.81E+05 | 3.85E+05 | 3.66E+05 | 2.55E-01 |          |          |
| P50991;P50991-2                                                                            | 0.00E+00 | 0.00E+00 | 0.00E+00 | 0.00E+00 | 1.29E+07 | 0.00E+00 | 8.39E+06 | 1.34E+07 | 1.52E+07 | 1.34E+07 | 2.85E+07 | 0.00E+00 | 0.00E+00 | 0.00E+00 | 0.00E+00 | 2.05E+07 | 7.02E+06 | 4.33E+06 | 9.70E+06 | 9.21E+06 | 6.16E+06 | 1.13E+07 | 2.57E-01 |          |          |
| Q53GS9-2;A0A087X1B2;Q53GS9-3;B9A018;Q53GS9                                                 | 1.38E+08 | 1.35E+08 | 9.95E+07 | 0.00E+00 | 0.00E+00 | 1.19E+08 | 1.28E+08 | 7.65E+07 | 0.00E+00 | 0.00E+00 | 0.00E+00 | 6.15E+07 | 1.70E+08 | 0.00E+00 | 9.47E+07 | 8.53E+07 | 6.93E+07 | 8.71E+07 | 5.15E+07 | 6.11E+07 | 5.74E+07 | 6.31E+07 | 2.58E-01 |          |          |
| Q15393                                                                                     | 8.30E+07 | 9.49E+07 | 9.18E+07 | 8.74E+07 | 1.09E+08 | 0.00E+00 | 5.98E+07 | 6.47E+07 | 3.20E+07 | 6.46E+07 | 6.95E+07 | 3.59E+07 | 8.91E+07 | 3.67E+07 | 7.23E+07 | 5.87E+07 | 6.55E+07 | 7.38E+07 | 5.73E+07 | 2.83E+07 | 3.37E+07 | 2.06E+07 | 2.59E-01 |          |          |
| P46781;B5MCT8;C9JM19                                                                       | 1.76E+07 | 3.93E+07 | 3.69E+07 | 0.00E+00 | 2.89E+07 | 1.91E+07 | 1.87E+07 | 1.96E+07 | 0.00E+00 | 0.00E+00 | 0.00E+00 | 4.06E+07 | 2.89E+07 | 5.46E+06 | 2.19E+07 | 1.72E+07 | 1.84E+07 | 2.25E+07 | 1.43E+07 | 1.42E+07 | 1.25E+07 | 1.54E+07 | 2.60E-01 |          |          |
| Q08211                                                                                     | 2.02E+07 | 0.00E+00 | 0.00E+00 | 2.27E+07 | 2.32E+07 | 1.92E+07 | 0.00E+00 | 1.34E+07 | 2.36E+07 | 1.75E+07 | 1.93E+07 | 1.71E+07 | 1.49E+07 | 1.68E+07 | 1.14E+07 | 1.53E+07 | 1.47E+07 | 1.23E+07 | 1.70E+07 | 8.03E+06 | 1.06E+07 | 3.55E+06 | 2.61E-01 |          |          |
| P62258;P62258-2                                                                            | 0.00E+00 | 0.00E+00 | 0.00E+00 | 0.00E+00 | 0.00E+00 | 0.00E+00 | 0.00E+00 | 0.00E+00 | 0.00E+00 | 0.00E+00 | 0.00E+00 | 0.00E+00 | 0.00E+00 | 0.00E+00 | 2.96E+06 | 0.00E+00 | 1.87E+07 | 0.00E+00 | 1.36E+06 | 0.00E+00 | 2.71E+06 | 4.69E+06 | 0.00E+00 | 6.56E+06 | 2.62E-01 |
| Q95831-3;Q95831;Q95831-6;Q95831-4                                                          | 0.00E+00 | 0.00E+00 | 0.00E+00 | 0.00E+00 | 0.00E+00 | 8.90E+06 | 5.74E+07 | 0.00E+00 | 0.00E+00 | 0.00E+00 | 0.00E+00 | 0.00E+00 | 0.00E+00 | 0.00E+00 | 0.00E+00 | 0.00E+00 | 0.00E+00 | 4.14E+06 | 8.29E+06 | 0.00E+00 | 1.44E+07 | 2.01E+07 | 0.00E+00 | 2.63E-01 |          |
| Q9BTTO-3;Q9BTTO;E9PPH5;Q5TB19;E9PLC4                                                       | 5.77E+06 | 1.29E+07 | 7.94E+06 | 0.00E+00 | 7.48E+06 | 7.64E+06 | 0.00E+00 | 7.62E+06 | 0.00E+00 | 4.73E+06 | 3.90E+06 | 0.00E+00 | 0.00E+00 | 6.67E+06 | 8.42E+06 | 7.43E+06 | 5.03E+06 | 6.17E+06 | 3.89E+06 | 3.99E+06 | 4.32E+06 | 3.52E+06 | 2.68E-01 |          |          |
| A6NCN2                                                                                     | 0.00E+00 | 0.00E+00 | 1.13E+07 | 0.00E+00 | 0.00E+00 | 0.00E+00 | 0.00E+00 | 0.00E+00 | 1.03E+07 | 1.18E+07 | 0.00E+00 | 0.00E+00 | 0.00E+00 | 1.31E+07 | 0.00E+00 | 0.00E+00 | 2.91E+06 | 1.42E+06 | 4.40E+06 | 5.22E+06 | 4.00E+06 | 6.11E+06 | 2.68E-01 |          |          |
| Q15046;Q15046-2                                                                            | 2.61E+07 | 3.93E+07 | 2.29E+07 | 3.69E+07 | 4.84E+07 | 4.34E+07 | 0.00E+00 | 2.28E+07 | 2.44E+07 | 4.04E+07 | 2.84E+07 | 2.30E+07 | 0.00E+00 | 2.18E+07 | 1.63E+07 | 2.34E+07 | 2.61E+07 | 3.00E+07 | 2.22E+07 | 1.37E+07 | 1.54E+07 | 1.14E+07 | 2.72E-01 |          |          |
| Q9P2E9-3;Q9P2E9-2;Q9P2E9;A0A0A0MRV0;A0A087WV2;F8W7S5                                       | 2.20E+07 | 0.00E+00 | 0.00E+00 | 3.51E+07 | 0.00E+00 | 0.00E+00 | 0.00E+00 | 0.00E+00 | 3.65E+07 | 2.16E+07 | 0.00E+00 | 2.09E+07 | 0.00E+00 | 2.25E+07 | 0.00E+00 | 1.75E+07 | 1.10E+07 | 7.13E+06 | 1.49E+07 | 1.37E+07 | 1.37E+07 | 1.35E+07 | 2.73E-01 |          |          |
| P52272-2;P52272;A0A087X0X3                                                                 | 5.12E+06 | 0.00E+00 | 0.00E+00 | 0.00E+00 | 0.00E+00 | 0.00E+00 | 0.00E+00 | 0.00E+00 | 0.00E+00 | 0.00E+00 | 0.00E+00 | 5.79E+06 | 5.30E+06 | 0.00E+00 | 4.53E+06 | 0.00E+00 | 1.30E+06 | 6.39E+05 | 1.95E+06 | 2.33E+06 | 1.81E+06 | 2.72E+06 | 2.74E-01 |          |          |
| Q9HDC9;Q9HDC9-2;HOY512                                                                     | 8.70E+07 | 5.70E+07 | 1.36E+08 | 5.56E+07 | 1.10E+08 | 4.54E+07 | 0.00E+00 | 7.83E+07 | 3.69E+07 | 6.63E+07 | 8.54E+07 | 4.33E+07 | 4.57E+07 | 3.30E+07 | 5.09E+07 | 6.24E+07 | 6.20E+07 | 7.11E+07 | 5.30E+07 | 3.22E+07 | 4.16E+07 | 1.74E+07 | 2.75E-01 |          |          |
| O43399;O43399-5;A0A087WYR3;O43399-7;O43399-6;O43399-2;O43399-4;O43399-3;A0A087WZ51         | 0.00E+00 | 0.00E+00 | 0.00E+00 | 0.00E+00 | 0.00E+00 | 0.00E+00 | 5.45E+06 | 5.06E+06 | 0.00E+00 | 0.00E+00 | 0.00E+00 | 0.00E+00 | 3.99E+06 | 6.64E+06 | 5.14E+06 | 8.29E+06 | 2.16E+06 | 1.31E+06 | 3.01E+06 | 3.01E+06 | 2.44E+06 | 3.44E+06 | 2.75E-01 |          |          |
| P15311;E7EQR4                                                                              | 2.27E+07 | 2.40E+07 | 2.15E+07 | 0.00E+00 | 1.70E+07 | 1.95E+07 | 0.00E+00 | 4.95E+07 | 0.00E+00 | 0.00E+00 | 0.00E+00 | 1.51E+07 | 2.31E+07 | 1.89E+07 | 1.91E+07 | 1.89E+07 | 1.56E+07 | 1.93E+07 | 1.19E+07 | 1.32E+07 | 1.56E+07 | 1.01E+07 | 2.80E-01 |          |          |
| Q9BXP5-5;Q9BXP5-4;Q9BXP5-2;Q9BXP5-3;Q9BXP5;H7C3A1                                          | 0.00E+00 | 0.00E+00 | 0.00E+00 | 0.00E+00 | 3.93E+06 | 0.00E+00 | 0.00E+00 | 9.04E+06 | 0.00E+00 | 7.43E+06 | 0.00E+00 | 0.00E+00 | 0.00E+00 | 3.99E+06 | 1.45E+07 | 6.67E+06 | 2.84E+06 | 1.62E+06 | 4.07E+06 | 4.41E+06 | 3.30E+06 | 5.24E+06 | 2.82E-01 |          |          |
| A0A087WVU8;P06753-5;P06753-2;Q5HYB6;P06753-4;P06753-3;P06753-6;Q5VU61;D6R904;J3KN67;P06753 | 7.62E+07 | 1.10E+08 | 9.49E+07 | 8.78E+07 | 1.08E+08 | 8.71E+07 | 1.54E+08 | 1.26E+08 | 4.11E+07 | 1.04E+08 | 9.05E+07 | 1.93E+07 | 1.03E+08 | 5.32E+07 | 1.30E+08 | 1.44E+08 | 9.54E+07 | 1.05E+08 | 8.56E+07 | 3.59E+07 | 2.49E+07 | 4.38E+07 | 2.86E-01 |          |          |
| Q9BXW7-2;Q9BXW7                                                                            | 0.00E+00 | 1.34E+07 | 1.62E+07 | 0.00E+00 | 0.00E+00 | 7.40E+06 | 1.70E+07 | 1.93E+07 | 0.00E+00 | 6.32E+06 | 0.00E+00 | 8.23E+06 | 9.92E+06 | 0.00E+00 | 7.37E+06 | 1.14E+07 | 7.29E+06 | 9.17E+06 | 5.41E+06 | 6.84E+06 | 8.35E+06 | 4.74E+06 | 2.87E-01 |          |          |
| P49327                                                                                     | 0.00E+00 | 0.00E+00 | 0.00E+00 | 0.00E+00 | 0.00E+00 | 0.00E+00 | 1.07E+07 | 1.19E+07 | 1.06E+07 | 1.20E+07 | 0.00E+00 | 1.65E+07 | 0.00E+00 | 0.00E+00 | 0.00E+00 | 9.73E+06 | 4.46E+06 | 2.82E+06 | 6.10E+06 | 6.11E+06 | 5.24E+06 | 6.81E+06 | 2.99E-01 |          |          |
| P32119;A6NIW5                                                                              | 0.00E+00 | 0.00E+00 | 7.04E+06 | 0.00E+00 | 0.00E+00 | 5.09E+06 | 0.00E+00 | 0.00E+00 | 0.00E+00 | 0.00E+00 | 0.00E+00 | 1.43E+07 | 0.00E+00 | 6.89E+06 | 0.00E+00 | 1.08E+07 | 2.76E+06 | 1.52E+06 | 4.00E+06 | 4.64E+06 | 2.86E+06 | 5.86E+06 | 3.00E-01 |          |          |
| Q5JRX3;Q5JRX3-2;Q5JRX3-3                                                                   | 0.00E+00 | 1.44E+07 | 0.00E+00 | 0.00E+00 | 5.90E+06 | 0.00E+00 | 0.00E+00 | 0.00E+00 | 0.00E+00 | 1.40E+07 | 6.39E+06 | 0.00E+00 | 8.65E+06 | 0.00E+00 | 5.92E+06 | 7.22E+06 | 3.91E+06 | 2.54E+06 | 5.27E+06 | 5.15E+06 | 5.23E+06 | 5.02E+06 | 3.05E-01 |          |          |

|                                                                                                                |          |          |          |          |          |          |          |          |          |          |          |          |          |          |          |          |          |          |          |          |          |          |          |          |          |
|----------------------------------------------------------------------------------------------------------------|----------|----------|----------|----------|----------|----------|----------|----------|----------|----------|----------|----------|----------|----------|----------|----------|----------|----------|----------|----------|----------|----------|----------|----------|----------|
| P08574                                                                                                         | 0.00E+00 | 0.00E+00 | 0.00E+00 | 0.00E+00 | 0.00E+00 | 6.46E+06 | 0.00E+00 | 0.00E+00 | 0.00E+00 | 0.00E+00 | 0.00E+00 | 0.00E+00 | 0.00E+00 | 0.00E+00 | 1.60E+07 | 0.00E+00 | 1.08E+07 | 2.08E+06 | 8.08E+05 | 3.35E+06 | 4.80E+06 | 2.28E+06 | 6.36E+06 | 3.05E-01 |          |
| P22102                                                                                                         | 0.00E+00 | 1.67E+07 | 0.00E+00 | 0.00E+00 | 0.00E+00 | 1.41E+07 | 5.74E+08 | 0.00E+00 | 0.00E+00 | 0.00E+00 | 0.00E+00 | 0.00E+00 | 0.00E+00 | 0.00E+00 | 0.00E+00 | 0.00E+00 | 0.00E+00 | 3.78E+07 | 7.56E+07 | 0.00E+00 | 1.43E+08 | 2.01E+08 | 0.00E+00 | 3.07E-01 |          |
| Q16629-3;Q16629-2;Q16629-4;C9JAB2;Q16629                                                                       | 1.33E+07 | 0.00E+00 | 0.00E+00 | 2.09E+07 | 1.67E+07 | 2.41E+07 | 1.90E+07 | 2.07E+07 | 1.54E+07 | 1.81E+07 | 0.00E+00 | 1.66E+07 | 0.00E+00 | 1.28E+07 | 0.00E+00 | 1.47E+07 | 1.20E+07 | 1.43E+07 | 9.69E+06 | 8.83E+06 | 9.39E+06 | 8.17E+06 | 3.10E-01 |          |          |
| Q15323;O76009                                                                                                  | 0.00E+00 | 1.76E+07 | 0.00E+00 | 0.00E+00 | 0.00E+00 | 0.00E+00 | 4.34E+08 | 0.00E+00 | 0.00E+00 | 0.00E+00 | 0.00E+00 | 0.00E+00 | 0.00E+00 | 0.00E+00 | 0.00E+00 | 0.00E+00 | 0.00E+00 | 2.82E+07 | 5.65E+07 | 0.00E+00 | 1.08E+08 | 1.53E+08 | 0.00E+00 | 3.13E-01 |          |
| P42765;K7EMEO                                                                                                  | 0.00E+00 | 0.00E+00 | 0.00E+00 | 0.00E+00 | 0.00E+00 | 0.00E+00 | 0.00E+00 | 4.48E+06 | 0.00E+00 | 0.00E+00 | 0.00E+00 | 0.00E+00 | 0.00E+00 | 7.65E+06 | 0.00E+00 | 0.00E+00 | 9.64E+06 | 1.36E+06 | 5.60E+05 | 2.16E+06 | 3.07E+06 | 1.58E+06 | 4.04E+06 | 3.14E-01 |          |
| P78386;F5GYI5                                                                                                  | 0.00E+00 | 0.00E+00 | 3.48E+06 | 0.00E+00 | 0.00E+00 | 0.00E+00 | 0.00E+00 | 2.03E+06 | 1.35E+06 | 0.00E+00 | 0.00E+00 | 0.00E+00 | 0.00E+00 | 0.00E+00 | 0.00E+00 | 0.00E+00 | 0.00E+00 | 4.29E+05 | 6.89E+05 | 1.68E+05 | 1.00E+06 | 1.33E+06 | 4.76E+05 | 3.16E-01 |          |
| B1ALA9;P60891-2;P60891;P21108;P11908;P11908-2;B7ZB02;H7C540                                                    | 2.43E+07 | 4.18E+07 | 0.00E+00 | 0.00E+00 | 3.78E+07 | 0.00E+00 | 4.69E+07 | 2.66E+07 | 2.41E+07 | 3.06E+07 | 2.46E+07 | 2.83E+07 | 4.23E+07 | 2.00E+07 | 3.40E+07 | 3.52E+07 | 2.60E+07 | 2.22E+07 | 2.99E+07 | 1.49E+07 | 1.98E+07 | 7.19E+06 | 3.18E-01 |          |          |
| P50995-2;P50995                                                                                                | 0.00E+00 | 0.00E+00 | 0.00E+00 | 0.00E+00 | 0.00E+00 | 0.00E+00 | 4.90E+06 | 3.39E+06 | 0.00E+00 | 0.00E+00 | 0.00E+00 | 0.00E+00 | 0.00E+00 | 2.15E+06 | 0.00E+00 | 0.00E+00 | 0.00E+00 | 6.52E+05 | 1.04E+06 | 2.69E+05 | 1.49E+06 | 1.96E+06 | 7.60E+05 | 3.19E-01 |          |
| Q13200;Q13200-3;Q13200-2                                                                                       | 0.00E+00 | 1.88E+07 | 1.50E+07 | 1.02E+07 | 1.65E+07 | 9.49E+06 | 0.00E+00 | 1.22E+07 | 0.00E+00 | 0.00E+00 | 0.00E+00 | 0.00E+00 | 7.65E+06 | 1.08E+07 | 0.00E+00 | 1.84E+07 | 1.51E+07 | 8.39E+06 | 1.03E+07 | 6.49E+06 | 7.36E+06 | 7.07E+06 | 7.60E+06 | 3.20E-01 |          |
| Q16795                                                                                                         | 8.26E+06 | 1.74E+07 | 1.69E+07 | 1.96E+07 | 3.11E+07 | 1.32E+07 | 1.12E+07 | 2.02E+07 | 1.42E+07 | 2.62E+07 | 1.13E+07 | 8.22E+06 | 6.98E+06 | 0.00E+00 | 1.74E+07 | 2.20E+07 | 1.53E+07 | 1.72E+07 | 1.33E+07 | 7.78E+06 | 6.96E+06 | 8.51E+06 | 3.28E-01 |          |          |
| P26038                                                                                                         | 9.12E+06 | 1.67E+07 | 1.04E+07 | 0.00E+00 | 1.00E+07 | 0.00E+00 | 9.70E+06 | 1.46E+07 | 6.63E+06 | 1.36E+07 | 9.55E+06 | 0.00E+00 | 2.17E+07 | 1.04E+07 | 2.03E+07 | 1.49E+07 | 1.05E+07 | 8.82E+06 | 1.21E+07 | 6.61E+06 | 6.04E+06 | 7.13E+06 | 3.32E-01 |          |          |
| P40227;P40227-2                                                                                                | 0.00E+00 | 0.00E+00 | 0.00E+00 | 0.00E+00 | 4.17E+06 | 0.00E+00 | 0.00E+00 | 0.00E+00 | 0.00E+00 | 0.00E+00 | 0.00E+00 | 0.00E+00 | 0.00E+00 | 0.00E+00 | 0.00E+00 | 0.00E+00 | 0.00E+00 | 2.60E+05 | 5.21E+05 | 0.00E+00 | 1.04E+06 | 1.47E+06 | 0.00E+00 | 3.34E-01 |          |
| O75694-2;O75694;E9PF10                                                                                         | 0.00E+00 | 0.00E+00 | 0.00E+00 | 0.00E+00 | 0.00E+00 | 0.00E+00 | 0.00E+00 | 0.00E+00 | 0.00E+00 | 0.00E+00 | 0.00E+00 | 0.00E+00 | 0.00E+00 | 0.00E+00 | 0.00E+00 | 2.71E+06 | 0.00E+00 | 1.70E+05 | 0.00E+00 | 3.39E+05 | 6.79E+05 | 0.00E+00 | 9.60E+05 | 3.34E-01 |          |
| P06493;A0A024QZP7;A0A087WY43;E5RIU6;A0A087WZZ9;P06493-2                                                        | 0.00E+00 | 0.00E+00 | 0.00E+00 | 1.41E+06 | 0.00E+00 | 0.00E+00 | 0.00E+00 | 0.00E+00 | 0.00E+00 | 0.00E+00 | 0.00E+00 | 0.00E+00 | 0.00E+00 | 0.00E+00 | 0.00E+00 | 0.00E+00 | 0.00E+00 | 8.79E+04 | 1.76E+05 | 0.00E+00 | 3.52E+05 | 4.97E+05 | 0.00E+00 | 3.34E-01 |          |
| P35237;A0A024QZX5;A0A087X1N8                                                                                   | 3.84E+06 | 0.00E+00 | 0.00E+00 | 0.00E+00 | 0.00E+00 | 0.00E+00 | 0.00E+00 | 0.00E+00 | 0.00E+00 | 0.00E+00 | 0.00E+00 | 0.00E+00 | 0.00E+00 | 0.00E+00 | 0.00E+00 | 0.00E+00 | 0.00E+00 | 2.40E+05 | 4.80E+05 | 0.00E+00 | 9.59E+05 | 1.36E+06 | 0.00E+00 | 3.34E-01 |          |
| Q9H4M9;A0A024R571;C9JDQ8;C9J2Z4;C9JC03;Q9NZN3                                                                  | 0.00E+00 | 0.00E+00 | 0.00E+00 | 2.61E+08 | 0.00E+00 | 0.00E+00 | 0.00E+00 | 0.00E+00 | 0.00E+00 | 0.00E+00 | 0.00E+00 | 0.00E+00 | 0.00E+00 | 0.00E+00 | 0.00E+00 | 0.00E+00 | 0.00E+00 | 1.63E+07 | 3.26E+07 | 0.00E+00 | 6.52E+07 | 9.22E+07 | 0.00E+00 | 3.34E-01 |          |
| A0A075B6F6;Q8TCT9-5;Q8TCT9;Q8TCT9-4;Q8TCT9-2                                                                   | 0.00E+00 | 0.00E+00 | 0.00E+00 | 0.00E+00 | 0.00E+00 | 0.00E+00 | 0.00E+00 | 0.00E+00 | 0.00E+00 | 0.00E+00 | 8.28E+05 | 0.00E+00 | 0.00E+00 | 0.00E+00 | 0.00E+00 | 0.00E+00 | 0.00E+00 | 5.17E+04 | 0.00E+00 | 1.03E+05 | 2.07E+05 | 0.00E+00 | 2.93E+05 | 3.34E-01 |          |
| P11532-3;P11532-2;P11532-4;A0A087WV90;E9PDN5;A0A087WTU7;P11532;A0A075B6G3                                      | 0.00E+00 | 0.00E+00 | 0.00E+00 | 0.00E+00 | 1.33E+07 | 0.00E+00 | 0.00E+00 | 0.00E+00 | 0.00E+00 | 0.00E+00 | 0.00E+00 | 0.00E+00 | 0.00E+00 | 0.00E+00 | 0.00E+00 | 0.00E+00 | 0.00E+00 | 8.29E+05 | 1.66E+06 | 0.00E+00 | 3.32E+06 | 4.69E+06 | 0.00E+00 | 3.34E-01 |          |
| E9PKG6;V9HW75;P80303-2;P80303;A0A087WSV8;H0YD18;HOYEG8;Q2L696                                                  | 0.00E+00 | 0.00E+00 | 0.00E+00 | 0.00E+00 | 0.00E+00 | 0.00E+00 | 0.00E+00 | 0.00E+00 | 0.00E+00 | 0.00E+00 | 0.00E+00 | 0.00E+00 | 0.00E+00 | 0.00E+00 | 0.00E+00 | 0.00E+00 | 0.00E+00 | 2.75E+05 | 1.72E+04 | 0.00E+00 | 3.44E+04 | 6.88E+04 | 0.00E+00 | 9.73E+04 | 3.34E-01 |
| E9PIR7;F8W809;Q16881-5;Q16881-2;A0A087WSW9;Q16881-4;E9PNC6;Q16881-5;Q16881-6;Q16881;A0A087WSY9;E2QRB9;Q16881-7 | 0.00E+00 | 0.00E+00 | 0.00E+00 | 0.00E+00 | 0.00E+00 | 0.00E+00 | 4.52E+06 | 0.00E+00 | 0.00E+00 | 0.00E+00 | 0.00E+00 | 0.00E+00 | 0.00E+00 | 0.00E+00 | 0.00E+00 | 0.00E+00 | 0.00E+00 | 2.83E+05 | 5.65E+05 | 0.00E+00 | 1.13E+06 | 1.60E+06 | 0.00E+00 | 3.34E-01 |          |
| A0A087WT34;A0A087X1H1;A0A0A0MTS6;K7EIE8;O95983-2;O95983                                                        | 0.00E+00 | 0.00E+00 | 0.00E+00 | 0.00E+00 | 0.00E+00 | 0.00E+00 | 0.00E+00 | 0.00E+00 | 0.00E+00 | 0.00E+00 | 0.00E+00 | 0.00E+00 | 1.40E+06 | 0.00E+00 | 0.00E+00 | 0.00E+00 | 0.00E+00 | 8.74E+04 | 0.00E+00 | 1.75E+05 | 3.50E+05 | 0.00E+00 | 4.94E+05 | 3.34E-01 |          |
| A0A087WU9;Q92797                                                                                               | 0.00E+00 | 1.59E+07 | 0.00E+00 | 0.00E+00 | 0.00E+00 | 0.00E+00 | 0.00E+00 | 0.00E+00 | 0.00E+00 | 0.00E+00 | 0.00E+00 | 0.00E+00 | 0.00E+00 | 0.00E+00 | 0.00E+00 | 0.00E+00 | 0.00E+00 | 9.93E+05 | 1.99E+06 | 0.00E+00 | 3.97E+06 | 5.62E+06 | 0.00E+00 | 3.34E-01 |          |



|                                                                      |          |          |          |          |          |          |          |          |          |          |          |          |          |          |          |          |          |          |          |          |          |          |          |          |          |
|----------------------------------------------------------------------|----------|----------|----------|----------|----------|----------|----------|----------|----------|----------|----------|----------|----------|----------|----------|----------|----------|----------|----------|----------|----------|----------|----------|----------|----------|
| O14979-3;O14979-2;A0A087WUK2;O14979                                  | 0.00E+00 | 2.95E+06 | 0.00E+00 | 0.00E+00 | 0.00E+00 | 0.00E+00 | 0.00E+00 | 0.00E+00 | 0.00E+00 | 0.00E+00 | 0.00E+00 | 0.00E+00 | 0.00E+00 | 0.00E+00 | 0.00E+00 | 0.00E+00 | 0.00E+00 | 1.84E+05 | 3.68E+05 | 0.00E+00 | 7.36E+05 | 1.04E+06 | 0.00E+00 | 3.34E-01 |          |
| O60841;A0A087WUT6                                                    | 0.00E+00 | 0.00E+00 | 0.00E+00 | 0.00E+00 | 0.00E+00 | 0.00E+00 | 0.00E+00 | 0.00E+00 | 0.00E+00 | 0.00E+00 | 0.00E+00 | 0.00E+00 | 0.00E+00 | 0.00E+00 | 0.00E+00 | 0.00E+00 | 0.00E+00 | 1.90E+05 | 0.00E+00 | 3.80E+05 | 7.60E+05 | 0.00E+00 | 1.07E+06 | 3.34E-01 |          |
| A0A087WV66;P46013;P46013-2                                           | 0.00E+00 | 0.00E+00 | 0.00E+00 | 0.00E+00 | 0.00E+00 | 0.00E+00 | 0.00E+00 | 0.00E+00 | 0.00E+00 | 0.00E+00 | 0.00E+00 | 0.00E+00 | 0.00E+00 | 0.00E+00 | 0.00E+00 | 0.00E+00 | 0.00E+00 | 7.72E+04 | 0.00E+00 | 1.54E+05 | 3.09E+05 | 0.00E+00 | 4.37E+05 | 3.34E-01 |          |
| A0A087WVC1;A0A087WV B0;Q9BQ39                                        | 0.00E+00 | 0.00E+00 | 0.00E+00 | 0.00E+00 | 0.00E+00 | 0.00E+00 | 4.66E+06 | 0.00E+00 | 0.00E+00 | 0.00E+00 | 0.00E+00 | 0.00E+00 | 0.00E+00 | 0.00E+00 | 0.00E+00 | 0.00E+00 | 0.00E+00 | 2.91E+05 | 5.83E+05 | 0.00E+00 | 1.17E+06 | 1.65E+06 | 0.00E+00 | 3.34E-01 |          |
| Q5JPE7-3;A0A087WW46;Q5JPE7-2;Q15155;P69849;Q5JPE7 ;J3KN36;A0A087X117 | 0.00E+00 | 0.00E+00 | 0.00E+00 | 0.00E+00 | 0.00E+00 | 0.00E+00 | 7.70E+05 | 0.00E+00 | 0.00E+00 | 0.00E+00 | 0.00E+00 | 0.00E+00 | 0.00E+00 | 0.00E+00 | 0.00E+00 | 0.00E+00 | 0.00E+00 | 4.82E+04 | 9.63E+04 | 0.00E+00 | 1.93E+05 | 2.72E+05 | 0.00E+00 | 3.34E-01 |          |
| Q99460-2;Q99460;A0A087WW66; H7C378                                   | 0.00E+00 | 0.00E+00 | 0.00E+00 | 0.00E+00 | 0.00E+00 | 0.00E+00 | 0.00E+00 | 1.45E+06 | 0.00E+00 | 0.00E+00 | 0.00E+00 | 0.00E+00 | 0.00E+00 | 0.00E+00 | 0.00E+00 | 0.00E+00 | 0.00E+00 | 9.07E+04 | 1.81E+05 | 0.00E+00 | 3.63E+05 | 5.13E+05 | 0.00E+00 | 3.34E-01 |          |
| A0A087WX58;K7EPS6;Q7 Z4V5-2;Q7Z4V5                                   | 0.00E+00 | 0.00E+00 | 0.00E+00 | 0.00E+00 | 0.00E+00 | 0.00E+00 | 0.00E+00 | 0.00E+00 | 0.00E+00 | 0.00E+00 | 0.00E+00 | 0.00E+00 | 0.00E+00 | 0.00E+00 | 0.00E+00 | 0.00E+00 | 1.20E+07 | 7.50E+05 | 0.00E+00 | 1.50E+06 | 3.00E+06 | 0.00E+00 | 4.24E+06 | 3.34E-01 |          |
| O95299;A0A087WXC5;E7 ESZ7;O95299-2;Q8N1B9;C9J6X0                     | 0.00E+00 | 0.00E+00 | 0.00E+00 | 0.00E+00 | 0.00E+00 | 0.00E+00 | 0.00E+00 | 0.00E+00 | 0.00E+00 | 0.00E+00 | 7.47E+06 | 0.00E+00 | 0.00E+00 | 0.00E+00 | 0.00E+00 | 0.00E+00 | 0.00E+00 | 4.67E+05 | 0.00E+00 | 9.34E+05 | 1.87E+06 | 0.00E+00 | 2.64E+06 | 3.34E-01 |          |
| P18564-2;A0A087WXP3;E9PEE8; P18564                                   | 0.00E+00 | 0.00E+00 | 0.00E+00 | 0.00E+00 | 0.00E+00 | 0.00E+00 | 0.00E+00 | 5.18E+05 | 0.00E+00 | 0.00E+00 | 0.00E+00 | 0.00E+00 | 0.00E+00 | 0.00E+00 | 0.00E+00 | 0.00E+00 | 0.00E+00 | 3.23E+04 | 6.47E+04 | 0.00E+00 | 1.29E+05 | 1.83E+05 | 0.00E+00 | 3.34E-01 |          |
| A0A087WX57;O43681                                                    | 0.00E+00 | 0.00E+00 | 0.00E+00 | 0.00E+00 | 0.00E+00 | 0.00E+00 | 0.00E+00 | 0.00E+00 | 0.00E+00 | 0.00E+00 | 0.00E+00 | 3.97E+05 | 0.00E+00 | 0.00E+00 | 0.00E+00 | 0.00E+00 | 0.00E+00 | 2.48E+04 | 0.00E+00 | 4.97E+04 | 9.93E+04 | 0.00E+00 | 1.40E+05 | 3.34E-01 |          |
| A0A087WY55;Q9NP79                                                    | 0.00E+00 | 0.00E+00 | 0.00E+00 | 0.00E+00 | 0.00E+00 | 0.00E+00 | 1.06E+06 | 0.00E+00 | 0.00E+00 | 0.00E+00 | 0.00E+00 | 0.00E+00 | 0.00E+00 | 0.00E+00 | 0.00E+00 | 0.00E+00 | 0.00E+00 | 6.61E+04 | 1.32E+05 | 0.00E+00 | 2.64E+05 | 3.74E+05 | 0.00E+00 | 3.34E-01 |          |
| Q14980-4;Q14980-3;A0A087WY61;Q14980-2;Q14980;H0YFY6                  | 0.00E+00 | 0.00E+00 | 0.00E+00 | 0.00E+00 | 0.00E+00 | 0.00E+00 | 1.86E+06 | 0.00E+00 | 0.00E+00 | 0.00E+00 | 0.00E+00 | 0.00E+00 | 0.00E+00 | 0.00E+00 | 0.00E+00 | 0.00E+00 | 0.00E+00 | 1.16E+05 | 2.33E+05 | 0.00E+00 | 4.66E+05 | 6.59E+05 | 0.00E+00 | 3.34E-01 |          |
| Q6ICJ4;A0A087WY67;P0 CG30;P0CG29                                     | 0.00E+00 | 0.00E+00 | 0.00E+00 | 0.00E+00 | 0.00E+00 | 0.00E+00 | 6.34E+05 | 0.00E+00 | 0.00E+00 | 0.00E+00 | 0.00E+00 | 0.00E+00 | 0.00E+00 | 0.00E+00 | 0.00E+00 | 0.00E+00 | 0.00E+00 | 3.96E+04 | 7.92E+04 | 0.00E+00 | 1.58E+05 | 2.24E+05 | 0.00E+00 | 3.34E-01 |          |
| H0Y5G9;G3V1R5;A0A087 WYK8;O43847;O43847-2;B1AKJ5                     | 0.00E+00 | 0.00E+00 | 0.00E+00 | 8.85E+06 | 0.00E+00 | 0.00E+00 | 0.00E+00 | 0.00E+00 | 0.00E+00 | 0.00E+00 | 0.00E+00 | 0.00E+00 | 0.00E+00 | 0.00E+00 | 0.00E+00 | 0.00E+00 | 0.00E+00 | 5.53E+05 | 1.11E+06 | 0.00E+00 | 2.21E+06 | 3.13E+06 | 0.00E+00 | 3.34E-01 |          |
| Q7Z478;A0A087WYN9                                                    | 0.00E+00 | 0.00E+00 | 0.00E+00 | 0.00E+00 | 0.00E+00 | 0.00E+00 | 0.00E+00 | 0.00E+00 | 0.00E+00 | 0.00E+00 | 0.00E+00 | 0.00E+00 | 0.00E+00 | 0.00E+00 | 0.00E+00 | 0.00E+00 | 5.22E+06 | 3.26E+05 | 0.00E+00 | 6.53E+05 | 1.31E+06 | 0.00E+00 | 1.85E+06 | 3.34E-01 |          |
| A0A087WYW6;Q96A33-2;Q96A33                                           | 0.00E+00 | 0.00E+00 | 0.00E+00 | 0.00E+00 | 0.00E+00 | 0.00E+00 | 0.00E+00 | 0.00E+00 | 0.00E+00 | 0.00E+00 | 0.00E+00 | 0.00E+00 | 0.00E+00 | 0.00E+00 | 0.00E+00 | 0.00E+00 | 0.00E+00 | 1.33E+06 | 8.30E+04 | 0.00E+00 | 1.66E+05 | 3.32E+05 | 0.00E+00 | 4.70E+05 | 3.34E-01 |
| E5RJTO;A0A087WZK9;O1 5372;B3KS98                                     | 0.00E+00 | 0.00E+00 | 0.00E+00 | 0.00E+00 | 0.00E+00 | 0.00E+00 | 0.00E+00 | 0.00E+00 | 0.00E+00 | 0.00E+00 | 0.00E+00 | 0.00E+00 | 0.00E+00 | 1.85E+06 | 0.00E+00 | 0.00E+00 | 0.00E+00 | 1.16E+05 | 0.00E+00 | 2.31E+05 | 4.63E+05 | 0.00E+00 | 6.54E+05 | 3.34E-01 |          |
| A0A087X2E5;O43837-2;O43837;A0A087WZN1;O 43837-3                      | 0.00E+00 | 0.00E+00 | 0.00E+00 | 4.72E+06 | 0.00E+00 | 0.00E+00 | 0.00E+00 | 0.00E+00 | 0.00E+00 | 0.00E+00 | 0.00E+00 | 0.00E+00 | 0.00E+00 | 0.00E+00 | 0.00E+00 | 0.00E+00 | 0.00E+00 | 2.95E+05 | 5.90E+05 | 0.00E+00 | 1.18E+06 | 1.67E+06 | 0.00E+00 | 3.34E-01 |          |
| M0R061;O14579-3;O14579-2;A0A087X0A;O14579;M0 QXB4                    | 0.00E+00 | 0.00E+00 | 0.00E+00 | 0.00E+00 | 0.00E+00 | 0.00E+00 | 0.00E+00 | 0.00E+00 | 0.00E+00 | 0.00E+00 | 0.00E+00 | 0.00E+00 | 0.00E+00 | 0.00E+00 | 1.86E+06 | 0.00E+00 | 0.00E+00 | 1.16E+05 | 0.00E+00 | 2.32E+05 | 4.65E+05 | 0.00E+00 | 6.57E+05 | 3.34E-01 |          |
| A0A087X0K1;Q9Y376                                                    | 0.00E+00 | 0.00E+00 | 0.00E+00 | 0.00E+00 | 0.00E+00 | 0.00E+00 | 0.00E+00 | 0.00E+00 | 0.00E+00 | 0.00E+00 | 3.96E+06 | 0.00E+00 | 0.00E+00 | 0.00E+00 | 0.00E+00 | 0.00E+00 | 0.00E+00 | 2.47E+05 | 0.00E+00 | 4.95E+05 | 9.90E+05 | 0.00E+00 | 1.40E+06 | 3.34E-01 |          |
| A0A087X176;Q6ZRP7;H0 Y430                                            | 0.00E+00 | 0.00E+00 | 0.00E+00 | 0.00E+00 | 0.00E+00 | 0.00E+00 | 0.00E+00 | 1.14E+06 | 0.00E+00 | 0.00E+00 | 0.00E+00 | 0.00E+00 | 0.00E+00 | 0.00E+00 | 0.00E+00 | 0.00E+00 | 0.00E+00 | 7.12E+04 | 1.42E+05 | 0.00E+00 | 2.85E+05 | 4.03E+05 | 0.00E+00 | 3.34E-01 |          |

|                                                                                                                   |          |          |          |          |          |          |          |          |          |          |          |          |          |          |          |          |          |          |          |          |          |          |          |          |          |
|-------------------------------------------------------------------------------------------------------------------|----------|----------|----------|----------|----------|----------|----------|----------|----------|----------|----------|----------|----------|----------|----------|----------|----------|----------|----------|----------|----------|----------|----------|----------|----------|
| H7C3I1:F6VDH7:Q3KNR6:Q8I2P2:A0A087X1H6:P50502:Q8NFI4                                                              | 0.00E+00 | 0.00E+00 | 0.00E+00 | 0.00E+00 | 0.00E+00 | 0.00E+00 | 0.00E+00 | 0.00E+00 | 0.00E+00 | 0.00E+00 | 0.00E+00 | 0.00E+00 | 0.00E+00 | 1.94E+05 | 0.00E+00 | 0.00E+00 | 0.00E+00 | 0.00E+00 | 1.21E+04 | 0.00E+00 | 2.42E+04 | 4.85E+04 | 0.00E+00 | 6.85E+04 | 3.34E-01 |
| A0A087X1K9:E5RGR0;O75608-2;O75608;E5RJ48                                                                          | 0.00E+00 | 0.00E+00 | 0.00E+00 | 0.00E+00 | 0.00E+00 | 0.00E+00 | 0.00E+00 | 0.00E+00 | 0.00E+00 | 0.00E+00 | 0.00E+00 | 0.00E+00 | 0.00E+00 | 0.00E+00 | 0.00E+00 | 0.00E+00 | 4.37E+06 | 2.73E+05 | 0.00E+00 | 5.46E+05 | 1.09E+06 | 0.00E+00 | 1.55E+06 | 3.34E-01 |          |
| J3KQV6;J3QT67;J3QT66;J3QT69;J3Q150;J3QT43;J3QT95;A0A087X1P5:Q9H9Q2;Q9H9Q2-3;J3KQ41                                | 0.00E+00 | 0.00E+00 | 0.00E+00 | 0.00E+00 | 0.00E+00 | 0.00E+00 | 0.00E+00 | 0.00E+00 | 0.00E+00 | 0.00E+00 | 0.00E+00 | 0.00E+00 | 0.00E+00 | 3.97E+05 | 0.00E+00 | 0.00E+00 | 0.00E+00 | 2.48E+04 | 0.00E+00 | 4.96E+04 | 9.91E+04 | 0.00E+00 | 1.40E+05 | 3.34E-01 |          |
| A0A087X1S2;P67809;H0Y449;C9J5V9                                                                                   | 0.00E+00 | 0.00E+00 | 0.00E+00 | 0.00E+00 | 5.28E+06 | 0.00E+00 | 0.00E+00 | 0.00E+00 | 0.00E+00 | 0.00E+00 | 0.00E+00 | 0.00E+00 | 0.00E+00 | 0.00E+00 | 0.00E+00 | 0.00E+00 | 3.30E+05 | 6.60E+05 | 0.00E+00 | 1.32E+06 | 1.87E+06 | 0.00E+00 | 3.34E-01 |          |          |
| A0A087X271;B4DDF4;Q99439;B4DUT8;K7ES69;A0A087X1X5;H3BV16;Q99439-2                                                 | 0.00E+00 | 0.00E+00 | 0.00E+00 | 0.00E+00 | 2.83E+05 | 0.00E+00 | 0.00E+00 | 0.00E+00 | 0.00E+00 | 0.00E+00 | 0.00E+00 | 0.00E+00 | 0.00E+00 | 0.00E+00 | 0.00E+00 | 0.00E+00 | 1.77E+04 | 3.54E+04 | 0.00E+00 | 7.08E+04 | 1.00E+05 | 0.00E+00 | 3.34E-01 |          |          |
| Q14525;A0A087X2I6                                                                                                 | 0.00E+00 | 0.00E+00 | 0.00E+00 | 0.00E+00 | 1.17E+06 | 0.00E+00 | 0.00E+00 | 0.00E+00 | 0.00E+00 | 0.00E+00 | 0.00E+00 | 0.00E+00 | 0.00E+00 | 0.00E+00 | 0.00E+00 | 0.00E+00 | 7.32E+04 | 1.46E+05 | 0.00E+00 | 2.93E+05 | 4.14E+05 | 0.00E+00 | 3.34E-01 |          |          |
| A0A096LNY5;P30566-2;P30566;A0A0A6YY92;A0A096LP92;B4DEP1;A0A096LPA2;A0A096LP72;A0A096LNY4;A0A096LNY6               | 0.00E+00 | 0.00E+00 | 0.00E+00 | 0.00E+00 | 0.00E+00 | 0.00E+00 | 0.00E+00 | 0.00E+00 | 0.00E+00 | 0.00E+00 | 0.00E+00 | 0.00E+00 | 1.49E+08 | 0.00E+00 | 0.00E+00 | 0.00E+00 | 0.00E+00 | 9.32E+06 | 0.00E+00 | 1.86E+07 | 3.73E+07 | 0.00E+00 | 5.27E+07 | 3.34E-01 |          |
| U3KQC1;K7EIR0;A0A0A0MQU0;Q9BV38                                                                                   | 0.00E+00 | 0.00E+00 | 0.00E+00 | 0.00E+00 | 0.00E+00 | 0.00E+00 | 0.00E+00 | 0.00E+00 | 0.00E+00 | 0.00E+00 | 0.00E+00 | 0.00E+00 | 0.00E+00 | 0.00E+00 | 0.00E+00 | 0.00E+00 | 7.61E+05 | 4.76E+04 | 0.00E+00 | 9.52E+04 | 1.90E+05 | 0.00E+00 | 2.69E+05 | 3.34E-01 |          |
| H0YCI6;A0A0A0MQX4;Q96K9G-5;E9PPN3;Q96KG9-3;E9PS17;E9PK59;Q96KG9-4;Q96KG9-6;Q96KG9-2;Q96KG9                        | 0.00E+00 | 0.00E+00 | 0.00E+00 | 0.00E+00 | 0.00E+00 | 0.00E+00 | 0.00E+00 | 0.00E+00 | 0.00E+00 | 0.00E+00 | 0.00E+00 | 0.00E+00 | 0.00E+00 | 0.00E+00 | 0.00E+00 | 0.00E+00 | 5.67E+05 | 3.54E+04 | 0.00E+00 | 7.08E+04 | 1.42E+05 | 0.00E+00 | 2.00E+05 | 3.34E-01 |          |
| H0YDK8;A0A0A0MR59;E9PR38;Q8TB72-2;Q8TB72-4;Q8TB72-3;Q8TB72;H0YEH2;Q14671-4;Q14671-2;Q14671;Q14671-3;Q5T1Z4;Q5T1Z8 | 0.00E+00 | 2.02E+06 | 0.00E+00 | 0.00E+00 | 0.00E+00 | 0.00E+00 | 0.00E+00 | 0.00E+00 | 0.00E+00 | 0.00E+00 | 0.00E+00 | 0.00E+00 | 0.00E+00 | 0.00E+00 | 0.00E+00 | 0.00E+00 | 0.00E+00 | 1.26E+05 | 2.52E+05 | 0.00E+00 | 5.05E+05 | 7.14E+05 | 0.00E+00 | 3.34E-01 |          |
| H3BRM6;B9ZVX7;P09488-2;Q03013-2;Q5T8R1;Q03013;P46439;P09488;A0A0A0MR85                                            | 0.00E+00 | 0.00E+00 | 0.00E+00 | 9.01E+06 | 0.00E+00 | 0.00E+00 | 0.00E+00 | 0.00E+00 | 0.00E+00 | 0.00E+00 | 0.00E+00 | 0.00E+00 | 0.00E+00 | 0.00E+00 | 0.00E+00 | 0.00E+00 | 0.00E+00 | 5.63E+05 | 1.13E+06 | 0.00E+00 | 2.25E+06 | 3.19E+06 | 0.00E+00 | 3.34E-01 |          |
| M0R3F1;Q9BUJ2-3;Q9BUJ2-4;A0A0A0MRAS;B7Z4B8;Q9BUJ2-2;Q9BUJ2;M0QYZ0                                                 | 0.00E+00 | 0.00E+00 | 0.00E+00 | 0.00E+00 | 0.00E+00 | 0.00E+00 | 0.00E+00 | 0.00E+00 | 0.00E+00 | 0.00E+00 | 0.00E+00 | 0.00E+00 | 0.00E+00 | 0.00E+00 | 0.00E+00 | 0.00E+00 | 4.21E+06 | 2.63E+05 | 0.00E+00 | 5.26E+05 | 1.05E+06 | 0.00E+00 | 1.49E+06 | 3.34E-01 |          |
| G3V5X4;A0A0A0MRE3;Q8WXH0;Q8WXH0-2                                                                                 | 0.00E+00 | 0.00E+00 | 0.00E+00 | 0.00E+00 | 0.00E+00 | 0.00E+00 | 0.00E+00 | 0.00E+00 | 0.00E+00 | 0.00E+00 | 3.48E+05 | 0.00E+00 | 0.00E+00 | 0.00E+00 | 0.00E+00 | 0.00E+00 | 0.00E+00 | 2.18E+04 | 0.00E+00 | 4.35E+04 | 8.71E+04 | 0.00E+00 | 1.23E+05 | 3.34E-01 |          |
| A0A0A0MRH6;Q5JRA6-2;Q5JRA6                                                                                        | 0.00E+00 | 0.00E+00 | 0.00E+00 | 0.00E+00 | 0.00E+00 | 0.00E+00 | 0.00E+00 | 0.00E+00 | 0.00E+00 | 0.00E+00 | 0.00E+00 | 0.00E+00 | 0.00E+00 | 0.00E+00 | 0.00E+00 | 0.00E+00 | 4.82E+06 | 3.01E+05 | 0.00E+00 | 6.02E+05 | 1.20E+06 | 0.00E+00 | 1.70E+06 | 3.34E-01 |          |
| Q13505-3;Q13505;A0A0A0MRK6                                                                                        | 0.00E+00 | 0.00E+00 | 0.00E+00 | 0.00E+00 | 0.00E+00 | 0.00E+00 | 0.00E+00 | 0.00E+00 | 0.00E+00 | 0.00E+00 | 0.00E+00 | 0.00E+00 | 0.00E+00 | 7.84E+05 | 0.00E+00 | 0.00E+00 | 0.00E+00 | 4.90E+04 | 0.00E+00 | 9.80E+04 | 1.96E+05 | 0.00E+00 | 2.77E+05 | 3.34E-01 |          |

|                                                                                                                    |          |          |          |          |          |          |          |          |          |          |          |          |          |          |          |          |          |          |          |          |          |          |          |          |          |
|--------------------------------------------------------------------------------------------------------------------|----------|----------|----------|----------|----------|----------|----------|----------|----------|----------|----------|----------|----------|----------|----------|----------|----------|----------|----------|----------|----------|----------|----------|----------|----------|
| A0A0A0MS41;Q9BWM7;S4R3N9                                                                                           | 0.00E+00 | 0.00E+00 | 5.92E+06 | 0.00E+00 | 0.00E+00 | 0.00E+00 | 0.00E+00 | 0.00E+00 | 0.00E+00 | 0.00E+00 | 0.00E+00 | 0.00E+00 | 0.00E+00 | 0.00E+00 | 0.00E+00 | 0.00E+00 | 0.00E+00 | 3.70E+05 | 7.40E+05 | 0.00E+00 | 1.48E+06 | 2.09E+06 | 0.00E+00 | 3.34E-01 |          |
| P13797-3;F8W8D8;P13797-2;A0A0A0MSQ0;P13797                                                                         | 0.00E+00 | 0.00E+00 | 0.00E+00 | 0.00E+00 | 0.00E+00 | 0.00E+00 | 0.00E+00 | 0.00E+00 | 0.00E+00 | 0.00E+00 | 0.00E+00 | 0.00E+00 | 0.00E+00 | 0.00E+00 | 1.48E+06 | 0.00E+00 | 0.00E+00 | 9.25E+04 | 0.00E+00 | 1.85E+05 | 3.70E+05 | 0.00E+00 | 5.23E+05 | 3.34E-01 |          |
| A0A0A0MT32;Q5T073;P38571-2;P38571                                                                                  | 0.00E+00 | 0.00E+00 | 0.00E+00 | 0.00E+00 | 0.00E+00 | 0.00E+00 | 0.00E+00 | 0.00E+00 | 0.00E+00 | 0.00E+00 | 0.00E+00 | 0.00E+00 | 0.00E+00 | 0.00E+00 | 0.00E+00 | 0.00E+00 | 6.14E+05 | 3.83E+04 | 0.00E+00 | 7.67E+04 | 1.53E+05 | 0.00E+00 | 2.17E+05 | 3.34E-01 |          |
| A0A0A0MT16;Q9NYP7;Q9NYP7-2;Q9NYP7-3                                                                                | 0.00E+00 | 0.00E+00 | 0.00E+00 | 0.00E+00 | 0.00E+00 | 0.00E+00 | 0.00E+00 | 0.00E+00 | 0.00E+00 | 0.00E+00 | 0.00E+00 | 0.00E+00 | 0.00E+00 | 0.00E+00 | 0.00E+00 | 1.30E+05 | 0.00E+00 | 8.13E+03 | 0.00E+00 | 1.63E+04 | 3.25E+04 | 0.00E+00 | 4.60E+04 | 3.34E-01 |          |
| A6NJA2;P54578-2;P54578-3;A0A0A6YYH3;P54578                                                                         | 0.00E+00 | 0.00E+00 | 0.00E+00 | 0.00E+00 | 0.00E+00 | 0.00E+00 | 0.00E+00 | 0.00E+00 | 0.00E+00 | 5.50E+05 | 0.00E+00 | 0.00E+00 | 0.00E+00 | 0.00E+00 | 0.00E+00 | 0.00E+00 | 0.00E+00 | 3.43E+04 | 0.00E+00 | 6.87E+04 | 1.37E+05 | 0.00E+00 | 1.94E+05 | 3.34E-01 |          |
| I3L276;I3L4P8;A0A0A6YY S0;I3L463;I3L159;I3L1F5;P30519;P30519-2;A0A087WT44                                          | 0.00E+00 | 0.00E+00 | 2.01E+06 | 0.00E+00 | 0.00E+00 | 0.00E+00 | 0.00E+00 | 0.00E+00 | 0.00E+00 | 0.00E+00 | 0.00E+00 | 0.00E+00 | 0.00E+00 | 0.00E+00 | 0.00E+00 | 0.00E+00 | 0.00E+00 | 1.26E+05 | 2.52E+05 | 0.00E+00 | 5.04E+05 | 7.12E+05 | 0.00E+00 | 3.34E-01 |          |
| H7BX11;A0FGR8-2;A0FGR8;A0A087WXU3;A0FGR8-6                                                                         | 0.00E+00 | 0.00E+00 | 0.00E+00 | 0.00E+00 | 0.00E+00 | 0.00E+00 | 0.00E+00 | 0.00E+00 | 0.00E+00 | 0.00E+00 | 0.00E+00 | 5.16E+05 | 0.00E+00 | 0.00E+00 | 0.00E+00 | 0.00E+00 | 0.00E+00 | 3.22E+04 | 0.00E+00 | 6.45E+04 | 1.29E+05 | 0.00E+00 | 1.82E+05 | 3.34E-01 |          |
| A6NE76;Q13620-3;Q13620-1;K4DI93;Q13620;A0A087 WVN2;Q13619-2;A0A0A0MR50;Q13619                                      | 0.00E+00 | 0.00E+00 | 0.00E+00 | 0.00E+00 | 0.00E+00 | 0.00E+00 | 0.00E+00 | 0.00E+00 | 0.00E+00 | 0.00E+00 | 0.00E+00 | 0.00E+00 | 0.00E+00 | 0.00E+00 | 0.00E+00 | 0.00E+00 | 9.87E+05 | 6.17E+04 | 0.00E+00 | 1.23E+05 | 2.47E+05 | 0.00E+00 | 3.49E+05 | 3.34E-01 |          |
| A6NHR9-2;A6NHR9                                                                                                    | 0.00E+00 | 2.10E+06 | 0.00E+00 | 0.00E+00 | 0.00E+00 | 0.00E+00 | 0.00E+00 | 0.00E+00 | 0.00E+00 | 0.00E+00 | 0.00E+00 | 0.00E+00 | 0.00E+00 | 0.00E+00 | 0.00E+00 | 0.00E+00 | 0.00E+00 | 1.31E+05 | 2.63E+05 | 0.00E+00 | 5.25E+05 | 7.43E+05 | 0.00E+00 | 3.34E-01 |          |
| A6NKB8;Q9H4A4                                                                                                      | 0.00E+00 | 0.00E+00 | 0.00E+00 | 0.00E+00 | 0.00E+00 | 0.00E+00 | 0.00E+00 | 0.00E+00 | 0.00E+00 | 0.00E+00 | 0.00E+00 | 0.00E+00 | 0.00E+00 | 0.00E+00 | 0.00E+00 | 0.00E+00 | 4.37E+06 | 2.73E+05 | 0.00E+00 | 5.46E+05 | 1.09E+06 | 0.00E+00 | 1.54E+06 | 3.34E-01 |          |
| F6WIT2;Q15257-3;Q15257-2;A6PVN5;Q15257;B7ZBQ 0;A6PVN7;Q68CR8;A6PV N8;C9I276;A6PVN6;Q5T9 49;Q5T948;A6PVN9;Q152 57-4 | 0.00E+00 | 0.00E+00 | 0.00E+00 | 0.00E+00 | 0.00E+00 | 0.00E+00 | 0.00E+00 | 0.00E+00 | 0.00E+00 | 0.00E+00 | 0.00E+00 | 0.00E+00 | 0.00E+00 | 8.73E+05 | 0.00E+00 | 0.00E+00 | 0.00E+00 | 5.45E+04 | 0.00E+00 | 1.09E+05 | 2.18E+05 | 0.00E+00 | 3.09E+05 | 3.34E-01 |          |
| F5H793;C9J7H8;A8MW50;P07195                                                                                        | 0.00E+00 | 0.00E+00 | 0.00E+00 | 0.00E+00 | 0.00E+00 | 0.00E+00 | 0.00E+00 | 0.00E+00 | 6.30E+06 | 0.00E+00 | 0.00E+00 | 0.00E+00 | 0.00E+00 | 0.00E+00 | 0.00E+00 | 0.00E+00 | 0.00E+00 | 3.94E+05 | 7.88E+05 | 0.00E+00 | 1.58E+06 | 2.23E+06 | 0.00E+00 | 3.34E-01 |          |
| F8W808;A8MWP7;P41227 -2;P41227                                                                                     | 0.00E+00 | 0.00E+00 | 0.00E+00 | 0.00E+00 | 0.00E+00 | 0.00E+00 | 0.00E+00 | 0.00E+00 | 0.00E+00 | 0.00E+00 | 0.00E+00 | 0.00E+00 | 0.00E+00 | 0.00E+00 | 0.00E+00 | 0.00E+00 | 0.00E+00 | 1.99E+04 | 0.00E+00 | 3.98E+04 | 7.97E+04 | 0.00E+00 | 1.13E+05 | 3.34E-01 |          |
| A8MXV4                                                                                                             | 0.00E+00 | 0.00E+00 | 0.00E+00 | 0.00E+00 | 6.19E+06 | 0.00E+00 | 0.00E+00 | 0.00E+00 | 0.00E+00 | 0.00E+00 | 0.00E+00 | 0.00E+00 | 0.00E+00 | 0.00E+00 | 0.00E+00 | 0.00E+00 | 0.00E+00 | 3.87E+05 | 7.74E+05 | 0.00E+00 | 1.55E+06 | 2.19E+06 | 0.00E+00 | 3.34E-01 |          |
| J3QR71;J3QR19;J3QKW7; A8MZF9;P55039                                                                                | 0.00E+00 | 0.00E+00 | 0.00E+00 | 0.00E+00 | 0.00E+00 | 1.56E+06 | 0.00E+00 | 0.00E+00 | 0.00E+00 | 0.00E+00 | 0.00E+00 | 0.00E+00 | 0.00E+00 | 0.00E+00 | 0.00E+00 | 0.00E+00 | 0.00E+00 | 9.75E+04 | 1.95E+05 | 0.00E+00 | 3.90E+05 | 5.52E+05 | 0.00E+00 | 3.34E-01 |          |
| Q9Y262-2;Q9Y262;B0QY89;H7C3A 0;C9JHP4;C9K0Q7;B0QY 90                                                               | 0.00E+00 | 0.00E+00 | 0.00E+00 | 0.00E+00 | 0.00E+00 | 3.14E+06 | 0.00E+00 | 0.00E+00 | 0.00E+00 | 0.00E+00 | 0.00E+00 | 0.00E+00 | 0.00E+00 | 0.00E+00 | 0.00E+00 | 0.00E+00 | 0.00E+00 | 1.96E+05 | 3.92E+05 | 0.00E+00 | 7.84E+05 | 1.11E+06 | 0.00E+00 | 3.34E-01 |          |
| B0QYA5;O15371-2;O15371-3;O15371;B0QYA4;B0QY A8;B0QYA6;B0QYA7                                                       | 0.00E+00 | 0.00E+00 | 0.00E+00 | 0.00E+00 | 0.00E+00 | 0.00E+00 | 0.00E+00 | 0.00E+00 | 0.00E+00 | 0.00E+00 | 0.00E+00 | 0.00E+00 | 0.00E+00 | 2.24E+05 | 0.00E+00 | 0.00E+00 | 0.00E+00 | 1.40E+04 | 0.00E+00 | 2.80E+04 | 5.61E+04 | 0.00E+00 | 7.93E+04 | 3.34E-01 |          |
| H7BY36;Q01844-2;Q01844-6;B0QYK0;C9JGE3;Q0184 4-3;Q01844;Q01844-5                                                   | 0.00E+00 | 0.00E+00 | 0.00E+00 | 0.00E+00 | 0.00E+00 | 0.00E+00 | 0.00E+00 | 0.00E+00 | 0.00E+00 | 0.00E+00 | 0.00E+00 | 0.00E+00 | 0.00E+00 | 0.00E+00 | 0.00E+00 | 0.00E+00 | 1.10E+06 | 6.89E+04 | 0.00E+00 | 1.38E+05 | 2.76E+05 | 0.00E+00 | 3.90E+05 | 3.34E-01 |          |
| B1AHA8;P09601                                                                                                      | 0.00E+00 | 0.00E+00 | 0.00E+00 | 0.00E+00 | 0.00E+00 | 1.11E+07 | 0.00E+00 | 0.00E+00 | 0.00E+00 | 0.00E+00 | 0.00E+00 | 0.00E+00 | 0.00E+00 | 0.00E+00 | 0.00E+00 | 0.00E+00 | 0.00E+00 | 6.95E+05 | 1.39E+06 | 0.00E+00 | 2.78E+06 | 3.93E+06 | 0.00E+00 | 3.34E-01 |          |
| B1AJY5;B1AJY7;O75832; B1AJY6;O75832-2                                                                              | 0.00E+00 | 0.00E+00 | 0.00E+00 | 0.00E+00 | 0.00E+00 | 0.00E+00 | 0.00E+00 | 0.00E+00 | 0.00E+00 | 0.00E+00 | 0.00E+00 | 0.00E+00 | 0.00E+00 | 0.00E+00 | 0.00E+00 | 0.00E+00 | 0.00E+00 | 3.65E+06 | 2.28E+05 | 0.00E+00 | 4.57E+05 | 9.14E+05 | 0.00E+00 | 1.29E+06 | 3.34E-01 |
| B1AKD8;Q5TZA2-2;Q5TZA2                                                                                             | 0.00E+00 | 0.00E+00 | 0.00E+00 | 0.00E+00 | 1.60E+06 | 0.00E+00 | 0.00E+00 | 0.00E+00 | 0.00E+00 | 0.00E+00 | 0.00E+00 | 0.00E+00 | 0.00E+00 | 0.00E+00 | 0.00E+00 | 0.00E+00 | 0.00E+00 | 1.00E+05 | 2.00E+05 | 0.00E+00 | 4.01E+05 | 5.67E+05 | 0.00E+00 | 3.34E-01 |          |

|                                                                                                                                            |          |          |          |          |          |          |          |          |          |          |          |          |          |          |          |          |          |          |          |          |          |          |          |          |          |
|--------------------------------------------------------------------------------------------------------------------------------------------|----------|----------|----------|----------|----------|----------|----------|----------|----------|----------|----------|----------|----------|----------|----------|----------|----------|----------|----------|----------|----------|----------|----------|----------|----------|
| B1APM4;P35610-3;P35610-2;P35610                                                                                                            | 0.00E+00 | 0.00E+00 | 0.00E+00 | 0.00E+00 | 0.00E+00 | 0.00E+00 | 0.00E+00 | 0.00E+00 | 0.00E+00 | 0.00E+00 | 0.00E+00 | 0.00E+00 | 1.61E+06 | 0.00E+00 | 0.00E+00 | 0.00E+00 | 0.00E+00 | 1.01E+05 | 0.00E+00 | 2.02E+05 | 4.04E+05 | 0.00E+00 | 5.71E+05 | 3.34E-01 |          |
| B3KWE1;P12081-3;P12081-2;P12081-4;P12081;D6RJE6;E7ETE2;B4E1C5;B4DD8;P49590-2;P49590                                                        | 0.00E+00 | 0.00E+00 | 0.00E+00 | 2.01E+06 | 0.00E+00 | 0.00E+00 | 0.00E+00 | 0.00E+00 | 0.00E+00 | 0.00E+00 | 0.00E+00 | 0.00E+00 | 0.00E+00 | 0.00E+00 | 0.00E+00 | 0.00E+00 | 0.00E+00 | 1.26E+05 | 2.51E+05 | 0.00E+00 | 5.02E+05 | 7.10E+05 | 0.00E+00 | 3.34E-01 |          |
| B4DIP2;Q96RT1-7;Q96RT1-6;Q96RT1-4;Q96RT1-5;Q96RT1-3;Q96RT1-9;Q96RT1-2;Q96RT1;Q96RT1-8                                                      | 0.00E+00 | 0.00E+00 | 0.00E+00 | 0.00E+00 | 0.00E+00 | 0.00E+00 | 1.02E+06 | 0.00E+00 | 0.00E+00 | 0.00E+00 | 0.00E+00 | 0.00E+00 | 0.00E+00 | 0.00E+00 | 0.00E+00 | 0.00E+00 | 0.00E+00 | 6.37E+04 | 1.27E+05 | 0.00E+00 | 2.55E+05 | 3.60E+05 | 0.00E+00 | 3.34E-01 |          |
| B4DJ81;P28331-3;P28331-4;P28331-5;P28331;P28331-2                                                                                          | 0.00E+00 | 0.00E+00 | 0.00E+00 | 0.00E+00 | 0.00E+00 | 0.00E+00 | 4.91E+07 | 0.00E+00 | 0.00E+00 | 0.00E+00 | 0.00E+00 | 0.00E+00 | 0.00E+00 | 0.00E+00 | 0.00E+00 | 0.00E+00 | 0.00E+00 | 3.07E+06 | 6.14E+06 | 0.00E+00 | 1.23E+07 | 1.74E+07 | 0.00E+00 | 3.34E-01 |          |
| Q9UBX3;Q9UBX3-2;B4DLN1;J3L1E8;F6RGN5                                                                                                       | 0.00E+00 | 0.00E+00 | 0.00E+00 | 0.00E+00 | 0.00E+00 | 0.00E+00 | 0.00E+00 | 0.00E+00 | 0.00E+00 | 0.00E+00 | 0.00E+00 | 0.00E+00 | 0.00E+00 | 0.00E+00 | 0.00E+00 | 0.00E+00 | 2.34E+06 | 1.46E+05 | 0.00E+00 | 2.92E+05 | 5.85E+05 | 0.00E+00 | 8.27E+05 | 3.34E-01 |          |
| B8ZZF7;O00338;O00338-2;B4DLP0                                                                                                              | 0.00E+00 | 0.00E+00 | 0.00E+00 | 0.00E+00 | 0.00E+00 | 6.47E+06 | 0.00E+00 | 0.00E+00 | 0.00E+00 | 0.00E+00 | 0.00E+00 | 0.00E+00 | 0.00E+00 | 0.00E+00 | 0.00E+00 | 0.00E+00 | 0.00E+00 | 4.04E+05 | 8.09E+05 | 0.00E+00 | 1.62E+06 | 2.29E+06 | 0.00E+00 | 3.34E-01 |          |
| P61619;B4DR61;P61619-3                                                                                                                     | 0.00E+00 | 0.00E+00 | 0.00E+00 | 0.00E+00 | 0.00E+00 | 1.43E+06 | 0.00E+00 | 0.00E+00 | 0.00E+00 | 0.00E+00 | 0.00E+00 | 0.00E+00 | 0.00E+00 | 0.00E+00 | 0.00E+00 | 0.00E+00 | 0.00E+00 | 8.92E+04 | 1.78E+05 | 0.00E+00 | 3.57E+05 | 5.05E+05 | 0.00E+00 | 3.34E-01 |          |
| P51114-2;B4DXZ6;P51114;E7EU85;E9PFF5;P51114-3                                                                                              | 0.00E+00 | 0.00E+00 | 0.00E+00 | 0.00E+00 | 0.00E+00 | 0.00E+00 | 3.24E+06 | 0.00E+00 | 0.00E+00 | 0.00E+00 | 0.00E+00 | 0.00E+00 | 0.00E+00 | 0.00E+00 | 0.00E+00 | 0.00E+00 | 0.00E+00 | 2.02E+05 | 4.05E+05 | 0.00E+00 | 8.10E+05 | 1.15E+06 | 0.00E+00 | 3.34E-01 |          |
| B4DZG7;P40616-2;P40616;F8VYN9                                                                                                              | 0.00E+00 | 0.00E+00 | 0.00E+00 | 5.23E+06 | 0.00E+00 | 0.00E+00 | 0.00E+00 | 0.00E+00 | 0.00E+00 | 0.00E+00 | 0.00E+00 | 0.00E+00 | 0.00E+00 | 0.00E+00 | 0.00E+00 | 0.00E+00 | 0.00E+00 | 3.27E+05 | 6.54E+05 | 0.00E+00 | 1.31E+06 | 1.85E+06 | 0.00E+00 | 3.34E-01 |          |
| H7C3M2;B5MCW2;H7C422;G5E9G0;P39023                                                                                                         | 0.00E+00 | 0.00E+00 | 0.00E+00 | 0.00E+00 | 2.83E+06 | 0.00E+00 | 0.00E+00 | 0.00E+00 | 0.00E+00 | 0.00E+00 | 0.00E+00 | 0.00E+00 | 0.00E+00 | 0.00E+00 | 0.00E+00 | 0.00E+00 | 0.00E+00 | 1.77E+05 | 3.54E+05 | 0.00E+00 | 7.07E+05 | 1.00E+06 | 0.00E+00 | 3.34E-01 |          |
| P62495-2;B7Z7P8;P62495                                                                                                                     | 0.00E+00 | 0.00E+00 | 0.00E+00 | 0.00E+00 | 0.00E+00 | 0.00E+00 | 0.00E+00 | 0.00E+00 | 0.00E+00 | 0.00E+00 | 0.00E+00 | 0.00E+00 | 3.81E+05 | 0.00E+00 | 0.00E+00 | 0.00E+00 | 0.00E+00 | 2.38E+04 | 0.00E+00 | 4.76E+04 | 9.51E+04 | 0.00E+00 | 1.35E+05 | 3.34E-01 |          |
| B7Z911;P11310;P11310-2;Q5T4U5                                                                                                              | 0.00E+00 | 0.00E+00 | 0.00E+00 | 1.45E+06 | 0.00E+00 | 0.00E+00 | 0.00E+00 | 0.00E+00 | 0.00E+00 | 0.00E+00 | 0.00E+00 | 0.00E+00 | 0.00E+00 | 0.00E+00 | 0.00E+00 | 0.00E+00 | 0.00E+00 | 9.05E+04 | 1.81E+05 | 0.00E+00 | 3.62E+05 | 5.12E+05 | 0.00E+00 | 3.34E-01 |          |
| E9PKN8;B7ZAG4;Q9Y2W6-3;Q5SZR4;Q9Y2W6;F6TB26                                                                                                | 0.00E+00 | 0.00E+00 | 0.00E+00 | 0.00E+00 | 0.00E+00 | 0.00E+00 | 2.14E+07 | 0.00E+00 | 0.00E+00 | 0.00E+00 | 0.00E+00 | 0.00E+00 | 0.00E+00 | 0.00E+00 | 0.00E+00 | 0.00E+00 | 0.00E+00 | 1.34E+06 | 2.67E+06 | 0.00E+00 | 5.34E+06 | 7.56E+06 | 0.00E+00 | 3.34E-01 |          |
| B8ZZC5;B8ZZA8;O94925-3                                                                                                                     | 0.00E+00 | 0.00E+00 | 0.00E+00 | 0.00E+00 | 0.00E+00 | 0.00E+00 | 0.00E+00 | 0.00E+00 | 0.00E+00 | 0.00E+00 | 0.00E+00 | 0.00E+00 | 9.89E+05 | 0.00E+00 | 0.00E+00 | 0.00E+00 | 0.00E+00 | 6.18E+04 | 0.00E+00 | 1.24E+05 | 2.47E+05 | 0.00E+00 | 3.50E+05 | 3.34E-01 |          |
| C4AM86;Q92764                                                                                                                              | 0.00E+00 | 0.00E+00 | 0.00E+00 | 0.00E+00 | 3.85E+06 | 0.00E+00 | 0.00E+00 | 0.00E+00 | 0.00E+00 | 0.00E+00 | 0.00E+00 | 0.00E+00 | 0.00E+00 | 0.00E+00 | 0.00E+00 | 0.00E+00 | 0.00E+00 | 2.41E+05 | 4.81E+05 | 0.00E+00 | 9.63E+05 | 1.36E+06 | 0.00E+00 | 3.34E-01 |          |
| C9IY40;Q5T653                                                                                                                              | 0.00E+00 | 0.00E+00 | 0.00E+00 | 0.00E+00 | 0.00E+00 | 0.00E+00 | 4.34E+05 | 0.00E+00 | 0.00E+00 | 0.00E+00 | 0.00E+00 | 0.00E+00 | 0.00E+00 | 0.00E+00 | 0.00E+00 | 0.00E+00 | 0.00E+00 | 2.71E+04 | 5.42E+04 | 0.00E+00 | 1.08E+05 | 1.53E+05 | 0.00E+00 | 3.34E-01 |          |
| C9IZ41;H0Y2Y8;Q15942                                                                                                                       | 0.00E+00 | 0.00E+00 | 0.00E+00 | 0.00E+00 | 0.00E+00 | 0.00E+00 | 3.46E+06 | 0.00E+00 | 0.00E+00 | 0.00E+00 | 0.00E+00 | 0.00E+00 | 0.00E+00 | 0.00E+00 | 0.00E+00 | 0.00E+00 | 0.00E+00 | 2.16E+05 | 4.32E+05 | 0.00E+00 | 8.64E+05 | 1.22E+06 | 0.00E+00 | 3.34E-01 |          |
| C9JRU6;C9J0B2;C9JUW4;C9J8R4;C9JVE2;Q96GG9                                                                                                  | 0.00E+00 | 0.00E+00 | 0.00E+00 | 0.00E+00 | 0.00E+00 | 0.00E+00 | 9.47E+05 | 0.00E+00 | 0.00E+00 | 0.00E+00 | 0.00E+00 | 0.00E+00 | 0.00E+00 | 0.00E+00 | 0.00E+00 | 0.00E+00 | 0.00E+00 | 5.92E+04 | 1.18E+05 | 0.00E+00 | 2.37E+05 | 3.35E+05 | 0.00E+00 | 3.34E-01 |          |
| Q71UI9-5;Q71UI9-2;C9J0D1;Q99878;Q96KK5;Q71UI9;P0C0S5;Q9BTM1;Q16777;Q93077;Q8IUE6;Q7L7L0;Q6F113;P20671;P0C0S8;P04908;Q96QV6;P16104;Q9BTM1-2 | 0.00E+00 | 0.00E+00 | 0.00E+00 | 0.00E+00 | 0.00E+00 | 0.00E+00 | 0.00E+00 | 0.00E+00 | 0.00E+00 | 0.00E+00 | 0.00E+00 | 7.79E+06 | 0.00E+00 | 0.00E+00 | 0.00E+00 | 0.00E+00 | 0.00E+00 | 4.87E+05 | 0.00E+00 | 9.74E+05 | 1.95E+06 | 0.00E+00 | 2.75E+06 | 3.34E-01 |          |
| C9JIE7;Q10567-4;Q10567-3;Q10567-2;Q10567                                                                                                   | 0.00E+00 | 0.00E+00 | 0.00E+00 | 0.00E+00 | 0.00E+00 | 0.00E+00 | 0.00E+00 | 0.00E+00 | 0.00E+00 | 0.00E+00 | 0.00E+00 | 0.00E+00 | 0.00E+00 | 0.00E+00 | 0.00E+00 | 0.00E+00 | 0.00E+00 | 9.20E+06 | 5.75E+05 | 0.00E+00 | 1.15E+06 | 2.30E+06 | 0.00E+00 | 3.25E+06 | 3.34E-01 |

|                                                                              |          |          |          |          |          |          |          |          |          |          |          |          |          |          |          |          |          |          |          |          |          |          |          |          |          |          |          |
|------------------------------------------------------------------------------|----------|----------|----------|----------|----------|----------|----------|----------|----------|----------|----------|----------|----------|----------|----------|----------|----------|----------|----------|----------|----------|----------|----------|----------|----------|----------|----------|
| C9JJV6;C9JZL8;C9J5M0;<br>C9JC07;Q96S97                                       | 0.00E+00 | 0.00E+00 | 0.00E+00 | 0.00E+00 | 0.00E+00 | 0.00E+00 | 0.00E+00 | 0.00E+00 | 0.00E+00 | 0.00E+00 | 0.00E+00 | 0.00E+00 | 0.00E+00 | 0.00E+00 | 0.00E+00 | 0.00E+00 | 5.84E+05 | 0.00E+00 | 3.65E+04 | 0.00E+00 | 7.29E+04 | 1.46E+05 | 0.00E+00 | 2.06E+05 | 3.34E-01 |          |          |
| C9J719;C9J78;Q15125                                                          | 0.00E+00 | 0.00E+00 | 0.00E+00 | 0.00E+00 | 0.00E+00 | 0.00E+00 | 0.00E+00 | 0.00E+00 | 0.00E+00 | 0.00E+00 | 0.00E+00 | 0.00E+00 | 0.00E+00 | 0.00E+00 | 0.00E+00 | 0.00E+00 | 3.02E+05 | 0.00E+00 | 1.89E+04 | 0.00E+00 | 3.77E+04 | 7.54E+04 | 0.00E+00 | 1.07E+05 | 3.34E-01 |          |          |
| E9PFH4;Q9Y5L0-<br>5;Q9Y5L0-<br>3;Q9Y5L0;Q9Y5L0-<br>1;C9J7E5                  | 0.00E+00 | 0.00E+00 | 0.00E+00 | 0.00E+00 | 0.00E+00 | 0.00E+00 | 0.00E+00 | 0.00E+00 | 0.00E+00 | 0.00E+00 | 0.00E+00 | 0.00E+00 | 0.00E+00 | 0.00E+00 | 0.00E+00 | 0.00E+00 | 0.00E+00 | 4.43E+05 | 2.77E+04 | 0.00E+00 | 5.54E+04 | 1.11E+05 | 0.00E+00 | 1.57E+05 | 3.34E-01 |          |          |
| C9JQM9;C9J7S3;H7C278;<br>C9JLC1;P14868-2;P14868                              | 0.00E+00 | 0.00E+00 | 0.00E+00 | 0.00E+00 | 0.00E+00 | 0.00E+00 | 0.00E+00 | 0.00E+00 | 0.00E+00 | 0.00E+00 | 3.00E+06 | 0.00E+00 | 0.00E+00 | 0.00E+00 | 0.00E+00 | 0.00E+00 | 0.00E+00 | 0.00E+00 | 1.88E+05 | 0.00E+00 | 3.75E+05 | 7.51E+05 | 0.00E+00 | 1.06E+06 | 3.34E-01 |          |          |
| C9J8Q1;F8W9P7;Q9UMS<br>0-2;H7C537;Q9UMS0-<br>3;Q9UMS0                        | 0.00E+00 | 0.00E+00 | 0.00E+00 | 0.00E+00 | 0.00E+00 | 0.00E+00 | 0.00E+00 | 0.00E+00 | 0.00E+00 | 0.00E+00 | 0.00E+00 | 0.00E+00 | 0.00E+00 | 0.00E+00 | 0.00E+00 | 0.00E+00 | 0.00E+00 | 1.60E+06 | 9.98E+04 | 0.00E+00 | 2.00E+05 | 3.99E+05 | 0.00E+00 | 5.64E+05 | 3.34E-01 |          |          |
| C9J9W2;Q14847-<br>3;Q14847;Q14847-2                                          | 0.00E+00 | 0.00E+00 | 0.00E+00 | 0.00E+00 | 0.00E+00 | 0.00E+00 | 0.00E+00 | 0.00E+00 | 0.00E+00 | 0.00E+00 | 0.00E+00 | 0.00E+00 | 0.00E+00 | 3.63E+05 | 0.00E+00 | 0.00E+00 | 0.00E+00 | 0.00E+00 | 0.00E+00 | 2.27E+04 | 0.00E+00 | 4.53E+04 | 9.06E+04 | 0.00E+00 | 1.28E+05 | 3.34E-01 |          |
| C9JNK6;C9JAZ1;O75431-<br>2;O75431                                            | 0.00E+00 | 0.00E+00 | 0.00E+00 | 0.00E+00 | 0.00E+00 | 0.00E+00 | 0.00E+00 | 0.00E+00 | 0.00E+00 | 0.00E+00 | 0.00E+00 | 0.00E+00 | 0.00E+00 | 0.00E+00 | 0.00E+00 | 5.75E+05 | 0.00E+00 | 0.00E+00 | 3.59E+04 | 0.00E+00 | 7.18E+04 | 1.44E+05 | 0.00E+00 | 2.03E+05 | 3.34E-01 |          |          |
| H7C131;C9JDE9;P09110                                                         | 0.00E+00 | 0.00E+00 | 0.00E+00 | 0.00E+00 | 0.00E+00 | 0.00E+00 | 0.00E+00 | 0.00E+00 | 0.00E+00 | 1.54E+06 | 0.00E+00 | 0.00E+00 | 0.00E+00 | 0.00E+00 | 0.00E+00 | 0.00E+00 | 0.00E+00 | 0.00E+00 | 9.60E+04 | 0.00E+00 | 1.92E+05 | 3.84E+05 | 0.00E+00 | 5.43E+05 | 3.34E-01 |          |          |
| C9JG87;Q9NYK5;Q9NYK5<br>-2                                                   | 0.00E+00 | 0.00E+00 | 0.00E+00 | 0.00E+00 | 0.00E+00 | 0.00E+00 | 0.00E+00 | 0.00E+00 | 0.00E+00 | 0.00E+00 | 0.00E+00 | 0.00E+00 | 0.00E+00 | 0.00E+00 | 1.03E+06 | 0.00E+00 | 0.00E+00 | 0.00E+00 | 6.41E+04 | 0.00E+00 | 1.28E+05 | 2.56E+05 | 0.00E+00 | 3.62E+05 | 3.34E-01 |          |          |
| C9JGT6;C9JM55;C9K055;<br>F8W8W4;Q9UHG3-<br>2;Q9UHG3                          | 0.00E+00 | 0.00E+00 | 0.00E+00 | 0.00E+00 | 0.00E+00 | 0.00E+00 | 0.00E+00 | 0.00E+00 | 0.00E+00 | 0.00E+00 | 0.00E+00 | 0.00E+00 | 0.00E+00 | 0.00E+00 | 0.00E+00 | 0.00E+00 | 0.00E+00 | 5.06E+06 | 3.16E+05 | 0.00E+00 | 6.33E+05 | 1.27E+06 | 0.00E+00 | 1.79E+06 | 3.34E-01 |          |          |
| C9JHW1;E7ESB6;Q6Y7W<br>6-4;Q6Y7W6-<br>5;Q6Y7W6;Q6Y7W6-<br>3;11E4Y6           | 0.00E+00 | 0.00E+00 | 0.00E+00 | 0.00E+00 | 0.00E+00 | 0.00E+00 | 0.00E+00 | 0.00E+00 | 0.00E+00 | 0.00E+00 | 0.00E+00 | 0.00E+00 | 0.00E+00 | 0.00E+00 | 0.00E+00 | 0.00E+00 | 1.55E+06 | 0.00E+00 | 9.69E+04 | 0.00E+00 | 1.94E+05 | 3.88E+05 | 0.00E+00 | 5.48E+05 | 3.34E-01 |          |          |
| C9JIS1;C9JXA5;P62879;C<br>9JZN1;E7EP32;Q9HAV0                                | 0.00E+00 | 0.00E+00 | 0.00E+00 | 0.00E+00 | 0.00E+00 | 0.00E+00 | 0.00E+00 | 0.00E+00 | 0.00E+00 | 4.18E+06 | 0.00E+00 | 0.00E+00 | 0.00E+00 | 0.00E+00 | 0.00E+00 | 0.00E+00 | 0.00E+00 | 0.00E+00 | 2.62E+05 | 0.00E+00 | 5.23E+05 | 1.05E+06 | 0.00E+00 | 1.48E+06 | 3.34E-01 |          |          |
| C9JTY3;C9JUE0;C9JJP5;<br>Q92734-4;Q92734-<br>3;Q05BK6;Q92734-<br>2;Q92734    | 0.00E+00 | 0.00E+00 | 0.00E+00 | 0.00E+00 | 0.00E+00 | 0.00E+00 | 0.00E+00 | 0.00E+00 | 0.00E+00 | 1.34E+05 | 0.00E+00 | 0.00E+00 | 0.00E+00 | 0.00E+00 | 0.00E+00 | 0.00E+00 | 0.00E+00 | 0.00E+00 | 0.00E+00 | 8.36E+03 | 0.00E+00 | 1.67E+04 | 3.34E+04 | 0.00E+00 | 4.73E+04 | 3.34E-01 |          |
| C9JKI3;Q03135-<br>2;E9PCT5;Q03135                                            | 0.00E+00 | 0.00E+00 | 0.00E+00 | 0.00E+00 | 0.00E+00 | 0.00E+00 | 0.00E+00 | 0.00E+00 | 0.00E+00 | 0.00E+00 | 0.00E+00 | 0.00E+00 | 0.00E+00 | 0.00E+00 | 0.00E+00 | 1.18E+06 | 0.00E+00 | 0.00E+00 | 7.39E+04 | 0.00E+00 | 1.48E+05 | 2.96E+05 | 0.00E+00 | 4.18E+05 | 3.34E-01 |          |          |
| C9JLF4;Q9NVH0-<br>2;Q9NVH0                                                   | 0.00E+00 | 0.00E+00 | 0.00E+00 | 0.00E+00 | 0.00E+00 | 5.56E+06 | 0.00E+00 | 0.00E+00 | 0.00E+00 | 0.00E+00 | 0.00E+00 | 0.00E+00 | 0.00E+00 | 0.00E+00 | 0.00E+00 | 0.00E+00 | 0.00E+00 | 0.00E+00 | 3.47E+05 | 6.95E+05 | 0.00E+00 | 1.39E+06 | 1.96E+06 | 0.00E+00 | 3.34E-01 |          |          |
| J3QKR0;C9JLV5;Q9UNS2<br>;J3QL22;J3OS85;J3KTQ1;<br>K7ES36;H7C3P9;Q9UNS2<br>-2 | 0.00E+00 | 0.00E+00 | 0.00E+00 | 0.00E+00 | 0.00E+00 | 1.15E+06 | 0.00E+00 | 0.00E+00 | 0.00E+00 | 0.00E+00 | 0.00E+00 | 0.00E+00 | 0.00E+00 | 0.00E+00 | 0.00E+00 | 0.00E+00 | 0.00E+00 | 0.00E+00 | 7.21E+04 | 1.44E+05 | 0.00E+00 | 2.88E+05 | 4.08E+05 | 0.00E+00 | 3.34E-01 |          |          |
| C9JXB8;C9JNW5;P83731                                                         | 0.00E+00 | 0.00E+00 | 0.00E+00 | 0.00E+00 | 0.00E+00 | 0.00E+00 | 0.00E+00 | 0.00E+00 | 1.14E+07 | 0.00E+00 | 0.00E+00 | 0.00E+00 | 0.00E+00 | 0.00E+00 | 0.00E+00 | 0.00E+00 | 0.00E+00 | 0.00E+00 | 0.00E+00 | 7.11E+05 | 1.42E+06 | 0.00E+00 | 2.85E+06 | 4.02E+06 | 0.00E+00 | 3.34E-01 |          |
| C9JU35;Q9NPL8                                                                | 0.00E+00 | 0.00E+00 | 0.00E+00 | 0.00E+00 | 5.26E+06 | 0.00E+00 | 0.00E+00 | 0.00E+00 | 0.00E+00 | 0.00E+00 | 0.00E+00 | 0.00E+00 | 0.00E+00 | 0.00E+00 | 0.00E+00 | 0.00E+00 | 0.00E+00 | 0.00E+00 | 0.00E+00 | 3.29E+05 | 6.58E+05 | 0.00E+00 | 1.32E+06 | 1.86E+06 | 0.00E+00 | 3.34E-01 |          |
| C9JY09;E7ET39;Q8NDZ4-<br>2;Q8NDZ4                                            | 0.00E+00 | 0.00E+00 | 0.00E+00 | 0.00E+00 | 0.00E+00 | 0.00E+00 | 0.00E+00 | 0.00E+00 | 0.00E+00 | 0.00E+00 | 0.00E+00 | 0.00E+00 | 0.00E+00 | 2.77E+06 | 0.00E+00 | 0.00E+00 | 0.00E+00 | 0.00E+00 | 0.00E+00 | 1.73E+05 | 0.00E+00 | 3.47E+05 | 6.93E+05 | 0.00E+00 | 9.80E+05 | 3.34E-01 |          |
| C9JYS8;Q15233-<br>2;Q15233;H7C367                                            | 0.00E+00 | 0.00E+00 | 0.00E+00 | 0.00E+00 | 0.00E+00 | 0.00E+00 | 1.02E+06 | 0.00E+00 | 0.00E+00 | 0.00E+00 | 0.00E+00 | 0.00E+00 | 0.00E+00 | 0.00E+00 | 0.00E+00 | 0.00E+00 | 0.00E+00 | 0.00E+00 | 6.36E+04 | 1.27E+05 | 0.00E+00 | 2.55E+05 | 3.60E+05 | 0.00E+00 | 3.34E-01 |          |          |
| H7C2W1;C9K0G7;E9PCG<br>9;Q02338                                              | 0.00E+00 | 0.00E+00 | 0.00E+00 | 0.00E+00 | 0.00E+00 | 0.00E+00 | 0.00E+00 | 0.00E+00 | 0.00E+00 | 0.00E+00 | 0.00E+00 | 0.00E+00 | 0.00E+00 | 2.32E+06 | 0.00E+00 | 0.00E+00 | 0.00E+00 | 0.00E+00 | 0.00E+00 | 1.45E+05 | 0.00E+00 | 2.90E+05 | 5.79E+05 | 0.00E+00 | 8.19E+05 | 3.34E-01 |          |
| P78344-<br>2;H0Y3P2;P78344;D3DQV<br>9                                        | 0.00E+00 | 0.00E+00 | 0.00E+00 | 0.00E+00 | 0.00E+00 | 0.00E+00 | 0.00E+00 | 0.00E+00 | 0.00E+00 | 0.00E+00 | 0.00E+00 | 0.00E+00 | 0.00E+00 | 0.00E+00 | 0.00E+00 | 0.00E+00 | 0.00E+00 | 0.00E+00 | 2.56E+06 | 0.00E+00 | 1.60E+05 | 0.00E+00 | 3.20E+05 | 6.40E+05 | 0.00E+00 | 9.05E+05 | 3.34E-01 |

|                                                                                                                                     |          |          |          |          |          |          |          |          |          |          |          |          |          |          |          |          |          |          |          |          |          |          |          |          |          |
|-------------------------------------------------------------------------------------------------------------------------------------|----------|----------|----------|----------|----------|----------|----------|----------|----------|----------|----------|----------|----------|----------|----------|----------|----------|----------|----------|----------|----------|----------|----------|----------|----------|
| H7C1W2;E9PF84;G5E9Q7<br>;D3DWV9;E7EQB8;P5155<br>3-2;P51553                                                                          | 0.00E+00 | 0.00E+00 | 0.00E+00 | 0.00E+00 | 2.82E+06 | 0.00E+00 | 0.00E+00 | 0.00E+00 | 0.00E+00 | 0.00E+00 | 0.00E+00 | 0.00E+00 | 0.00E+00 | 0.00E+00 | 0.00E+00 | 0.00E+00 | 0.00E+00 | 1.76E+05 | 3.52E+05 | 0.00E+00 | 7.04E+05 | 9.96E+05 | 0.00E+00 | 3.34E-01 |          |
| Q9BWF3-<br>3;E9PLB0;E9PM61;D6R9K<br>7;U3KQD5;J3QRR5;Q9B<br>WF3-4;Q9BWF3-<br>2;E9PB51;Q9BQ04;Q9BW<br>F3                              | 0.00E+00 | 0.00E+00 | 0.00E+00 | 0.00E+00 | 0.00E+00 | 0.00E+00 | 0.00E+00 | 0.00E+00 | 0.00E+00 | 0.00E+00 | 0.00E+00 | 0.00E+00 | 0.00E+00 | 0.00E+00 | 0.00E+00 | 0.00E+00 | 0.00E+00 | 7.04E+05 | 4.40E+04 | 0.00E+00 | 8.80E+04 | 1.76E+05 | 0.00E+00 | 2.49E+05 | 3.34E-01 |
| P46926-<br>2;D6RAY7;D6R9P4;P4692<br>6;D6RFF8;D6R917;D6RB1<br>3                                                                      | 0.00E+00 | 0.00E+00 | 0.00E+00 | 0.00E+00 | 0.00E+00 | 0.00E+00 | 0.00E+00 | 0.00E+00 | 0.00E+00 | 0.00E+00 | 0.00E+00 | 0.00E+00 | 0.00E+00 | 0.00E+00 | 0.00E+00 | 0.00E+00 | 0.00E+00 | 1.60E+04 | 0.00E+00 | 3.19E+04 | 6.38E+04 | 0.00E+00 | 9.03E+04 | 3.34E-01 |          |
| D6RIZ4;D6RA47;Q14728;<br>D6RE79                                                                                                     | 0.00E+00 | 0.00E+00 | 0.00E+00 | 0.00E+00 | 0.00E+00 | 0.00E+00 | 0.00E+00 | 0.00E+00 | 0.00E+00 | 0.00E+00 | 0.00E+00 | 0.00E+00 | 0.00E+00 | 0.00E+00 | 0.00E+00 | 0.00E+00 | 0.00E+00 | 6.88E+04 | 0.00E+00 | 1.38E+05 | 2.75E+05 | 0.00E+00 | 3.89E+05 | 3.34E-01 |          |
| Q9BT78-<br>2;Q9BT78;D6RAX7;D6RF<br>N0;D6RD63                                                                                        | 0.00E+00 | 0.00E+00 | 0.00E+00 | 0.00E+00 | 0.00E+00 | 0.00E+00 | 0.00E+00 | 3.88E+06 | 0.00E+00 | 0.00E+00 | 0.00E+00 | 0.00E+00 | 0.00E+00 | 0.00E+00 | 0.00E+00 | 0.00E+00 | 0.00E+00 | 2.43E+05 | 4.85E+05 | 0.00E+00 | 9.71E+05 | 1.37E+06 | 0.00E+00 | 3.34E-01 |          |
| D6RDC0;Q14108-<br>2;Q14108                                                                                                          | 0.00E+00 | 0.00E+00 | 0.00E+00 | 0.00E+00 | 0.00E+00 | 0.00E+00 | 0.00E+00 | 0.00E+00 | 0.00E+00 | 0.00E+00 | 0.00E+00 | 0.00E+00 | 0.00E+00 | 0.00E+00 | 0.00E+00 | 0.00E+00 | 0.00E+00 | 2.12E+06 | 1.33E+05 | 0.00E+00 | 2.66E+05 | 5.31E+05 | 0.00E+00 | 7.51E+05 | 3.34E-01 |
| D6RGI3;Q9NVA2;D6RER5<br>;D6RDP1;D6R9Y6;Q14141<br>-3;D6RDU5;Q14141-<br>2;Q14141-<br>4;B1AMS2;Q14141;Q9NV<br>A2-2                     | 0.00E+00 | 0.00E+00 | 0.00E+00 | 4.21E+06 | 0.00E+00 | 0.00E+00 | 0.00E+00 | 0.00E+00 | 0.00E+00 | 0.00E+00 | 0.00E+00 | 0.00E+00 | 0.00E+00 | 0.00E+00 | 0.00E+00 | 0.00E+00 | 0.00E+00 | 2.63E+05 | 5.26E+05 | 0.00E+00 | 1.05E+06 | 1.49E+06 | 0.00E+00 | 3.34E-01 |          |
| HOYAF5;HOY8W8;O94979<br>-7;H7BXG7;O94979-<br>6;O94979-3;O94979-<br>10;O94979-4;O94979-<br>9;O94979-<br>2;O94979;O94979-<br>8;D6REX3 | 0.00E+00 | 0.00E+00 | 0.00E+00 | 0.00E+00 | 0.00E+00 | 0.00E+00 | 0.00E+00 | 0.00E+00 | 0.00E+00 | 0.00E+00 | 0.00E+00 | 0.00E+00 | 0.00E+00 | 0.00E+00 | 0.00E+00 | 0.00E+00 | 0.00E+00 | 3.24E+05 | 0.00E+00 | 6.49E+05 | 1.30E+06 | 0.00E+00 | 1.83E+06 | 3.34E-01 |          |
| D6RH20;G5EA06;Q92552;<br>Q92552-2;D6RJJC7                                                                                           | 3.30E+07 | 0.00E+00 | 0.00E+00 | 0.00E+00 | 0.00E+00 | 0.00E+00 | 0.00E+00 | 0.00E+00 | 0.00E+00 | 0.00E+00 | 0.00E+00 | 0.00E+00 | 0.00E+00 | 0.00E+00 | 0.00E+00 | 0.00E+00 | 0.00E+00 | 2.06E+06 | 4.13E+06 | 0.00E+00 | 8.25E+06 | 1.17E+07 | 0.00E+00 | 3.34E-01 |          |
| D6RHJ3                                                                                                                              | 0.00E+00 | 0.00E+00 | 0.00E+00 | 0.00E+00 | 0.00E+00 | 2.85E+06 | 0.00E+00 | 0.00E+00 | 0.00E+00 | 0.00E+00 | 0.00E+00 | 0.00E+00 | 0.00E+00 | 0.00E+00 | 0.00E+00 | 0.00E+00 | 0.00E+00 | 1.78E+05 | 3.57E+05 | 0.00E+00 | 7.13E+05 | 1.01E+06 | 0.00E+00 | 3.34E-01 |          |
| O60313;E5K1K1;E5K1J6;<br>E5K1J9;O60313-2;E5K1J5                                                                                     | 0.00E+00 | 0.00E+00 | 0.00E+00 | 0.00E+00 | 0.00E+00 | 0.00E+00 | 0.00E+00 | 0.00E+00 | 0.00E+00 | 0.00E+00 | 0.00E+00 | 0.00E+00 | 0.00E+00 | 0.00E+00 | 0.00E+00 | 0.00E+00 | 0.00E+00 | 3.90E+04 | 0.00E+00 | 7.81E+04 | 1.56E+05 | 0.00E+00 | 2.21E+05 | 3.34E-01 |          |
| E5RGA2;P60228;HOYAW4<br>;E5RH55                                                                                                     | 0.00E+00 | 0.00E+00 | 0.00E+00 | 0.00E+00 | 0.00E+00 | 0.00E+00 | 6.60E+06 | 0.00E+00 | 0.00E+00 | 0.00E+00 | 0.00E+00 | 0.00E+00 | 0.00E+00 | 0.00E+00 | 0.00E+00 | 0.00E+00 | 0.00E+00 | 4.13E+05 | 8.25E+05 | 0.00E+00 | 1.65E+06 | 2.33E+06 | 0.00E+00 | 3.34E-01 |          |
| E5RGJ2;Q15006                                                                                                                       | 0.00E+00 | 0.00E+00 | 0.00E+00 | 0.00E+00 | 0.00E+00 | 0.00E+00 | 0.00E+00 | 0.00E+00 | 0.00E+00 | 0.00E+00 | 0.00E+00 | 0.00E+00 | 0.00E+00 | 0.00E+00 | 0.00E+00 | 0.00E+00 | 0.00E+00 | 2.27E+06 | 1.42E+05 | 0.00E+00 | 2.84E+05 | 5.69E+05 | 0.00E+00 | 8.04E+05 | 3.34E-01 |
| E5RH50;Q6PKG0-<br>3;Q6PKG0;HOYC33;HOYC<br>73;HOYBW1                                                                                 | 0.00E+00 | 0.00E+00 | 0.00E+00 | 0.00E+00 | 0.00E+00 | 0.00E+00 | 4.18E+06 | 0.00E+00 | 0.00E+00 | 0.00E+00 | 0.00E+00 | 0.00E+00 | 0.00E+00 | 0.00E+00 | 0.00E+00 | 0.00E+00 | 0.00E+00 | 2.61E+05 | 5.23E+05 | 0.00E+00 | 1.05E+06 | 1.48E+06 | 0.00E+00 | 3.34E-01 |          |
| E5RHF4;Q9P015;E5RIZ4                                                                                                                | 0.00E+00 | 0.00E+00 | 0.00E+00 | 0.00E+00 | 0.00E+00 | 1.04E+06 | 0.00E+00 | 0.00E+00 | 0.00E+00 | 0.00E+00 | 0.00E+00 | 0.00E+00 | 0.00E+00 | 0.00E+00 | 0.00E+00 | 0.00E+00 | 0.00E+00 | 6.51E+04 | 1.30E+05 | 0.00E+00 | 2.61E+05 | 3.69E+05 | 0.00E+00 | 3.34E-01 |          |

|                                                                                                     |          |          |          |          |          |          |          |          |          |          |          |          |          |          |          |          |          |          |          |          |          |          |          |          |          |
|-----------------------------------------------------------------------------------------------------|----------|----------|----------|----------|----------|----------|----------|----------|----------|----------|----------|----------|----------|----------|----------|----------|----------|----------|----------|----------|----------|----------|----------|----------|----------|
| E5RIK2;Q9UQ16-5;E5RHK8;Q9UQ16-2;Q9UQ16-3;P50570-3;P50570-2;Q9UQ16;P50570-5;P50570-4;P50570;Q9UQ16-4 | 0.00E+00 | 0.00E+00 | 0.00E+00 | 0.00E+00 | 0.00E+00 | 0.00E+00 | 0.00E+00 | 0.00E+00 | 0.00E+00 | 0.00E+00 | 0.00E+00 | 0.00E+00 | 0.00E+00 | 0.00E+00 | 0.00E+00 | 0.00E+00 | 0.00E+00 | 3.41E+06 | 2.13E+05 | 0.00E+00 | 4.26E+05 | 8.52E+05 | 0.00E+00 | 1.20E+06 | 3.34E-01 |
| E5RHW4;Q94905;E5RJ09                                                                                | 0.00E+00 | 0.00E+00 | 0.00E+00 | 0.00E+00 | 0.00E+00 | 0.00E+00 | 0.00E+00 | 9.46E+05 | 0.00E+00 | 0.00E+00 | 0.00E+00 | 0.00E+00 | 0.00E+00 | 0.00E+00 | 0.00E+00 | 0.00E+00 | 0.00E+00 | 5.91E+04 | 1.18E+05 | 0.00E+00 | 2.36E+05 | 3.34E+05 | 0.00E+00 | 3.34E-01 |          |
| E5RK64;O95292-2;O95292                                                                              | 0.00E+00 | 0.00E+00 | 0.00E+00 | 0.00E+00 | 0.00E+00 | 0.00E+00 | 0.00E+00 | 0.00E+00 | 0.00E+00 | 0.00E+00 | 0.00E+00 | 0.00E+00 | 0.00E+00 | 0.00E+00 | 0.00E+00 | 0.00E+00 | 0.00E+00 | 3.24E+04 | 0.00E+00 | 6.48E+04 | 1.30E+05 | 0.00E+00 | 1.83E+05 | 3.34E-01 |          |
| E7EM64;Q7L5N1                                                                                       | 0.00E+00 | 0.00E+00 | 0.00E+00 | 0.00E+00 | 0.00E+00 | 0.00E+00 | 0.00E+00 | 0.00E+00 | 0.00E+00 | 0.00E+00 | 7.58E+05 | 0.00E+00 | 0.00E+00 | 0.00E+00 | 0.00E+00 | 0.00E+00 | 0.00E+00 | 4.74E+04 | 0.00E+00 | 9.48E+04 | 1.90E+05 | 0.00E+00 | 2.68E+05 | 3.34E-01 |          |
| H0YBB4;H0YAV7;E7EMW7;O95071-2;O95071                                                                | 0.00E+00 | 0.00E+00 | 2.76E+06 | 0.00E+00 | 0.00E+00 | 0.00E+00 | 0.00E+00 | 0.00E+00 | 0.00E+00 | 0.00E+00 | 0.00E+00 | 0.00E+00 | 0.00E+00 | 0.00E+00 | 0.00E+00 | 0.00E+00 | 0.00E+00 | 1.72E+05 | 3.44E+05 | 0.00E+00 | 6.89E+05 | 9.74E+05 | 0.00E+00 | 3.34E-01 |          |
| K7EJL1;E7ENJ6;Q9BXS5;Q9BXS5-2;K7EPJ8;A0A087WZX7                                                     | 0.00E+00 | 0.00E+00 | 0.00E+00 | 0.00E+00 | 0.00E+00 | 0.00E+00 | 0.00E+00 | 0.00E+00 | 0.00E+00 | 0.00E+00 | 0.00E+00 | 0.00E+00 | 0.00E+00 | 0.00E+00 | 0.00E+00 | 0.00E+00 | 0.00E+00 | 1.85E+05 | 0.00E+00 | 3.71E+05 | 7.41E+05 | 0.00E+00 | 1.05E+06 | 3.34E-01 |          |
| E7ENN3;Q8NF91-4;Q8NF91;A0A087WYJ5;F5GYQ7;F5GXQ8;Q8NF91-5;Q8NF91-6;Q8NF91-8;Q8NF91-2;Q8NF91-7        | 0.00E+00 | 0.00E+00 | 0.00E+00 | 0.00E+00 | 0.00E+00 | 0.00E+00 | 0.00E+00 | 0.00E+00 | 0.00E+00 | 0.00E+00 | 0.00E+00 | 0.00E+00 | 0.00E+00 | 0.00E+00 | 0.00E+00 | 0.00E+00 | 0.00E+00 | 5.54E+04 | 0.00E+00 | 1.11E+05 | 2.21E+05 | 0.00E+00 | 3.13E+05 | 3.34E-01 |          |
| G3V1Q4;E7ES33;Q16181-2;Q16181;E7EPK1;H0Y3Y4                                                         | 0.00E+00 | 0.00E+00 | 0.00E+00 | 0.00E+00 | 7.03E+04 | 0.00E+00 | 0.00E+00 | 0.00E+00 | 0.00E+00 | 0.00E+00 | 0.00E+00 | 0.00E+00 | 0.00E+00 | 0.00E+00 | 0.00E+00 | 0.00E+00 | 0.00E+00 | 4.39E+03 | 8.78E+03 | 0.00E+00 | 1.76E+04 | 2.48E+04 | 0.00E+00 | 3.34E-01 |          |
| P19404;E7EPT4                                                                                       | 0.00E+00 | 0.00E+00 | 0.00E+00 | 0.00E+00 | 0.00E+00 | 0.00E+00 | 3.80E+06 | 0.00E+00 | 0.00E+00 | 0.00E+00 | 0.00E+00 | 0.00E+00 | 0.00E+00 | 0.00E+00 | 0.00E+00 | 0.00E+00 | 0.00E+00 | 2.38E+05 | 4.75E+05 | 0.00E+00 | 9.51E+05 | 1.34E+06 | 0.00E+00 | 3.34E-01 |          |
| E7EWE1;E7EQ61;Q9GZZ9                                                                                | 9.75E+06 | 0.00E+00 | 0.00E+00 | 0.00E+00 | 0.00E+00 | 0.00E+00 | 0.00E+00 | 0.00E+00 | 0.00E+00 | 0.00E+00 | 0.00E+00 | 0.00E+00 | 0.00E+00 | 0.00E+00 | 0.00E+00 | 0.00E+00 | 0.00E+00 | 6.10E+05 | 1.22E+06 | 0.00E+00 | 2.44E+06 | 3.45E+06 | 0.00E+00 | 3.34E-01 |          |
| E7EQ72;Q15363;F5GX39                                                                                | 0.00E+00 | 0.00E+00 | 0.00E+00 | 0.00E+00 | 0.00E+00 | 4.46E+06 | 0.00E+00 | 0.00E+00 | 0.00E+00 | 0.00E+00 | 0.00E+00 | 0.00E+00 | 0.00E+00 | 0.00E+00 | 0.00E+00 | 0.00E+00 | 0.00E+00 | 2.79E+05 | 5.58E+05 | 0.00E+00 | 1.12E+06 | 1.58E+06 | 0.00E+00 | 3.34E-01 |          |
| P02788-2;E7EQB2;E7ER44;P02788                                                                       | 0.00E+00 | 0.00E+00 | 0.00E+00 | 0.00E+00 | 0.00E+00 | 0.00E+00 | 0.00E+00 | 3.07E+06 | 0.00E+00 | 0.00E+00 | 0.00E+00 | 0.00E+00 | 0.00E+00 | 0.00E+00 | 0.00E+00 | 0.00E+00 | 0.00E+00 | 1.92E+05 | 3.84E+05 | 0.00E+00 | 7.68E+05 | 1.09E+06 | 0.00E+00 | 3.34E-01 |          |
| E7EQG2;Q14240;Q14240-2                                                                              | 0.00E+00 | 3.93E+06 | 0.00E+00 | 0.00E+00 | 0.00E+00 | 0.00E+00 | 0.00E+00 | 0.00E+00 | 0.00E+00 | 0.00E+00 | 0.00E+00 | 0.00E+00 | 0.00E+00 | 0.00E+00 | 0.00E+00 | 0.00E+00 | 0.00E+00 | 2.46E+05 | 4.92E+05 | 0.00E+00 | 9.83E+05 | 1.39E+06 | 0.00E+00 | 3.34E-01 |          |
| E9PES6;E7ES08;E7EQU1;O15347                                                                         | 0.00E+00 | 0.00E+00 | 0.00E+00 | 0.00E+00 | 0.00E+00 | 0.00E+00 | 0.00E+00 | 0.00E+00 | 0.00E+00 | 0.00E+00 | 0.00E+00 | 0.00E+00 | 0.00E+00 | 0.00E+00 | 0.00E+00 | 5.00E+06 | 0.00E+00 | 0.00E+00 | 3.13E+05 | 0.00E+00 | 6.25E+05 | 1.25E+06 | 0.00E+00 | 1.77E+06 | 3.34E-01 |
| E7ERW8;H9KV28;O60610-2;E9PHQ0;O60610-3;E9PEZ3;O60610;E7EMV0                                         | 0.00E+00 | 0.00E+00 | 0.00E+00 | 0.00E+00 | 0.00E+00 | 0.00E+00 | 0.00E+00 | 7.02E+05 | 0.00E+00 | 0.00E+00 | 0.00E+00 | 0.00E+00 | 0.00E+00 | 0.00E+00 | 0.00E+00 | 0.00E+00 | 0.00E+00 | 4.39E+04 | 8.78E+04 | 0.00E+00 | 1.76E+05 | 2.48E+05 | 0.00E+00 | 3.34E-01 |          |
| Q13428-2;Q13428-8;J3KQ96;Q13428-6;Q13428-7;Q13428;E7ETY2;Q13428-3;Q13428-4                          | 0.00E+00 | 0.00E+00 | 0.00E+00 | 0.00E+00 | 0.00E+00 | 0.00E+00 | 0.00E+00 | 0.00E+00 | 0.00E+00 | 0.00E+00 | 0.00E+00 | 0.00E+00 | 0.00E+00 | 0.00E+00 | 0.00E+00 | 0.00E+00 | 0.00E+00 | 9.22E+03 | 0.00E+00 | 1.84E+04 | 3.69E+04 | 0.00E+00 | 5.21E+04 | 3.34E-01 |          |
| Q75MG1;E7ETZ4;Q9Y6E2;E9PFE3;C9JF98;F8WDX8;E9PF04;Q9Y6E2-2;E7EMS9;B5MCE7;B5MCH7                      | 0.00E+00 | 0.00E+00 | 0.00E+00 | 0.00E+00 | 2.94E+05 | 0.00E+00 | 0.00E+00 | 0.00E+00 | 0.00E+00 | 0.00E+00 | 0.00E+00 | 0.00E+00 | 0.00E+00 | 0.00E+00 | 0.00E+00 | 0.00E+00 | 0.00E+00 | 1.84E+04 | 3.67E+04 | 0.00E+00 | 7.34E+04 | 1.04E+05 | 0.00E+00 | 3.34E-01 |          |
| E7EV59;P21283                                                                                       | 0.00E+00 | 0.00E+00 | 0.00E+00 | 0.00E+00 | 0.00E+00 | 0.00E+00 | 0.00E+00 | 0.00E+00 | 0.00E+00 | 0.00E+00 | 0.00E+00 | 0.00E+00 | 0.00E+00 | 0.00E+00 | 0.00E+00 | 0.00E+00 | 0.00E+00 | 3.88E+04 | 0.00E+00 | 7.76E+04 | 1.55E+05 | 0.00E+00 | 2.19E+05 | 3.34E-01 |          |
| E7EVJ5;Q96F07-2;Q96F07;A0A087WVE1;A0A087WTO3;A0A087WWZ1                                             | 0.00E+00 | 0.00E+00 | 0.00E+00 | 0.00E+00 | 2.32E+06 | 0.00E+00 | 0.00E+00 | 0.00E+00 | 0.00E+00 | 0.00E+00 | 0.00E+00 | 0.00E+00 | 0.00E+00 | 0.00E+00 | 0.00E+00 | 0.00E+00 | 0.00E+00 | 1.45E+05 | 2.90E+05 | 0.00E+00 | 5.80E+05 | 8.20E+05 | 0.00E+00 | 3.34E-01 |          |
| E9PH64;E7EWZ0;Q9Y6M9;E9PF49                                                                         | 0.00E+00 | 0.00E+00 | 0.00E+00 | 0.00E+00 | 0.00E+00 | 0.00E+00 | 0.00E+00 | 0.00E+00 | 0.00E+00 | 0.00E+00 | 0.00E+00 | 0.00E+00 | 6.78E+06 | 0.00E+00 | 0.00E+00 | 0.00E+00 | 0.00E+00 | 4.24E+05 | 0.00E+00 | 8.48E+05 | 1.70E+06 | 0.00E+00 | 2.40E+06 | 3.34E-01 |          |

|                                                                                                                        |          |          |          |          |          |          |          |          |          |          |          |          |          |          |          |          |          |          |          |          |          |          |          |          |          |          |          |
|------------------------------------------------------------------------------------------------------------------------|----------|----------|----------|----------|----------|----------|----------|----------|----------|----------|----------|----------|----------|----------|----------|----------|----------|----------|----------|----------|----------|----------|----------|----------|----------|----------|----------|
| Q14203-5;Q14203-2;Q14203-3;Q14203-4;E7EX90;Q14203-6;Q14203;Q6AWB1                                                      | 0.00E+00 | 0.00E+00 | 0.00E+00 | 0.00E+00 | 0.00E+00 | 0.00E+00 | 0.00E+00 | 0.00E+00 | 0.00E+00 | 0.00E+00 | 0.00E+00 | 0.00E+00 | 0.00E+00 | 0.00E+00 | 0.00E+00 | 0.00E+00 | 0.00E+00 | 2.20E+06 | 0.00E+00 | 1.38E+05 | 0.00E+00 | 2.76E+05 | 5.51E+05 | 0.00E+00 | 7.79E+05 | 3.34E-01 |          |
| Q86V81;E9PB61                                                                                                          | 0.00E+00 | 0.00E+00 | 0.00E+00 | 0.00E+00 | 0.00E+00 | 0.00E+00 | 0.00E+00 | 0.00E+00 | 0.00E+00 | 0.00E+00 | 2.19E+06 | 0.00E+00 | 0.00E+00 | 0.00E+00 | 0.00E+00 | 0.00E+00 | 0.00E+00 | 0.00E+00 | 1.37E+05 | 0.00E+00 | 2.74E+05 | 5.47E+05 | 0.00E+00 | 7.74E+05 | 3.34E-01 |          |          |
| E9PB90;P52789                                                                                                          | 0.00E+00 | 0.00E+00 | 0.00E+00 | 0.00E+00 | 0.00E+00 | 0.00E+00 | 0.00E+00 | 0.00E+00 | 0.00E+00 | 2.95E+06 | 0.00E+00 | 0.00E+00 | 0.00E+00 | 0.00E+00 | 0.00E+00 | 0.00E+00 | 0.00E+00 | 0.00E+00 | 1.84E+05 | 0.00E+00 | 3.68E+05 | 7.37E+05 | 0.00E+00 | 1.04E+06 | 3.34E-01 |          |          |
| E9PG39;E9PC15;Q53H12                                                                                                   | 0.00E+00 | 0.00E+00 | 0.00E+00 | 0.00E+00 | 0.00E+00 | 0.00E+00 | 0.00E+00 | 0.00E+00 | 0.00E+00 | 0.00E+00 | 0.00E+00 | 0.00E+00 | 0.00E+00 | 0.00E+00 | 0.00E+00 | 0.00E+00 | 0.00E+00 | 1.91E+05 | 1.19E+04 | 0.00E+00 | 2.38E+04 | 4.76E+04 | 0.00E+00 | 6.74E+04 | 3.34E-01 |          |          |
| E9PCB6;Q9BYT8;H0YAF7;H0YAK4                                                                                            | 0.00E+00 | 0.00E+00 | 0.00E+00 | 0.00E+00 | 0.00E+00 | 0.00E+00 | 0.00E+00 | 0.00E+00 | 0.00E+00 | 0.00E+00 | 7.51E+06 | 0.00E+00 | 0.00E+00 | 0.00E+00 | 0.00E+00 | 0.00E+00 | 0.00E+00 | 0.00E+00 | 4.69E+05 | 0.00E+00 | 9.39E+05 | 1.88E+06 | 0.00E+00 | 2.66E+06 | 3.34E-01 |          |          |
| H7C1Z2;E9PCP1;F8WD49;P48751-2;J3KNG9;P04920-2;P48751;P04920-3;P04920;P48751-3                                          | 0.00E+00 | 0.00E+00 | 0.00E+00 | 0.00E+00 | 7.69E+06 | 0.00E+00 | 0.00E+00 | 0.00E+00 | 0.00E+00 | 0.00E+00 | 0.00E+00 | 0.00E+00 | 0.00E+00 | 0.00E+00 | 0.00E+00 | 0.00E+00 | 0.00E+00 | 0.00E+00 | 4.80E+05 | 9.61E+05 | 0.00E+00 | 1.92E+06 | 2.72E+06 | 0.00E+00 | 3.34E-01 |          |          |
| E9PCY7;P31943;G8JLB6;E5RGV0;D6RIU0;D6RBM0;E5RGH4;E7EQJ0;D6RAM1;D6R9T0;D6RFM3;D6RIT2;E7EN40;D6RDU3;D6RJ04;D6RIH9;H0YB39 | 0.00E+00 | 0.00E+00 | 0.00E+00 | 0.00E+00 | 0.00E+00 | 0.00E+00 | 0.00E+00 | 0.00E+00 | 0.00E+00 | 0.00E+00 | 0.00E+00 | 0.00E+00 | 0.00E+00 | 0.00E+00 | 0.00E+00 | 0.00E+00 | 0.00E+00 | 0.00E+00 | 3.80E+05 | 0.00E+00 | 7.60E+05 | 1.52E+06 | 0.00E+00 | 2.15E+06 | 3.34E-01 |          |          |
| Q9NTJ3-2;E9PD53;Q9NTJ3                                                                                                 | 0.00E+00 | 0.00E+00 | 0.00E+00 | 0.00E+00 | 0.00E+00 | 0.00E+00 | 0.00E+00 | 0.00E+00 | 0.00E+00 | 0.00E+00 | 0.00E+00 | 0.00E+00 | 0.00E+00 | 0.00E+00 | 0.00E+00 | 0.00E+00 | 0.00E+00 | 0.00E+00 | 2.75E+05 | 0.00E+00 | 5.51E+05 | 1.10E+06 | 0.00E+00 | 1.56E+06 | 3.34E-01 |          |          |
| Q96AE4;Q96AE4-2;E9PEB5                                                                                                 | 0.00E+00 | 0.00E+00 | 0.00E+00 | 0.00E+00 | 0.00E+00 | 0.00E+00 | 0.00E+00 | 0.00E+00 | 2.20E+06 | 0.00E+00 | 0.00E+00 | 0.00E+00 | 0.00E+00 | 0.00E+00 | 0.00E+00 | 0.00E+00 | 0.00E+00 | 0.00E+00 | 1.38E+05 | 2.75E+05 | 0.00E+00 | 5.51E+05 | 7.79E+05 | 0.00E+00 | 3.34E-01 |          |          |
| H0YDD4;E9PEJ4;P10515                                                                                                   | 0.00E+00 | 0.00E+00 | 0.00E+00 | 0.00E+00 | 0.00E+00 | 0.00E+00 | 0.00E+00 | 0.00E+00 | 0.00E+00 | 1.16E+06 | 0.00E+00 | 0.00E+00 | 0.00E+00 | 0.00E+00 | 0.00E+00 | 0.00E+00 | 0.00E+00 | 0.00E+00 | 7.23E+04 | 0.00E+00 | 1.45E+05 | 2.89E+05 | 0.00E+00 | 4.09E+05 | 3.34E-01 |          |          |
| Q96CM8-4;E9PF16;Q96CM8-3;Q96CM8;Q96CM8-2                                                                               | 0.00E+00 | 0.00E+00 | 0.00E+00 | 0.00E+00 | 0.00E+00 | 0.00E+00 | 0.00E+00 | 0.00E+00 | 2.74E+06 | 0.00E+00 | 0.00E+00 | 0.00E+00 | 0.00E+00 | 0.00E+00 | 0.00E+00 | 0.00E+00 | 0.00E+00 | 0.00E+00 | 1.72E+05 | 0.00E+00 | 3.43E+05 | 6.86E+05 | 0.00E+00 | 9.70E+05 | 3.34E-01 |          |          |
| E9PF19;Q9Y4P3                                                                                                          | 0.00E+00 | 0.00E+00 | 0.00E+00 | 0.00E+00 | 0.00E+00 | 0.00E+00 | 0.00E+00 | 0.00E+00 | 0.00E+00 | 0.00E+00 | 0.00E+00 | 0.00E+00 | 0.00E+00 | 2.25E+06 | 0.00E+00 | 0.00E+00 | 0.00E+00 | 0.00E+00 | 1.40E+05 | 0.00E+00 | 2.81E+05 | 5.62E+05 | 0.00E+00 | 7.95E+05 | 3.34E-01 |          |          |
| Q504U8;E9PFD7;P00533;C9YJ56;P00533-2;P00533-4;P00533-3                                                                 | 0.00E+00 | 0.00E+00 | 0.00E+00 | 0.00E+00 | 0.00E+00 | 0.00E+00 | 0.00E+00 | 0.00E+00 | 0.00E+00 | 0.00E+00 | 0.00E+00 | 0.00E+00 | 0.00E+00 | 0.00E+00 | 0.00E+00 | 0.00E+00 | 0.00E+00 | 0.00E+00 | 1.29E+05 | 0.00E+00 | 2.59E+05 | 5.18E+05 | 0.00E+00 | 7.32E+05 | 3.34E-01 |          |          |
| Q9Y2Q3-4;E9PFN5;Q9Y2Q3;C9JNT3;Q9Y2Q3-3;Q9Y2Q3-2                                                                        | 0.00E+00 | 0.00E+00 | 0.00E+00 | 0.00E+00 | 0.00E+00 | 0.00E+00 | 0.00E+00 | 0.00E+00 | 0.00E+00 | 0.00E+00 | 0.00E+00 | 0.00E+00 | 0.00E+00 | 0.00E+00 | 0.00E+00 | 0.00E+00 | 0.00E+00 | 0.00E+00 | 2.39E+06 | 0.00E+00 | 1.50E+05 | 0.00E+00 | 2.99E+05 | 5.98E+05 | 0.00E+00 | 8.46E+05 | 3.34E-01 |
| F5GYT8;E9PG35;E9PHF7;Q96RQ3                                                                                            | 0.00E+00 | 0.00E+00 | 0.00E+00 | 0.00E+00 | 0.00E+00 | 0.00E+00 | 0.00E+00 | 0.00E+00 | 0.00E+00 | 0.00E+00 | 0.00E+00 | 0.00E+00 | 0.00E+00 | 0.00E+00 | 3.25E+06 | 0.00E+00 | 0.00E+00 | 0.00E+00 | 2.03E+05 | 0.00E+00 | 4.07E+05 | 8.14E+05 | 0.00E+00 | 1.15E+06 | 3.34E-01 |          |          |
| P78559;P78559-2;E9PGC8;P46821                                                                                          | 0.00E+00 | 0.00E+00 | 0.00E+00 | 0.00E+00 | 0.00E+00 | 0.00E+00 | 0.00E+00 | 0.00E+00 | 0.00E+00 | 0.00E+00 | 1.46E+06 | 0.00E+00 | 0.00E+00 | 0.00E+00 | 0.00E+00 | 0.00E+00 | 0.00E+00 | 0.00E+00 | 9.12E+04 | 0.00E+00 | 1.82E+05 | 3.65E+05 | 0.00E+00 | 5.16E+05 | 3.34E-01 |          |          |
| I6L9B1;O43491-2;E9PII3;O43491-3;E9PK52;O43491-4;E9PHY5;O43491                                                          | 0.00E+00 | 0.00E+00 | 0.00E+00 | 0.00E+00 | 0.00E+00 | 0.00E+00 | 0.00E+00 | 0.00E+00 | 0.00E+00 | 0.00E+00 | 0.00E+00 | 0.00E+00 | 0.00E+00 | 2.13E+06 | 0.00E+00 | 0.00E+00 | 0.00E+00 | 0.00E+00 | 1.33E+05 | 0.00E+00 | 2.66E+05 | 5.33E+05 | 0.00E+00 | 7.53E+05 | 3.34E-01 |          |          |
| E9PI70;E9PIPO;E9PRL3;E9PPH0;E9PPA0;Q9BWS9-3;Q9BWS9;Q9BWS9-2                                                            | 0.00E+00 | 0.00E+00 | 0.00E+00 | 0.00E+00 | 0.00E+00 | 0.00E+00 | 3.49E+06 | 0.00E+00 | 0.00E+00 | 0.00E+00 | 0.00E+00 | 0.00E+00 | 0.00E+00 | 0.00E+00 | 0.00E+00 | 0.00E+00 | 0.00E+00 | 0.00E+00 | 2.18E+05 | 4.37E+05 | 0.00E+00 | 8.74E+05 | 1.24E+06 | 0.00E+00 | 3.34E-01 |          |          |
| K4DIA8;K4DIA2;K4DIB0;K4DIB2;E9PQ36;K4DIB8;E9PI74;K4DIB3;E9PS95;E9PH7;Q9H1K4;Q9H936                                     | 0.00E+00 | 0.00E+00 | 0.00E+00 | 0.00E+00 | 0.00E+00 | 0.00E+00 | 0.00E+00 | 0.00E+00 | 0.00E+00 | 0.00E+00 | 0.00E+00 | 0.00E+00 | 0.00E+00 | 0.00E+00 | 3.35E+04 | 0.00E+00 | 0.00E+00 | 0.00E+00 | 2.10E+03 | 0.00E+00 | 4.19E+03 | 8.38E+03 | 0.00E+00 | 1.19E+04 | 3.34E-01 |          |          |



|                                                                                                |          |          |          |          |          |          |          |          |          |          |          |          |          |          |          |          |          |          |          |          |          |          |          |          |          |          |          |          |
|------------------------------------------------------------------------------------------------|----------|----------|----------|----------|----------|----------|----------|----------|----------|----------|----------|----------|----------|----------|----------|----------|----------|----------|----------|----------|----------|----------|----------|----------|----------|----------|----------|----------|
| E9PIZ4;E9PSD5;E9PPQ5;<br>Q9UHD1;Q9UHD1-2                                                       | 0.00E+00 | 0.00E+00 | 0.00E+00 | 0.00E+00 | 0.00E+00 | 0.00E+00 | 0.00E+00 | 0.00E+00 | 0.00E+00 | 0.00E+00 | 0.00E+00 | 0.00E+00 | 0.00E+00 | 0.00E+00 | 0.00E+00 | 0.00E+00 | 0.00E+00 | 0.00E+00 | 5.28E+04 | 3.30E+03 | 0.00E+00 | 6.60E+03 | 1.32E+04 | 0.00E+00 | 1.87E+04 | 3.34E-01 |          |          |
| E9PK09;E9PQN2;E9PKI6;<br>Q9NYF8-<br>3;E9PK91;Q9NYF8-<br>2;Q9NYF8                               | 0.00E+00 | 0.00E+00 | 0.00E+00 | 0.00E+00 | 0.00E+00 | 0.00E+00 | 0.00E+00 | 0.00E+00 | 0.00E+00 | 0.00E+00 | 0.00E+00 | 0.00E+00 | 0.00E+00 | 0.00E+00 | 9.42E+05 | 0.00E+00 | 0.00E+00 | 0.00E+00 | 0.00E+00 | 5.89E+04 | 0.00E+00 | 1.18E+05 | 2.35E+05 | 0.00E+00 | 3.33E+05 | 3.34E-01 |          |          |
| E9PP36;E9PKZ0;E9PKU4;<br>P6Z917                                                                | 0.00E+00 | 0.00E+00 | 0.00E+00 | 0.00E+00 | 0.00E+00 | 0.00E+00 | 2.43E+06 | 0.00E+00 | 0.00E+00 | 0.00E+00 | 0.00E+00 | 0.00E+00 | 0.00E+00 | 0.00E+00 | 0.00E+00 | 0.00E+00 | 0.00E+00 | 0.00E+00 | 0.00E+00 | 1.52E+05 | 3.04E+05 | 0.00E+00 | 6.08E+05 | 8.60E+05 | 0.00E+00 | 3.34E-01 |          |          |
| E9PLA9;Q14444-<br>2;Q14444;E9PP31;G3V15<br>3;A0A087X082                                        | 0.00E+00 | 0.00E+00 | 0.00E+00 | 0.00E+00 | 0.00E+00 | 9.07E+05 | 0.00E+00 | 0.00E+00 | 0.00E+00 | 0.00E+00 | 0.00E+00 | 0.00E+00 | 0.00E+00 | 0.00E+00 | 0.00E+00 | 0.00E+00 | 0.00E+00 | 0.00E+00 | 0.00E+00 | 5.67E+04 | 1.13E+05 | 0.00E+00 | 2.27E+05 | 3.21E+05 | 0.00E+00 | 3.34E-01 |          |          |
| E9PLT0;O75534-<br>2;O75534;O75534-<br>3;O75534-4                                               | 0.00E+00 | 0.00E+00 | 0.00E+00 | 0.00E+00 | 6.88E+05 | 0.00E+00 | 0.00E+00 | 0.00E+00 | 0.00E+00 | 0.00E+00 | 0.00E+00 | 0.00E+00 | 0.00E+00 | 0.00E+00 | 0.00E+00 | 0.00E+00 | 0.00E+00 | 0.00E+00 | 0.00E+00 | 4.30E+04 | 8.60E+04 | 0.00E+00 | 1.72E+05 | 2.43E+05 | 0.00E+00 | 3.34E-01 |          |          |
| E9POP1;E9PMX3;P49821<br>-<br>2;G3V0I5;P49821;E9PPS5;<br>;E9PL9;HOYE81;E9PLC6;<br>E9PPR0;B4DE93 | 0.00E+00 | 0.00E+00 | 0.00E+00 | 0.00E+00 | 0.00E+00 | 0.00E+00 | 0.00E+00 | 0.00E+00 | 0.00E+00 | 0.00E+00 | 0.00E+00 | 0.00E+00 | 0.00E+00 | 0.00E+00 | 6.03E+05 | 0.00E+00 | 0.00E+00 | 0.00E+00 | 0.00E+00 | 0.00E+00 | 3.77E+04 | 0.00E+00 | 7.54E+04 | 1.51E+05 | 0.00E+00 | 2.13E+05 | 3.34E-01 |          |
| F2Z2E2;Q86VI3                                                                                  | 0.00E+00 | 0.00E+00 | 0.00E+00 | 0.00E+00 | 0.00E+00 | 0.00E+00 | 0.00E+00 | 0.00E+00 | 0.00E+00 | 0.00E+00 | 0.00E+00 | 0.00E+00 | 0.00E+00 | 0.00E+00 | 0.00E+00 | 0.00E+00 | 0.00E+00 | 0.00E+00 | 0.00E+00 | 2.57E+05 | 1.61E+04 | 0.00E+00 | 3.22E+04 | 6.43E+04 | 0.00E+00 | 9.10E+04 | 3.34E-01 |          |
| F2Z2K0;Q9UNZ2;Q9UNZ2<br>-5;R4GNE6;Q9UNZ2-<br>6;Q9UNZ2-4                                        | 0.00E+00 | 0.00E+00 | 0.00E+00 | 0.00E+00 | 0.00E+00 | 0.00E+00 | 0.00E+00 | 0.00E+00 | 0.00E+00 | 0.00E+00 | 1.57E+06 | 0.00E+00 | 0.00E+00 | 0.00E+00 | 0.00E+00 | 0.00E+00 | 0.00E+00 | 0.00E+00 | 0.00E+00 | 0.00E+00 | 9.84E+04 | 0.00E+00 | 1.97E+05 | 3.94E+05 | 0.00E+00 | 5.57E+05 | 3.34E-01 |          |
| O00764-<br>3;F2Z2Y4;O00764;<br>O00764-2                                                        | 0.00E+00 | 0.00E+00 | 0.00E+00 | 0.00E+00 | 0.00E+00 | 0.00E+00 | 2.46E+05 | 0.00E+00 | 0.00E+00 | 0.00E+00 | 0.00E+00 | 0.00E+00 | 0.00E+00 | 0.00E+00 | 0.00E+00 | 0.00E+00 | 0.00E+00 | 0.00E+00 | 0.00E+00 | 1.54E+04 | 3.07E+04 | 0.00E+00 | 6.15E+04 | 8.69E+04 | 0.00E+00 | 3.34E-01 |          |          |
| F2Z3J2;Q16401-2;Q16401                                                                         | 0.00E+00 | 0.00E+00 | 0.00E+00 | 0.00E+00 | 0.00E+00 | 0.00E+00 | 0.00E+00 | 0.00E+00 | 0.00E+00 | 0.00E+00 | 0.00E+00 | 0.00E+00 | 0.00E+00 | 0.00E+00 | 0.00E+00 | 0.00E+00 | 0.00E+00 | 0.00E+00 | 0.00E+00 | 1.96E+05 | 1.22E+04 | 0.00E+00 | 2.45E+04 | 4.89E+04 | 0.00E+00 | 6.92E+04 | 3.34E-01 |          |
| F5GWX2;Q9NRV9;HOYG7<br>1                                                                       | 0.00E+00 | 0.00E+00 | 0.00E+00 | 0.00E+00 | 0.00E+00 | 0.00E+00 | 0.00E+00 | 0.00E+00 | 0.00E+00 | 0.00E+00 | 0.00E+00 | 0.00E+00 | 0.00E+00 | 0.00E+00 | 0.00E+00 | 0.00E+00 | 0.00E+00 | 0.00E+00 | 0.00E+00 | 3.01E+06 | 0.00E+00 | 1.88E+05 | 0.00E+00 | 3.76E+05 | 7.53E+05 | 0.00E+00 | 1.06E+06 | 3.34E-01 |
| F5GYN4;Q96FW1;J3KR44<br>;F5H6Q1;F5GYJ8;F5H3F0<br>;Q96FW1-2                                     | 0.00E+00 | 0.00E+00 | 0.00E+00 | 0.00E+00 | 0.00E+00 | 1.89E+06 | 0.00E+00 | 0.00E+00 | 0.00E+00 | 0.00E+00 | 0.00E+00 | 0.00E+00 | 0.00E+00 | 0.00E+00 | 0.00E+00 | 0.00E+00 | 0.00E+00 | 0.00E+00 | 0.00E+00 | 0.00E+00 | 1.18E+05 | 2.37E+05 | 0.00E+00 | 4.74E+05 | 6.70E+05 | 0.00E+00 | 3.34E-01 |          |
| J3QL14;R4GN72;P61421;<br>F5GYQ1                                                                | 0.00E+00 | 0.00E+00 | 0.00E+00 | 2.22E+06 | 0.00E+00 | 0.00E+00 | 0.00E+00 | 0.00E+00 | 0.00E+00 | 0.00E+00 | 0.00E+00 | 0.00E+00 | 0.00E+00 | 0.00E+00 | 0.00E+00 | 0.00E+00 | 0.00E+00 | 0.00E+00 | 0.00E+00 | 0.00E+00 | 1.39E+05 | 2.77E+05 | 0.00E+00 | 5.55E+05 | 7.84E+05 | 0.00E+00 | 3.34E-01 |          |
| G3V5X8;G3V4Q2;G3V4V1<br>;G3V1W4;G3V3G5;G3V2R<br>6;F5H365;Q15436                                | 0.00E+00 | 0.00E+00 | 0.00E+00 | 0.00E+00 | 0.00E+00 | 0.00E+00 | 0.00E+00 | 0.00E+00 | 0.00E+00 | 0.00E+00 | 0.00E+00 | 0.00E+00 | 0.00E+00 | 0.00E+00 | 0.00E+00 | 0.00E+00 | 0.00E+00 | 0.00E+00 | 0.00E+00 | 8.09E+05 | 5.06E+04 | 0.00E+00 | 1.01E+05 | 2.02E+05 | 0.00E+00 | 2.86E+05 | 3.34E-01 |          |
| F5H4C6;H7C3P4;P15586-<br>2;P15586;F6S8M0;HOYFA<br>9                                            | 0.00E+00 | 0.00E+00 | 0.00E+00 | 0.00E+00 | 0.00E+00 | 0.00E+00 | 0.00E+00 | 0.00E+00 | 0.00E+00 | 1.30E+06 | 0.00E+00 | 0.00E+00 | 0.00E+00 | 0.00E+00 | 0.00E+00 | 0.00E+00 | 0.00E+00 | 0.00E+00 | 0.00E+00 | 0.00E+00 | 8.11E+04 | 0.00E+00 | 1.62E+05 | 3.24E+05 | 0.00E+00 | 4.59E+05 | 3.34E-01 |          |
| Q12849-<br>5;HOY8R1;F5H5I6;HOYAK<br>1;Q12849                                                   | 0.00E+00 | 0.00E+00 | 0.00E+00 | 0.00E+00 | 0.00E+00 | 0.00E+00 | 0.00E+00 | 0.00E+00 | 0.00E+00 | 0.00E+00 | 0.00E+00 | 0.00E+00 | 0.00E+00 | 0.00E+00 | 1.63E+06 | 0.00E+00 | 0.00E+00 | 0.00E+00 | 0.00E+00 | 1.02E+05 | 0.00E+00 | 2.04E+05 | 4.07E+05 | 0.00E+00 | 5.76E+05 | 3.34E-01 |          |          |
| O00159-<br>2;F5H6E2;O00159-<br>3;O00159;I3L4D4;I3L501;1<br>3L3Y6;I3L204                        | 0.00E+00 | 0.00E+00 | 0.00E+00 | 0.00E+00 | 0.00E+00 | 0.00E+00 | 0.00E+00 | 0.00E+00 | 0.00E+00 | 0.00E+00 | 0.00E+00 | 0.00E+00 | 0.00E+00 | 0.00E+00 | 0.00E+00 | 0.00E+00 | 0.00E+00 | 0.00E+00 | 0.00E+00 | 1.73E+06 | 1.08E+05 | 0.00E+00 | 2.16E+05 | 4.32E+05 | 0.00E+00 | 6.11E+05 | 3.34E-01 |          |
| G3V1U5;F5H6U7;Q9Y3E0                                                                           | 0.00E+00 | 0.00E+00 | 1.12E+06 | 0.00E+00 | 0.00E+00 | 0.00E+00 | 0.00E+00 | 0.00E+00 | 0.00E+00 | 0.00E+00 | 0.00E+00 | 0.00E+00 | 0.00E+00 | 0.00E+00 | 0.00E+00 | 0.00E+00 | 0.00E+00 | 0.00E+00 | 0.00E+00 | 0.00E+00 | 7.01E+04 | 1.40E+05 | 0.00E+00 | 2.80E+05 | 3.97E+05 | 0.00E+00 | 3.34E-01 |          |
| F6S6P2;X6REW1;P46379-<br>4;P46379-5;P46379-<br>2;P46379;P46379-3                               | 0.00E+00 | 0.00E+00 | 0.00E+00 | 0.00E+00 | 0.00E+00 | 0.00E+00 | 4.31E+06 | 0.00E+00 | 0.00E+00 | 0.00E+00 | 0.00E+00 | 0.00E+00 | 0.00E+00 | 0.00E+00 | 0.00E+00 | 0.00E+00 | 0.00E+00 | 0.00E+00 | 0.00E+00 | 0.00E+00 | 2.69E+05 | 5.38E+05 | 0.00E+00 | 1.08E+06 | 1.52E+06 | 0.00E+00 | 3.34E-01 |          |
| F8VX13;F8VNX2;F8VZQ1;<br>P08237-2;P08237;<br>P08237-3                                          | 0.00E+00 | 0.00E+00 | 0.00E+00 | 0.00E+00 | 0.00E+00 | 2.37E+06 | 0.00E+00 | 0.00E+00 | 0.00E+00 | 0.00E+00 | 0.00E+00 | 0.00E+00 | 0.00E+00 | 0.00E+00 | 0.00E+00 | 0.00E+00 | 0.00E+00 | 0.00E+00 | 0.00E+00 | 0.00E+00 | 1.48E+05 | 2.96E+05 | 0.00E+00 | 5.93E+05 | 8.38E+05 | 0.00E+00 | 3.34E-01 |          |

|                                                                                            |          |          |          |          |          |          |          |          |          |          |          |          |          |          |          |          |          |          |          |          |          |          |          |          |          |
|--------------------------------------------------------------------------------------------|----------|----------|----------|----------|----------|----------|----------|----------|----------|----------|----------|----------|----------|----------|----------|----------|----------|----------|----------|----------|----------|----------|----------|----------|----------|
| F8VPD4;P27708                                                                              | 0.00E+00 | 0.00E+00 | 0.00E+00 | 0.00E+00 | 0.00E+00 | 0.00E+00 | 0.00E+00 | 0.00E+00 | 0.00E+00 | 0.00E+00 | 3.56E+06 | 0.00E+00 | 0.00E+00 | 0.00E+00 | 0.00E+00 | 0.00E+00 | 0.00E+00 | 2.23E+05 | 0.00E+00 | 4.45E+05 | 8.91E+05 | 0.00E+00 | 1.26E+06 | 3.34E-01 |          |
| H0YHL1;F8VX93;F8VRV7;F8VW18;F8W116;Q13561;Q13561-3;Q13561-2                                | 0.00E+00 | 0.00E+00 | 0.00E+00 | 0.00E+00 | 0.00E+00 | 0.00E+00 | 0.00E+00 | 0.00E+00 | 0.00E+00 | 2.39E+06 | 0.00E+00 | 0.00E+00 | 0.00E+00 | 0.00E+00 | 0.00E+00 | 0.00E+00 | 0.00E+00 | 1.49E+05 | 0.00E+00 | 2.98E+05 | 5.96E+05 | 0.00E+00 | 8.43E+05 | 3.34E-01 |          |
| F8VV32;P61626                                                                              | 0.00E+00 | 0.00E+00 | 0.00E+00 | 0.00E+00 | 0.00E+00 | 3.51E+06 | 0.00E+00 | 0.00E+00 | 0.00E+00 | 0.00E+00 | 0.00E+00 | 0.00E+00 | 0.00E+00 | 0.00E+00 | 0.00E+00 | 0.00E+00 | 0.00E+00 | 2.19E+05 | 4.39E+05 | 0.00E+00 | 8.77E+05 | 1.24E+06 | 0.00E+00 | 3.34E-01 |          |
| P82979;F8VZQ9;H0YHGO                                                                       | 0.00E+00 | 0.00E+00 | 0.00E+00 | 0.00E+00 | 0.00E+00 | 0.00E+00 | 0.00E+00 | 0.00E+00 | 0.00E+00 | 0.00E+00 | 0.00E+00 | 0.00E+00 | 0.00E+00 | 0.00E+00 | 0.00E+00 | 0.00E+00 | 0.00E+00 | 1.03E+05 | 0.00E+00 | 2.07E+05 | 4.13E+05 | 0.00E+00 | 5.85E+05 | 3.34E-01 |          |
| F8W950;Q13155;A8MU58                                                                       | 0.00E+00 | 0.00E+00 | 0.00E+00 | 0.00E+00 | 0.00E+00 | 0.00E+00 | 0.00E+00 | 0.00E+00 | 0.00E+00 | 0.00E+00 | 0.00E+00 | 0.00E+00 | 0.00E+00 | 0.00E+00 | 0.00E+00 | 0.00E+00 | 0.00E+00 | 2.38E+04 | 0.00E+00 | 4.75E+04 | 9.50E+04 | 0.00E+00 | 1.34E+05 | 3.34E-01 |          |
| Q13277-2;F8W9Y0;Q13277-3;Q13277                                                            | 0.00E+00 | 0.00E+00 | 0.00E+00 | 0.00E+00 | 0.00E+00 | 0.00E+00 | 0.00E+00 | 0.00E+00 | 0.00E+00 | 0.00E+00 | 0.00E+00 | 0.00E+00 | 0.00E+00 | 0.00E+00 | 0.00E+00 | 0.00E+00 | 0.00E+00 | 1.35E+05 | 0.00E+00 | 2.69E+05 | 5.39E+05 | 0.00E+00 | 7.62E+05 | 3.34E-01 |          |
| Q16630-3;F8WJN3;Q16630;Q16630-2                                                            | 0.00E+00 | 0.00E+00 | 0.00E+00 | 0.00E+00 | 0.00E+00 | 1.49E+06 | 0.00E+00 | 0.00E+00 | 0.00E+00 | 0.00E+00 | 0.00E+00 | 0.00E+00 | 0.00E+00 | 0.00E+00 | 0.00E+00 | 0.00E+00 | 0.00E+00 | 9.32E+04 | 1.86E+05 | 0.00E+00 | 3.73E+05 | 5.27E+05 | 0.00E+00 | 3.34E-01 |          |
| O75439;G3V0E4                                                                              | 0.00E+00 | 0.00E+00 | 0.00E+00 | 0.00E+00 | 0.00E+00 | 0.00E+00 | 0.00E+00 | 0.00E+00 | 0.00E+00 | 3.94E+06 | 0.00E+00 | 0.00E+00 | 0.00E+00 | 0.00E+00 | 0.00E+00 | 0.00E+00 | 0.00E+00 | 2.46E+05 | 0.00E+00 | 4.92E+05 | 9.85E+05 | 0.00E+00 | 1.39E+06 | 3.34E-01 |          |
| G3V126;Q9U112-2;Q9U112                                                                     | 0.00E+00 | 0.00E+00 | 0.00E+00 | 0.00E+00 | 0.00E+00 | 0.00E+00 | 0.00E+00 | 0.00E+00 | 0.00E+00 | 8.81E+05 | 0.00E+00 | 0.00E+00 | 0.00E+00 | 0.00E+00 | 0.00E+00 | 0.00E+00 | 0.00E+00 | 5.51E+04 | 0.00E+00 | 1.10E+05 | 2.20E+05 | 0.00E+00 | 3.12E+05 | 3.34E-01 |          |
| Q9BZZ5-3;Q9BZZ5-2;G3V1C3;Q9BZZ5-6;Q9BZZ5;Q9BZZ5-1;Q9BZZ5-5                                 | 0.00E+00 | 0.00E+00 | 0.00E+00 | 0.00E+00 | 0.00E+00 | 0.00E+00 | 0.00E+00 | 0.00E+00 | 0.00E+00 | 0.00E+00 | 0.00E+00 | 0.00E+00 | 0.00E+00 | 0.00E+00 | 0.00E+00 | 0.00E+00 | 0.00E+00 | 2.71E+04 | 0.00E+00 | 5.42E+04 | 1.08E+05 | 0.00E+00 | 1.53E+05 | 3.34E-01 |          |
| G3V325;P56134-4;C9JUT5;P56134-3;P56134-2;P56134;C9JU26;O75127                              | 0.00E+00 | 0.00E+00 | 0.00E+00 | 0.00E+00 | 0.00E+00 | 0.00E+00 | 0.00E+00 | 0.00E+00 | 0.00E+00 | 0.00E+00 | 0.00E+00 | 0.00E+00 | 0.00E+00 | 0.00E+00 | 0.00E+00 | 0.00E+00 | 4.13E+05 | 0.00E+00 | 2.58E+04 | 0.00E+00 | 5.16E+04 | 1.03E+05 | 0.00E+00 | 1.46E+05 | 3.34E-01 |
| G3V3B3;Q9UBV2-2;Q9UBV2                                                                     | 0.00E+00 | 0.00E+00 | 0.00E+00 | 0.00E+00 | 0.00E+00 | 0.00E+00 | 0.00E+00 | 0.00E+00 | 0.00E+00 | 0.00E+00 | 0.00E+00 | 0.00E+00 | 0.00E+00 | 0.00E+00 | 0.00E+00 | 0.00E+00 | 0.00E+00 | 2.43E+06 | 1.52E+05 | 0.00E+00 | 3.03E+05 | 6.07E+05 | 0.00E+00 | 8.58E+05 | 3.34E-01 |
| G3V529;Q9GZR7                                                                              | 0.00E+00 | 1.20E+06 | 0.00E+00 | 0.00E+00 | 0.00E+00 | 0.00E+00 | 0.00E+00 | 0.00E+00 | 0.00E+00 | 0.00E+00 | 0.00E+00 | 0.00E+00 | 0.00E+00 | 0.00E+00 | 0.00E+00 | 0.00E+00 | 0.00E+00 | 7.51E+04 | 1.50E+05 | 0.00E+00 | 3.01E+05 | 4.25E+05 | 0.00E+00 | 3.34E-01 |          |
| MOQX14;Q5HY98;G3XAE0                                                                       | 0.00E+00 | 0.00E+00 | 0.00E+00 | 2.88E+06 | 0.00E+00 | 0.00E+00 | 0.00E+00 | 0.00E+00 | 0.00E+00 | 0.00E+00 | 0.00E+00 | 0.00E+00 | 0.00E+00 | 0.00E+00 | 0.00E+00 | 0.00E+00 | 0.00E+00 | 1.80E+05 | 3.60E+05 | 0.00E+00 | 7.20E+05 | 1.02E+06 | 0.00E+00 | 3.34E-01 |          |
| P35221-3;G3XAM7;P35221;P35221-2                                                            | 0.00E+00 | 0.00E+00 | 0.00E+00 | 0.00E+00 | 0.00E+00 | 0.00E+00 | 0.00E+00 | 0.00E+00 | 0.00E+00 | 0.00E+00 | 0.00E+00 | 0.00E+00 | 0.00E+00 | 0.00E+00 | 0.00E+00 | 0.00E+00 | 0.00E+00 | 5.41E+06 | 3.38E+05 | 0.00E+00 | 6.76E+05 | 1.35E+06 | 0.00E+00 | 1.91E+06 | 3.34E-01 |
| Q9BQ52-2;Q9BQ52-4;G5E9D5;Q9BQ52;J3QR S2;V9GYU5;J3QL08;J3QL K4;V9GZ72;V9GYS7;H7C 2I4;E7ES68 | 0.00E+00 | 0.00E+00 | 1.75E+06 | 0.00E+00 | 0.00E+00 | 0.00E+00 | 0.00E+00 | 0.00E+00 | 0.00E+00 | 0.00E+00 | 0.00E+00 | 0.00E+00 | 0.00E+00 | 0.00E+00 | 0.00E+00 | 0.00E+00 | 0.00E+00 | 1.09E+05 | 2.19E+05 | 0.00E+00 | 4.38E+05 | 6.19E+05 | 0.00E+00 | 3.34E-01 |          |
| G5E9W7;G5E9V5;P82650;H7C5L9                                                                | 0.00E+00 | 3.94E+05 | 0.00E+00 | 0.00E+00 | 0.00E+00 | 0.00E+00 | 0.00E+00 | 0.00E+00 | 0.00E+00 | 0.00E+00 | 0.00E+00 | 0.00E+00 | 0.00E+00 | 0.00E+00 | 0.00E+00 | 0.00E+00 | 0.00E+00 | 2.46E+04 | 4.93E+04 | 0.00E+00 | 9.85E+04 | 1.39E+05 | 0.00E+00 | 3.34E-01 |          |
| O00429-4;O00429-5;O00429-3;G8JLDS;O00429-2;O00429;O00429-8;O00429-6;O00429-7               | 0.00E+00 | 0.00E+00 | 0.00E+00 | 0.00E+00 | 1.21E+07 | 0.00E+00 | 0.00E+00 | 0.00E+00 | 0.00E+00 | 0.00E+00 | 0.00E+00 | 0.00E+00 | 0.00E+00 | 0.00E+00 | 0.00E+00 | 0.00E+00 | 0.00E+00 | 7.58E+05 | 1.52E+06 | 0.00E+00 | 3.03E+06 | 4.29E+06 | 0.00E+00 | 3.34E-01 |          |
| H0Y390;Q9UPN3-4;Q9UPN3-3;Q9UPN3-2;Q9UPN3;H3BPE1;H3BQ K9;H0Y314;Q9UPN3-5                    | 0.00E+00 | 0.00E+00 | 0.00E+00 | 0.00E+00 | 0.00E+00 | 0.00E+00 | 2.78E+05 | 0.00E+00 | 0.00E+00 | 0.00E+00 | 0.00E+00 | 0.00E+00 | 0.00E+00 | 0.00E+00 | 0.00E+00 | 0.00E+00 | 0.00E+00 | 1.74E+04 | 3.48E+04 | 0.00E+00 | 6.96E+04 | 9.84E+04 | 0.00E+00 | 3.34E-01 |          |
| H0Y4R1;P12268                                                                              | 0.00E+00 | 0.00E+00 | 0.00E+00 | 0.00E+00 | 0.00E+00 | 0.00E+00 | 0.00E+00 | 0.00E+00 | 0.00E+00 | 0.00E+00 | 0.00E+00 | 0.00E+00 | 0.00E+00 | 0.00E+00 | 0.00E+00 | 0.00E+00 | 0.00E+00 | 4.88E+05 | 0.00E+00 | 9.76E+05 | 1.95E+06 | 0.00E+00 | 2.76E+06 | 3.34E-01 |          |
| Q5T446;H0Y5R6;P06132                                                                       | 0.00E+00 | 0.00E+00 | 0.00E+00 | 0.00E+00 | 0.00E+00 | 0.00E+00 | 0.00E+00 | 0.00E+00 | 4.56E+05 | 0.00E+00 | 0.00E+00 | 0.00E+00 | 0.00E+00 | 0.00E+00 | 0.00E+00 | 0.00E+00 | 0.00E+00 | 2.85E+04 | 5.70E+04 | 0.00E+00 | 1.14E+05 | 1.61E+05 | 0.00E+00 | 3.34E-01 |          |
| H3BR27;P38159-3;H0Y6E7;H3BT71;Q96E3 9;P38159;H3BNC1;P38159-2                               | 0.00E+00 | 0.00E+00 | 0.00E+00 | 0.00E+00 | 0.00E+00 | 0.00E+00 | 0.00E+00 | 0.00E+00 | 0.00E+00 | 0.00E+00 | 0.00E+00 | 0.00E+00 | 0.00E+00 | 0.00E+00 | 0.00E+00 | 0.00E+00 | 0.00E+00 | 6.29E+05 | 3.93E+04 | 0.00E+00 | 7.86E+04 | 1.57E+05 | 0.00E+00 | 2.22E+05 | 3.34E-01 |

|                                                          |          |          |          |          |          |          |          |          |          |          |          |          |          |          |          |          |          |          |          |          |          |          |          |          |          |          |          |          |
|----------------------------------------------------------|----------|----------|----------|----------|----------|----------|----------|----------|----------|----------|----------|----------|----------|----------|----------|----------|----------|----------|----------|----------|----------|----------|----------|----------|----------|----------|----------|----------|
| H0Y750;O75787-2;O75787;H7C240;H7C3E1                     | 0.00E+00 | 0.00E+00 | 0.00E+00 | 0.00E+00 | 0.00E+00 | 0.00E+00 | 0.00E+00 | 0.00E+00 | 0.00E+00 | 0.00E+00 | 0.00E+00 | 0.00E+00 | 0.00E+00 | 0.00E+00 | 0.00E+00 | 0.00E+00 | 0.00E+00 | 7.86E+05 | 0.00E+00 | 4.91E+04 | 0.00E+00 | 9.82E+04 | 1.96E+05 | 0.00E+00 | 2.78E+05 | 3.34E-01 |          |          |
| H0YC27;H0YC67;H0YBD9;Q96DB5-2;Q96DB5                     | 0.00E+00 | 0.00E+00 | 0.00E+00 | 0.00E+00 | 0.00E+00 | 0.00E+00 | 1.72E+06 | 0.00E+00 | 0.00E+00 | 0.00E+00 | 0.00E+00 | 0.00E+00 | 0.00E+00 | 0.00E+00 | 0.00E+00 | 0.00E+00 | 0.00E+00 | 0.00E+00 | 0.00E+00 | 1.07E+05 | 2.14E+05 | 0.00E+00 | 4.29E+05 | 6.07E+05 | 0.00E+00 | 3.34E-01 |          |          |
| H0YC04;P21281                                            | 0.00E+00 | 0.00E+00 | 0.00E+00 | 0.00E+00 | 0.00E+00 | 0.00E+00 | 0.00E+00 | 9.42E+05 | 0.00E+00 | 0.00E+00 | 0.00E+00 | 0.00E+00 | 0.00E+00 | 0.00E+00 | 0.00E+00 | 0.00E+00 | 0.00E+00 | 0.00E+00 | 0.00E+00 | 5.89E+04 | 1.18E+05 | 0.00E+00 | 2.36E+05 | 3.33E+05 | 0.00E+00 | 3.34E-01 |          |          |
| H0YFA4;P52943;P52943-2;H0YHD8                            | 0.00E+00 | 0.00E+00 | 0.00E+00 | 0.00E+00 | 0.00E+00 | 0.00E+00 | 0.00E+00 | 0.00E+00 | 0.00E+00 | 0.00E+00 | 0.00E+00 | 0.00E+00 | 0.00E+00 | 0.00E+00 | 0.00E+00 | 0.00E+00 | 0.00E+00 | 9.45E+05 | 5.91E+04 | 0.00E+00 | 1.18E+05 | 2.36E+05 | 0.00E+00 | 3.34E+05 | 3.34E-01 |          |          |          |
| H0YGGJ7;H0YLP3;O75822-2;O75822-3;O75822                  | 0.00E+00 | 0.00E+00 | 0.00E+00 | 0.00E+00 | 0.00E+00 | 0.00E+00 | 0.00E+00 | 0.00E+00 | 0.00E+00 | 0.00E+00 | 6.32E+05 | 0.00E+00 | 0.00E+00 | 0.00E+00 | 0.00E+00 | 0.00E+00 | 0.00E+00 | 0.00E+00 | 0.00E+00 | 3.95E+04 | 0.00E+00 | 7.90E+04 | 1.58E+05 | 0.00E+00 | 2.23E+05 | 3.34E-01 |          |          |
| H7C015;H0YGN5;Q9Y697-2;Q9Y697-3;Q9Y697                   | 0.00E+00 | 0.00E+00 | 0.00E+00 | 0.00E+00 | 0.00E+00 | 0.00E+00 | 0.00E+00 | 0.00E+00 | 0.00E+00 | 0.00E+00 | 0.00E+00 | 0.00E+00 | 0.00E+00 | 0.00E+00 | 0.00E+00 | 0.00E+00 | 0.00E+00 | 1.46E+06 | 9.10E+04 | 0.00E+00 | 1.82E+05 | 3.64E+05 | 0.00E+00 | 5.15E+05 | 3.34E-01 |          |          |          |
| H0YHS6;Q9Y2Z4                                            | 0.00E+00 | 0.00E+00 | 0.00E+00 | 0.00E+00 | 0.00E+00 | 0.00E+00 | 0.00E+00 | 0.00E+00 | 0.00E+00 | 0.00E+00 | 0.00E+00 | 0.00E+00 | 0.00E+00 | 0.00E+00 | 1.70E+06 | 0.00E+00 | 0.00E+00 | 0.00E+00 | 0.00E+00 | 1.06E+05 | 0.00E+00 | 2.12E+05 | 4.24E+05 | 0.00E+00 | 6.00E+05 | 3.34E-01 |          |          |
| H0YIB4;S4R3G0;Q13242                                     | 0.00E+00 | 0.00E+00 | 0.00E+00 | 0.00E+00 | 0.00E+00 | 0.00E+00 | 0.00E+00 | 0.00E+00 | 1.17E+06 | 0.00E+00 | 0.00E+00 | 0.00E+00 | 0.00E+00 | 0.00E+00 | 0.00E+00 | 0.00E+00 | 0.00E+00 | 0.00E+00 | 0.00E+00 | 7.31E+04 | 1.46E+05 | 0.00E+00 | 2.92E+05 | 4.14E+05 | 0.00E+00 | 3.34E-01 |          |          |
| H0YN26;P39687                                            | 0.00E+00 | 0.00E+00 | 0.00E+00 | 0.00E+00 | 0.00E+00 | 0.00E+00 | 0.00E+00 | 0.00E+00 | 0.00E+00 | 0.00E+00 | 0.00E+00 | 0.00E+00 | 0.00E+00 | 0.00E+00 | 0.00E+00 | 0.00E+00 | 0.00E+00 | 0.00E+00 | 1.07E+06 | 6.68E+04 | 0.00E+00 | 1.34E+05 | 2.67E+05 | 0.00E+00 | 3.78E+05 | 3.34E-01 |          |          |
| H3BLU7;O43488                                            | 0.00E+00 | 0.00E+00 | 0.00E+00 | 0.00E+00 | 0.00E+00 | 0.00E+00 | 0.00E+00 | 0.00E+00 | 0.00E+00 | 0.00E+00 | 0.00E+00 | 0.00E+00 | 0.00E+00 | 0.00E+00 | 0.00E+00 | 0.00E+00 | 0.00E+00 | 0.00E+00 | 2.61E+06 | 1.63E+05 | 0.00E+00 | 3.26E+05 | 6.52E+05 | 0.00E+00 | 9.22E+05 | 3.34E-01 |          |          |
| Q92841-1;Q92841-3;Q92841-2;Q92841;H3BLZ8                 | 0.00E+00 | 0.00E+00 | 0.00E+00 | 0.00E+00 | 0.00E+00 | 3.37E+06 | 0.00E+00 | 0.00E+00 | 0.00E+00 | 0.00E+00 | 0.00E+00 | 0.00E+00 | 0.00E+00 | 0.00E+00 | 0.00E+00 | 0.00E+00 | 0.00E+00 | 0.00E+00 | 0.00E+00 | 2.10E+05 | 4.21E+05 | 0.00E+00 | 8.41E+05 | 1.19E+06 | 0.00E+00 | 3.34E-01 |          |          |
| H3BV04;H3BN93;H3BUB6;H3BPL9;O15127                       | 0.00E+00 | 0.00E+00 | 0.00E+00 | 0.00E+00 | 0.00E+00 | 0.00E+00 | 0.00E+00 | 0.00E+00 | 0.00E+00 | 0.00E+00 | 0.00E+00 | 0.00E+00 | 0.00E+00 | 0.00E+00 | 0.00E+00 | 0.00E+00 | 0.00E+00 | 0.00E+00 | 0.00E+00 | 5.76E+05 | 3.60E+04 | 0.00E+00 | 7.20E+04 | 1.44E+05 | 0.00E+00 | 2.04E+05 | 3.34E-01 |          |
| P80404;H3BRN4;H3BNQ7;H3BPW8                              | 0.00E+00 | 0.00E+00 | 0.00E+00 | 0.00E+00 | 0.00E+00 | 0.00E+00 | 0.00E+00 | 7.82E+05 | 0.00E+00 | 0.00E+00 | 0.00E+00 | 0.00E+00 | 0.00E+00 | 0.00E+00 | 0.00E+00 | 0.00E+00 | 0.00E+00 | 0.00E+00 | 0.00E+00 | 0.00E+00 | 4.89E+04 | 9.77E+04 | 0.00E+00 | 1.95E+05 | 2.76E+05 | 0.00E+00 | 3.34E-01 |          |
| H3BPW3;O75208-2;H3BVA5;H3BPC6;H3BR0;H3BSJ5;H3BNT2;O75208 | 0.00E+00 | 0.00E+00 | 0.00E+00 | 0.00E+00 | 0.00E+00 | 0.00E+00 | 0.00E+00 | 0.00E+00 | 0.00E+00 | 0.00E+00 | 0.00E+00 | 0.00E+00 | 0.00E+00 | 0.00E+00 | 0.00E+00 | 0.00E+00 | 0.00E+00 | 0.00E+00 | 0.00E+00 | 7.47E+05 | 4.67E+04 | 0.00E+00 | 9.33E+04 | 1.87E+05 | 0.00E+00 | 2.64E+05 | 3.34E-01 |          |
| H3BQI7;H3BT52;Q3SXM5-2;Q3SXM5                            | 0.00E+00 | 0.00E+00 | 0.00E+00 | 0.00E+00 | 0.00E+00 | 0.00E+00 | 0.00E+00 | 0.00E+00 | 0.00E+00 | 0.00E+00 | 0.00E+00 | 0.00E+00 | 0.00E+00 | 0.00E+00 | 2.58E+06 | 0.00E+00 | 0.00E+00 | 0.00E+00 | 0.00E+00 | 0.00E+00 | 1.62E+05 | 0.00E+00 | 3.23E+05 | 6.46E+05 | 0.00E+00 | 9.14E+05 | 3.34E-01 |          |
| H3BV15;H3BRD9;Q8N1F7-2;Q8N1F7;H3BVG0                     | 9.71E+05 | 0.00E+00 | 0.00E+00 | 0.00E+00 | 0.00E+00 | 0.00E+00 | 0.00E+00 | 0.00E+00 | 0.00E+00 | 0.00E+00 | 0.00E+00 | 0.00E+00 | 0.00E+00 | 0.00E+00 | 0.00E+00 | 0.00E+00 | 0.00E+00 | 0.00E+00 | 0.00E+00 | 0.00E+00 | 6.07E+04 | 1.21E+05 | 0.00E+00 | 2.43E+05 | 3.43E+05 | 0.00E+00 | 3.34E-01 |          |
| Q00059-2;H7BYN3;Q00059                                   | 0.00E+00 | 0.00E+00 | 0.00E+00 | 0.00E+00 | 0.00E+00 | 0.00E+00 | 0.00E+00 | 0.00E+00 | 0.00E+00 | 0.00E+00 | 0.00E+00 | 0.00E+00 | 0.00E+00 | 0.00E+00 | 1.46E+06 | 0.00E+00 | 0.00E+00 | 0.00E+00 | 0.00E+00 | 0.00E+00 | 9.11E+04 | 0.00E+00 | 1.82E+05 | 3.64E+05 | 0.00E+00 | 5.15E+05 | 3.34E-01 |          |
| H7BZ81;Q6NUM9-2;Q6NUM9;H7BZ16;H7C3J0                     | 0.00E+00 | 0.00E+00 | 0.00E+00 | 0.00E+00 | 1.01E+06 | 0.00E+00 | 0.00E+00 | 0.00E+00 | 0.00E+00 | 0.00E+00 | 0.00E+00 | 0.00E+00 | 0.00E+00 | 0.00E+00 | 0.00E+00 | 0.00E+00 | 0.00E+00 | 0.00E+00 | 0.00E+00 | 0.00E+00 | 6.28E+04 | 1.26E+05 | 0.00E+00 | 2.51E+05 | 3.55E+05 | 0.00E+00 | 3.34E-01 |          |
| H7C0X8;P40121-2;P40121                                   | 0.00E+00 | 0.00E+00 | 3.53E+05 | 0.00E+00 | 0.00E+00 | 0.00E+00 | 0.00E+00 | 0.00E+00 | 0.00E+00 | 0.00E+00 | 0.00E+00 | 0.00E+00 | 0.00E+00 | 0.00E+00 | 0.00E+00 | 0.00E+00 | 0.00E+00 | 0.00E+00 | 0.00E+00 | 0.00E+00 | 2.20E+04 | 4.41E+04 | 0.00E+00 | 8.82E+04 | 1.25E+05 | 0.00E+00 | 3.34E-01 |          |
| H7C4F6;O00629                                            | 0.00E+00 | 0.00E+00 | 0.00E+00 | 0.00E+00 | 0.00E+00 | 1.45E+06 | 0.00E+00 | 0.00E+00 | 0.00E+00 | 0.00E+00 | 0.00E+00 | 0.00E+00 | 0.00E+00 | 0.00E+00 | 0.00E+00 | 0.00E+00 | 0.00E+00 | 0.00E+00 | 0.00E+00 | 0.00E+00 | 9.06E+04 | 1.81E+05 | 0.00E+00 | 3.62E+05 | 5.12E+05 | 0.00E+00 | 3.34E-01 |          |
| M0R2V8;H9KV91;Q96B36                                     | 2.36E+06 | 0.00E+00 | 0.00E+00 | 0.00E+00 | 0.00E+00 | 0.00E+00 | 0.00E+00 | 0.00E+00 | 0.00E+00 | 0.00E+00 | 0.00E+00 | 0.00E+00 | 0.00E+00 | 0.00E+00 | 0.00E+00 | 0.00E+00 | 0.00E+00 | 0.00E+00 | 0.00E+00 | 0.00E+00 | 1.47E+05 | 2.95E+05 | 0.00E+00 | 5.90E+05 | 8.34E+05 | 0.00E+00 | 3.34E-01 |          |
| P46459-2;I3L0N3;P46459;I3L2G1;K7EQD6                     | 0.00E+00 | 0.00E+00 | 0.00E+00 | 0.00E+00 | 0.00E+00 | 0.00E+00 | 0.00E+00 | 0.00E+00 | 0.00E+00 | 0.00E+00 | 0.00E+00 | 0.00E+00 | 0.00E+00 | 0.00E+00 | 1.07E+05 | 0.00E+00 | 0.00E+00 | 0.00E+00 | 0.00E+00 | 0.00E+00 | 6.69E+03 | 0.00E+00 | 1.34E+04 | 2.67E+04 | 0.00E+00 | 3.78E+04 | 3.34E-01 |          |
| I3L0P9;Q8N137-5;Q8N137;Q8N137-3;Q8N137-2                 | 0.00E+00 | 0.00E+00 | 0.00E+00 | 0.00E+00 | 0.00E+00 | 0.00E+00 | 0.00E+00 | 0.00E+00 | 0.00E+00 | 0.00E+00 | 7.70E+05 | 0.00E+00 | 0.00E+00 | 0.00E+00 | 0.00E+00 | 0.00E+00 | 0.00E+00 | 0.00E+00 | 0.00E+00 | 0.00E+00 | 4.81E+04 | 0.00E+00 | 9.62E+04 | 1.92E+05 | 0.00E+00 | 2.72E+05 | 3.34E-01 |          |
| P46108-2;I3L297;P46108                                   | 0.00E+00 | 0.00E+00 | 0.00E+00 | 0.00E+00 | 0.00E+00 | 0.00E+00 | 0.00E+00 | 9.78E+05 | 0.00E+00 | 0.00E+00 | 0.00E+00 | 0.00E+00 | 0.00E+00 | 0.00E+00 | 0.00E+00 | 0.00E+00 | 0.00E+00 | 0.00E+00 | 0.00E+00 | 0.00E+00 | 6.11E+04 | 1.22E+05 | 0.00E+00 | 2.44E+05 | 3.46E+05 | 0.00E+00 | 3.34E-01 |          |
| I3L3E9;P39748-2;P39748                                   | 0.00E+00 | 0.00E+00 | 0.00E+00 | 0.00E+00 | 0.00E+00 | 0.00E+00 | 0.00E+00 | 0.00E+00 | 0.00E+00 | 0.00E+00 | 0.00E+00 | 0.00E+00 | 0.00E+00 | 0.00E+00 | 0.00E+00 | 0.00E+00 | 0.00E+00 | 0.00E+00 | 0.00E+00 | 0.00E+00 | 1.40E+05 | 8.76E+03 | 0.00E+00 | 1.75E+04 | 3.50E+04 | 0.00E+00 | 4.95E+04 | 3.34E-01 |
| Q5VYK3;J3KN16                                            | 0.00E+00 | 0.00E+00 | 0.00E+00 | 0.00E+00 | 0.00E+00 | 0.00E+00 | 0.00E+00 | 0.00E+00 | 0.00E+00 | 0.00E+00 | 0.00E+00 | 0.00E+00 | 0.00E+00 | 0.00E+00 | 0.00E+00 | 0.00E+00 | 0.00E+00 | 0.00E+00 | 0.00E+00 | 0.00E+00 | 1.07E+07 | 6.66E+05 | 0.00E+00 | 1.33E+06 | 2.66E+06 | 0.00E+00 | 3.77E+06 | 3.34E-01 |
| J3QL05;J3KP15;Q01130-2;Q01130;Q9BRL6-2;Q9BRL6            | 0.00E+00 | 0.00E+00 | 0.00E+00 | 0.00E+00 | 0.00E+00 | 0.00E+00 | 0.00E+00 | 0.00E+00 | 0.00E+00 | 8.08E+05 | 0.00E+00 | 0.00E+00 | 0.00E+00 | 0.00E+00 | 0.00E+00 | 0.00E+00 | 0.00E+00 | 0.00E+00 | 0.00E+00 | 0.00E+00 | 5.05E+04 | 0.00E+00 | 1.01E+05 | 2.02E+05 | 0.00E+00 | 2.86E+05 | 3.34E-01 |          |
| J3QL56;O75880                                            | 0.00E+00 | 0.00E+00 | 0.00E+00 | 0.00E+00 | 0.00E+00 | 0.00E+00 | 0.00E+00 | 0.00E+00 | 0.00E+00 | 0.00E+00 | 0.00E+00 | 0.00E+00 | 0.00E+00 | 0.00E+00 | 4.47E+06 | 0.00E+00 | 0.00E+00 | 0.00E+00 | 0.00E+00 | 0.00E+00 | 2.79E+05 | 0.00E+00 | 5.59E+05 | 1.12E+06 | 0.00E+00 | 1.58E+06 | 3.34E-01 |          |



|                                                                            |          |          |          |          |          |          |          |          |          |          |          |          |          |          |          |          |          |          |          |          |          |          |          |          |          |          |          |
|----------------------------------------------------------------------------|----------|----------|----------|----------|----------|----------|----------|----------|----------|----------|----------|----------|----------|----------|----------|----------|----------|----------|----------|----------|----------|----------|----------|----------|----------|----------|----------|
| Q15642-5;MOR2H7;Q15642-4;Q15642-2;W4VSO9;Q15642-3;Q15642                   | 0.00E+00 | 0.00E+00 | 0.00E+00 | 0.00E+00 | 0.00E+00 | 0.00E+00 | 0.00E+00 | 0.00E+00 | 0.00E+00 | 0.00E+00 | 0.00E+00 | 0.00E+00 | 0.00E+00 | 0.00E+00 | 0.00E+00 | 0.00E+00 | 0.00E+00 | 1.37E+06 | 8.55E+04 | 0.00E+00 | 1.71E+05 | 3.42E+05 | 0.00E+00 | 4.84E+05 | 3.34E-01 |          |          |
| MOR389;Q15102;M0QXS6;MOR323;M0QZT2                                         | 0.00E+00 | 0.00E+00 | 0.00E+00 | 0.00E+00 | 0.00E+00 | 0.00E+00 | 0.00E+00 | 0.00E+00 | 0.00E+00 | 0.00E+00 | 0.00E+00 | 0.00E+00 | 0.00E+00 | 0.00E+00 | 0.00E+00 | 0.00E+00 | 1.73E+06 | 0.00E+00 | 0.00E+00 | 1.08E+05 | 0.00E+00 | 2.16E+05 | 4.32E+05 | 0.00E+00 | 6.11E+05 | 3.34E-01 |          |
| P67870;Q5SRQ3;Q5SRQ6;N0E472                                                | 0.00E+00 | 0.00E+00 | 0.00E+00 | 0.00E+00 | 0.00E+00 | 0.00E+00 | 0.00E+00 | 0.00E+00 | 0.00E+00 | 0.00E+00 | 6.32E+06 | 0.00E+00 | 0.00E+00 | 0.00E+00 | 0.00E+00 | 0.00E+00 | 0.00E+00 | 0.00E+00 | 3.95E+05 | 0.00E+00 | 7.89E+05 | 1.58E+06 | 0.00E+00 | 2.23E+06 | 3.34E-01 |          |          |
| O00186                                                                     | 0.00E+00 | 0.00E+00 | 0.00E+00 | 0.00E+00 | 0.00E+00 | 0.00E+00 | 0.00E+00 | 2.77E+05 | 0.00E+00 | 0.00E+00 | 0.00E+00 | 0.00E+00 | 0.00E+00 | 0.00E+00 | 0.00E+00 | 0.00E+00 | 0.00E+00 | 0.00E+00 | 1.73E+04 | 3.46E+04 | 0.00E+00 | 6.92E+04 | 9.79E+04 | 0.00E+00 | 3.34E-01 |          |          |
| O00303                                                                     | 0.00E+00 | 0.00E+00 | 0.00E+00 | 0.00E+00 | 0.00E+00 | 0.00E+00 | 0.00E+00 | 0.00E+00 | 0.00E+00 | 0.00E+00 | 0.00E+00 | 0.00E+00 | 0.00E+00 | 0.00E+00 | 0.00E+00 | 0.00E+00 | 0.00E+00 | 0.00E+00 | 1.15E+05 | 0.00E+00 | 2.29E+05 | 4.59E+05 | 0.00E+00 | 6.49E+05 | 3.34E-01 |          |          |
| O00411                                                                     | 0.00E+00 | 0.00E+00 | 0.00E+00 | 0.00E+00 | 0.00E+00 | 0.00E+00 | 0.00E+00 | 8.19E+06 | 0.00E+00 | 0.00E+00 | 0.00E+00 | 0.00E+00 | 0.00E+00 | 0.00E+00 | 0.00E+00 | 0.00E+00 | 0.00E+00 | 0.00E+00 | 5.12E+05 | 1.02E+06 | 0.00E+00 | 2.05E+06 | 2.90E+06 | 0.00E+00 | 3.34E-01 |          |          |
| O00425                                                                     | 0.00E+00 | 0.00E+00 | 0.00E+00 | 0.00E+00 | 3.28E+06 | 0.00E+00 | 0.00E+00 | 0.00E+00 | 0.00E+00 | 0.00E+00 | 0.00E+00 | 0.00E+00 | 0.00E+00 | 0.00E+00 | 0.00E+00 | 0.00E+00 | 0.00E+00 | 0.00E+00 | 2.05E+05 | 4.11E+05 | 0.00E+00 | 8.21E+05 | 1.16E+06 | 0.00E+00 | 3.34E-01 |          |          |
| O00487                                                                     | 0.00E+00 | 0.00E+00 | 0.00E+00 | 0.00E+00 | 0.00E+00 | 2.98E+06 | 0.00E+00 | 0.00E+00 | 0.00E+00 | 0.00E+00 | 0.00E+00 | 0.00E+00 | 0.00E+00 | 0.00E+00 | 0.00E+00 | 0.00E+00 | 0.00E+00 | 0.00E+00 | 1.86E+05 | 3.73E+05 | 0.00E+00 | 7.45E+05 | 1.05E+06 | 0.00E+00 | 3.34E-01 |          |          |
| O00560-2;O00560;B4DHNS;E9PB;U7;O00560-3;G5EA09                             | 0.00E+00 | 3.59E+06 | 0.00E+00 | 0.00E+00 | 0.00E+00 | 0.00E+00 | 0.00E+00 | 0.00E+00 | 0.00E+00 | 0.00E+00 | 0.00E+00 | 0.00E+00 | 0.00E+00 | 0.00E+00 | 0.00E+00 | 0.00E+00 | 0.00E+00 | 0.00E+00 | 2.25E+05 | 4.49E+05 | 0.00E+00 | 8.98E+05 | 1.27E+06 | 0.00E+00 | 3.34E-01 |          |          |
| O00767                                                                     | 0.00E+00 | 0.00E+00 | 0.00E+00 | 0.00E+00 | 0.00E+00 | 0.00E+00 | 0.00E+00 | 0.00E+00 | 0.00E+00 | 0.00E+00 | 0.00E+00 | 0.00E+00 | 0.00E+00 | 0.00E+00 | 0.00E+00 | 0.00E+00 | 0.00E+00 | 1.70E+06 | 1.07E+05 | 0.00E+00 | 2.13E+05 | 4.26E+05 | 0.00E+00 | 6.03E+05 | 3.34E-01 |          |          |
| O14617-4;O14617;O14617-5;O14617-3;O14617-2                                 | 0.00E+00 | 0.00E+00 | 0.00E+00 | 0.00E+00 | 0.00E+00 | 0.00E+00 | 0.00E+00 | 0.00E+00 | 0.00E+00 | 0.00E+00 | 0.00E+00 | 0.00E+00 | 0.00E+00 | 0.00E+00 | 0.00E+00 | 0.00E+00 | 0.00E+00 | 0.00E+00 | 3.55E+04 | 0.00E+00 | 7.10E+04 | 1.42E+05 | 0.00E+00 | 2.01E+05 | 3.34E-01 |          |          |
| O14656                                                                     | 0.00E+00 | 0.00E+00 | 0.00E+00 | 0.00E+00 | 0.00E+00 | 0.00E+00 | 0.00E+00 | 0.00E+00 | 0.00E+00 | 0.00E+00 | 0.00E+00 | 0.00E+00 | 0.00E+00 | 0.00E+00 | 0.00E+00 | 0.00E+00 | 0.00E+00 | 0.00E+00 | 1.65E+05 | 0.00E+00 | 3.30E+05 | 6.59E+05 | 0.00E+00 | 9.33E+05 | 3.34E-01 |          |          |
| O14745;J3QRP6                                                              | 0.00E+00 | 0.00E+00 | 0.00E+00 | 0.00E+00 | 0.00E+00 | 0.00E+00 | 4.99E+06 | 0.00E+00 | 0.00E+00 | 0.00E+00 | 0.00E+00 | 0.00E+00 | 0.00E+00 | 0.00E+00 | 0.00E+00 | 0.00E+00 | 0.00E+00 | 0.00E+00 | 3.12E+05 | 6.24E+05 | 0.00E+00 | 1.25E+06 | 1.76E+06 | 0.00E+00 | 3.34E-01 |          |          |
| O14773-2;O14773                                                            | 0.00E+00 | 0.00E+00 | 0.00E+00 | 0.00E+00 | 0.00E+00 | 0.00E+00 | 0.00E+00 | 0.00E+00 | 0.00E+00 | 0.00E+00 | 0.00E+00 | 0.00E+00 | 0.00E+00 | 0.00E+00 | 0.00E+00 | 0.00E+00 | 0.00E+00 | 0.00E+00 | 2.02E+05 | 0.00E+00 | 4.03E+05 | 8.07E+05 | 0.00E+00 | 1.14E+06 | 3.34E-01 |          |          |
| O14925;Q5SRD1;B4DDK6                                                       | 0.00E+00 | 0.00E+00 | 0.00E+00 | 0.00E+00 | 0.00E+00 | 0.00E+00 | 0.00E+00 | 0.00E+00 | 0.00E+00 | 0.00E+00 | 3.28E+06 | 0.00E+00 | 0.00E+00 | 0.00E+00 | 0.00E+00 | 0.00E+00 | 0.00E+00 | 0.00E+00 | 2.05E+05 | 0.00E+00 | 4.10E+05 | 8.20E+05 | 0.00E+00 | 1.16E+06 | 3.34E-01 |          |          |
| O15042-2;O15042;U3KPPT1;C9JDJ7;C9J5L1;E7EW00;H0Y8D9;C9JB80;O15042-3;E7ET15 | 0.00E+00 | 0.00E+00 | 0.00E+00 | 0.00E+00 | 0.00E+00 | 0.00E+00 | 2.19E+06 | 0.00E+00 | 0.00E+00 | 0.00E+00 | 0.00E+00 | 0.00E+00 | 0.00E+00 | 0.00E+00 | 0.00E+00 | 0.00E+00 | 0.00E+00 | 0.00E+00 | 1.37E+05 | 2.74E+05 | 0.00E+00 | 5.48E+05 | 7.75E+05 | 0.00E+00 | 3.34E-01 |          |          |
| O15050                                                                     | 0.00E+00 | 0.00E+00 | 0.00E+00 | 0.00E+00 | 0.00E+00 | 0.00E+00 | 0.00E+00 | 0.00E+00 | 0.00E+00 | 0.00E+00 | 0.00E+00 | 0.00E+00 | 1.24E+06 | 0.00E+00 | 0.00E+00 | 0.00E+00 | 0.00E+00 | 0.00E+00 | 7.74E+04 | 0.00E+00 | 1.55E+05 | 3.10E+05 | 0.00E+00 | 4.38E+05 | 3.34E-01 |          |          |
| O15067;J3KQTQ5                                                             | 0.00E+00 | 0.00E+00 | 0.00E+00 | 0.00E+00 | 0.00E+00 | 0.00E+00 | 0.00E+00 | 3.44E+06 | 0.00E+00 | 0.00E+00 | 0.00E+00 | 0.00E+00 | 0.00E+00 | 0.00E+00 | 0.00E+00 | 0.00E+00 | 0.00E+00 | 0.00E+00 | 2.15E+05 | 4.30E+05 | 0.00E+00 | 8.61E+05 | 1.22E+06 | 0.00E+00 | 3.34E-01 |          |          |
| O15118                                                                     | 0.00E+00 | 0.00E+00 | 0.00E+00 | 0.00E+00 | 0.00E+00 | 0.00E+00 | 0.00E+00 | 3.51E+06 | 0.00E+00 | 0.00E+00 | 0.00E+00 | 0.00E+00 | 0.00E+00 | 0.00E+00 | 0.00E+00 | 0.00E+00 | 0.00E+00 | 0.00E+00 | 2.20E+05 | 4.39E+05 | 0.00E+00 | 8.78E+05 | 1.24E+06 | 0.00E+00 | 3.34E-01 |          |          |
| O15143;C9JTT6;C9JB7;C9K057;C9J4Z7;F8VXW2;C9JY1;C9JQM8;C9JFG9;C9J6C8        | 0.00E+00 | 0.00E+00 | 0.00E+00 | 0.00E+00 | 9.66E+05 | 0.00E+00 | 0.00E+00 | 0.00E+00 | 0.00E+00 | 0.00E+00 | 0.00E+00 | 0.00E+00 | 0.00E+00 | 0.00E+00 | 0.00E+00 | 0.00E+00 | 0.00E+00 | 0.00E+00 | 6.04E+04 | 1.21E+05 | 0.00E+00 | 2.42E+05 | 3.42E+05 | 0.00E+00 | 3.34E-01 |          |          |
| O15144                                                                     | 0.00E+00 | 0.00E+00 | 4.73E+05 | 0.00E+00 | 0.00E+00 | 0.00E+00 | 0.00E+00 | 0.00E+00 | 0.00E+00 | 0.00E+00 | 0.00E+00 | 0.00E+00 | 0.00E+00 | 0.00E+00 | 0.00E+00 | 0.00E+00 | 0.00E+00 | 0.00E+00 | 2.96E+04 | 5.92E+04 | 0.00E+00 | 1.18E+05 | 1.67E+05 | 0.00E+00 | 3.34E-01 |          |          |
| O15355                                                                     | 0.00E+00 | 0.00E+00 | 0.00E+00 | 0.00E+00 | 0.00E+00 | 0.00E+00 | 0.00E+00 | 4.44E+06 | 0.00E+00 | 0.00E+00 | 0.00E+00 | 0.00E+00 | 0.00E+00 | 0.00E+00 | 0.00E+00 | 0.00E+00 | 0.00E+00 | 0.00E+00 | 2.77E+05 | 5.54E+05 | 0.00E+00 | 1.11E+06 | 1.57E+06 | 0.00E+00 | 3.34E-01 |          |          |
| O15460-2;O15460                                                            | 0.00E+00 | 0.00E+00 | 0.00E+00 | 0.00E+00 | 0.00E+00 | 5.38E+06 | 0.00E+00 | 0.00E+00 | 0.00E+00 | 0.00E+00 | 0.00E+00 | 0.00E+00 | 0.00E+00 | 0.00E+00 | 0.00E+00 | 0.00E+00 | 0.00E+00 | 0.00E+00 | 3.36E+05 | 6.72E+05 | 0.00E+00 | 1.34E+06 | 1.90E+06 | 0.00E+00 | 3.34E-01 |          |          |
| Q6SZU1;O43175                                                              | 0.00E+00 | 0.00E+00 | 0.00E+00 | 0.00E+00 | 0.00E+00 | 0.00E+00 | 1.22E+06 | 0.00E+00 | 0.00E+00 | 0.00E+00 | 0.00E+00 | 0.00E+00 | 0.00E+00 | 0.00E+00 | 0.00E+00 | 0.00E+00 | 0.00E+00 | 0.00E+00 | 7.66E+04 | 1.53E+05 | 0.00E+00 | 3.06E+05 | 4.33E+05 | 0.00E+00 | 3.34E-01 |          |          |
| O43242;O43242-2                                                            | 0.00E+00 | 0.00E+00 | 0.00E+00 | 0.00E+00 | 0.00E+00 | 0.00E+00 | 0.00E+00 | 0.00E+00 | 0.00E+00 | 0.00E+00 | 0.00E+00 | 0.00E+00 | 0.00E+00 | 0.00E+00 | 0.00E+00 | 0.00E+00 | 0.00E+00 | 0.00E+00 | 9.52E+04 | 0.00E+00 | 1.90E+05 | 3.81E+05 | 0.00E+00 | 5.39E+05 | 3.34E-01 |          |          |
| O43395                                                                     | 0.00E+00 | 0.00E+00 | 0.00E+00 | 5.99E+06 | 0.00E+00 | 0.00E+00 | 0.00E+00 | 0.00E+00 | 0.00E+00 | 0.00E+00 | 0.00E+00 | 0.00E+00 | 0.00E+00 | 0.00E+00 | 0.00E+00 | 0.00E+00 | 0.00E+00 | 0.00E+00 | 3.74E+05 | 7.48E+05 | 0.00E+00 | 1.50E+06 | 2.12E+06 | 0.00E+00 | 3.34E-01 |          |          |
| O43396;K7ER96;K7EML9                                                       | 0.00E+00 | 0.00E+00 | 0.00E+00 | 0.00E+00 | 0.00E+00 | 0.00E+00 | 0.00E+00 | 0.00E+00 | 0.00E+00 | 0.00E+00 | 0.00E+00 | 0.00E+00 | 0.00E+00 | 0.00E+00 | 0.00E+00 | 0.00E+00 | 0.00E+00 | 0.00E+00 | 1.55E+07 | 9.70E+05 | 0.00E+00 | 1.94E+06 | 3.88E+06 | 0.00E+00 | 5.49E+06 | 3.34E-01 |          |
| O43464-3;O43464;O43464-2;O43464-4                                          | 0.00E+00 | 0.00E+00 | 0.00E+00 | 0.00E+00 | 0.00E+00 | 0.00E+00 | 0.00E+00 | 3.37E+06 | 0.00E+00 | 0.00E+00 | 0.00E+00 | 0.00E+00 | 0.00E+00 | 0.00E+00 | 0.00E+00 | 0.00E+00 | 0.00E+00 | 0.00E+00 | 2.11E+05 | 4.22E+05 | 0.00E+00 | 8.43E+05 | 1.19E+06 | 0.00E+00 | 3.34E-01 |          |          |
| O43707;O43707-2;O43707-3;F5GXS2                                            | 0.00E+00 | 0.00E+00 | 0.00E+00 | 0.00E+00 | 0.00E+00 | 0.00E+00 | 0.00E+00 | 0.00E+00 | 0.00E+00 | 0.00E+00 | 0.00E+00 | 0.00E+00 | 0.00E+00 | 0.00E+00 | 0.00E+00 | 0.00E+00 | 0.00E+00 | 0.00E+00 | 1.30E+07 | 0.00E+00 | 8.10E+05 | 0.00E+00 | 1.62E+06 | 3.24E+06 | 0.00E+00 | 4.58E+06 | 3.34E-01 |
| O43719                                                                     | 0.00E+00 | 1.85E+06 | 0.00E+00 | 0.00E+00 | 0.00E+00 | 0.00E+00 | 0.00E+00 | 0.00E+00 | 0.00E+00 | 0.00E+00 | 0.00E+00 | 0.00E+00 | 0.00E+00 | 0.00E+00 | 0.00E+00 | 0.00E+00 | 0.00E+00 | 0.00E+00 | 1.16E+05 | 2.31E+05 | 0.00E+00 | 4.63E+05 | 6.55E+05 | 0.00E+00 | 3.34E-01 |          |          |

|                                                                           |          |          |          |          |          |          |          |          |          |          |          |          |          |          |          |          |          |          |          |          |          |          |          |          |          |
|---------------------------------------------------------------------------|----------|----------|----------|----------|----------|----------|----------|----------|----------|----------|----------|----------|----------|----------|----------|----------|----------|----------|----------|----------|----------|----------|----------|----------|----------|
| O43760;O43760-2;K7ELD9;K7ENG9;K7EJ35                                      | 0.00E+00 | 0.00E+00 | 0.00E+00 | 0.00E+00 | 0.00E+00 | 0.00E+00 | 0.00E+00 | 2.02E+07 | 0.00E+00 | 0.00E+00 | 0.00E+00 | 0.00E+00 | 0.00E+00 | 0.00E+00 | 0.00E+00 | 0.00E+00 | 0.00E+00 | 1.26E+06 | 2.53E+06 | 0.00E+00 | 5.06E+06 | 7.15E+06 | 0.00E+00 | 3.34E-01 |          |
| O43776                                                                    | 0.00E+00 | 0.00E+00 | 0.00E+00 | 0.00E+00 | 0.00E+00 | 0.00E+00 | 0.00E+00 | 0.00E+00 | 0.00E+00 | 0.00E+00 | 0.00E+00 | 0.00E+00 | 0.00E+00 | 0.00E+00 | 0.00E+00 | 0.00E+00 | 0.00E+00 | 1.25E+04 | 0.00E+00 | 2.50E+04 | 5.00E+04 | 0.00E+00 | 7.07E+04 | 3.34E-01 |          |
| O43790                                                                    | 0.00E+00 | 0.00E+00 | 0.00E+00 | 0.00E+00 | 0.00E+00 | 0.00E+00 | 0.00E+00 | 0.00E+00 | 0.00E+00 | 0.00E+00 | 0.00E+00 | 0.00E+00 | 0.00E+00 | 0.00E+00 | 0.00E+00 | 0.00E+00 | 0.00E+00 | 7.01E+05 | 0.00E+00 | 1.40E+06 | 2.80E+06 | 0.00E+00 | 3.96E+06 | 3.34E-01 |          |
| O43823                                                                    | 0.00E+00 | 0.00E+00 | 0.00E+00 | 0.00E+00 | 0.00E+00 | 0.00E+00 | 0.00E+00 | 0.00E+00 | 0.00E+00 | 0.00E+00 | 0.00E+00 | 0.00E+00 | 0.00E+00 | 0.00E+00 | 0.00E+00 | 0.00E+00 | 0.00E+00 | 3.16E+05 | 1.97E+04 | 0.00E+00 | 3.95E+04 | 7.89E+04 | 0.00E+00 | 1.12E+05 | 3.34E-01 |
| O43852-13;O43852-14;O43852-11;O43852-10;O43852-5;O43852-6;O43852;O43852-3 | 0.00E+00 | 0.00E+00 | 0.00E+00 | 0.00E+00 | 0.00E+00 | 7.92E+05 | 0.00E+00 | 0.00E+00 | 0.00E+00 | 0.00E+00 | 0.00E+00 | 0.00E+00 | 0.00E+00 | 0.00E+00 | 0.00E+00 | 0.00E+00 | 0.00E+00 | 4.95E+04 | 9.90E+04 | 0.00E+00 | 1.98E+05 | 2.80E+05 | 0.00E+00 | 3.34E-01 |          |
| O60264                                                                    | 0.00E+00 | 0.00E+00 | 0.00E+00 | 0.00E+00 | 0.00E+00 | 0.00E+00 | 0.00E+00 | 0.00E+00 | 0.00E+00 | 0.00E+00 | 0.00E+00 | 0.00E+00 | 0.00E+00 | 0.00E+00 | 0.00E+00 | 0.00E+00 | 0.00E+00 | 3.15E+06 | 1.97E+05 | 0.00E+00 | 3.94E+05 | 7.88E+05 | 0.00E+00 | 1.11E+06 | 3.34E-01 |
| O60268-2;O60268-3;O60268                                                  | 0.00E+00 | 0.00E+00 | 0.00E+00 | 0.00E+00 | 0.00E+00 | 0.00E+00 | 0.00E+00 | 0.00E+00 | 0.00E+00 | 0.00E+00 | 0.00E+00 | 0.00E+00 | 0.00E+00 | 0.00E+00 | 0.00E+00 | 0.00E+00 | 0.00E+00 | 8.08E+05 | 5.05E+04 | 0.00E+00 | 1.01E+05 | 2.02E+05 | 0.00E+00 | 2.86E+05 | 3.34E-01 |
| O60306                                                                    | 0.00E+00 | 0.00E+00 | 0.00E+00 | 0.00E+00 | 0.00E+00 | 0.00E+00 | 0.00E+00 | 0.00E+00 | 0.00E+00 | 0.00E+00 | 0.00E+00 | 0.00E+00 | 0.00E+00 | 0.00E+00 | 0.00E+00 | 0.00E+00 | 0.00E+00 | 1.71E+06 | 1.07E+05 | 0.00E+00 | 2.14E+05 | 4.28E+05 | 0.00E+00 | 6.06E+05 | 3.34E-01 |
| O60502;O60502-3;O60502-4                                                  | 0.00E+00 | 0.00E+00 | 0.00E+00 | 0.00E+00 | 9.27E+06 | 0.00E+00 | 0.00E+00 | 0.00E+00 | 0.00E+00 | 0.00E+00 | 0.00E+00 | 0.00E+00 | 0.00E+00 | 0.00E+00 | 0.00E+00 | 0.00E+00 | 0.00E+00 | 5.79E+05 | 1.16E+06 | 0.00E+00 | 2.32E+06 | 3.28E+06 | 0.00E+00 | 3.34E-01 |          |
| O60884                                                                    | 0.00E+00 | 0.00E+00 | 0.00E+00 | 0.00E+00 | 0.00E+00 | 0.00E+00 | 0.00E+00 | 0.00E+00 | 0.00E+00 | 0.00E+00 | 0.00E+00 | 5.44E+05 | 0.00E+00 | 0.00E+00 | 0.00E+00 | 0.00E+00 | 0.00E+00 | 3.40E+04 | 0.00E+00 | 6.80E+04 | 1.36E+05 | 0.00E+00 | 1.92E+05 | 3.34E-01 |          |
| O75083;D6RD66;O75083-3                                                    | 0.00E+00 | 0.00E+00 | 0.00E+00 | 4.29E+06 | 0.00E+00 | 0.00E+00 | 0.00E+00 | 0.00E+00 | 0.00E+00 | 0.00E+00 | 0.00E+00 | 0.00E+00 | 0.00E+00 | 0.00E+00 | 0.00E+00 | 0.00E+00 | 0.00E+00 | 2.68E+05 | 5.37E+05 | 0.00E+00 | 1.07E+06 | 1.52E+06 | 0.00E+00 | 3.34E-01 |          |
| O75165                                                                    | 0.00E+00 | 0.00E+00 | 0.00E+00 | 0.00E+00 | 0.00E+00 | 0.00E+00 | 0.00E+00 | 0.00E+00 | 0.00E+00 | 0.00E+00 | 0.00E+00 | 0.00E+00 | 0.00E+00 | 0.00E+00 | 0.00E+00 | 0.00E+00 | 0.00E+00 | 3.23E+06 | 2.02E+05 | 0.00E+00 | 4.04E+05 | 8.07E+05 | 0.00E+00 | 1.14E+06 | 3.34E-01 |
| O75306-2;O75306                                                           | 0.00E+00 | 0.00E+00 | 0.00E+00 | 0.00E+00 | 6.45E+06 | 0.00E+00 | 0.00E+00 | 0.00E+00 | 0.00E+00 | 0.00E+00 | 0.00E+00 | 0.00E+00 | 0.00E+00 | 0.00E+00 | 0.00E+00 | 0.00E+00 | 0.00E+00 | 4.03E+05 | 8.06E+05 | 0.00E+00 | 1.61E+06 | 2.28E+06 | 0.00E+00 | 3.34E-01 |          |
| S4R3Q6;O75436-2;O75436                                                    | 0.00E+00 | 0.00E+00 | 0.00E+00 | 0.00E+00 | 0.00E+00 | 3.27E+06 | 0.00E+00 | 0.00E+00 | 0.00E+00 | 0.00E+00 | 0.00E+00 | 0.00E+00 | 0.00E+00 | 0.00E+00 | 0.00E+00 | 0.00E+00 | 0.00E+00 | 2.05E+05 | 4.09E+05 | 0.00E+00 | 8.19E+05 | 1.16E+06 | 0.00E+00 | 3.34E-01 |          |
| O75475                                                                    | 0.00E+00 | 0.00E+00 | 0.00E+00 | 0.00E+00 | 0.00E+00 | 0.00E+00 | 0.00E+00 | 0.00E+00 | 0.00E+00 | 0.00E+00 | 0.00E+00 | 0.00E+00 | 0.00E+00 | 2.01E+05 | 0.00E+00 | 0.00E+00 | 0.00E+00 | 1.26E+04 | 0.00E+00 | 2.52E+04 | 5.03E+04 | 0.00E+00 | 7.12E+04 | 3.34E-01 |          |
| O75477;BQQZ43                                                             | 0.00E+00 | 0.00E+00 | 0.00E+00 | 0.00E+00 | 0.00E+00 | 0.00E+00 | 0.00E+00 | 0.00E+00 | 0.00E+00 | 0.00E+00 | 0.00E+00 | 0.00E+00 | 0.00E+00 | 0.00E+00 | 0.00E+00 | 6.57E+05 | 0.00E+00 | 0.00E+00 | 4.11E+04 | 0.00E+00 | 8.22E+04 | 1.64E+05 | 0.00E+00 | 2.32E+05 | 3.34E-01 |
| O75844                                                                    | 0.00E+00 | 0.00E+00 | 0.00E+00 | 0.00E+00 | 0.00E+00 | 0.00E+00 | 0.00E+00 | 0.00E+00 | 0.00E+00 | 0.00E+00 | 0.00E+00 | 0.00E+00 | 0.00E+00 | 0.00E+00 | 0.00E+00 | 0.00E+00 | 0.00E+00 | 7.34E+05 | 4.59E+04 | 0.00E+00 | 9.18E+04 | 1.84E+05 | 0.00E+00 | 2.60E+05 | 3.34E-01 |
| O75874                                                                    | 0.00E+00 | 0.00E+00 | 0.00E+00 | 0.00E+00 | 0.00E+00 | 0.00E+00 | 1.00E+08 | 0.00E+00 | 0.00E+00 | 0.00E+00 | 0.00E+00 | 0.00E+00 | 0.00E+00 | 0.00E+00 | 0.00E+00 | 0.00E+00 | 0.00E+00 | 6.25E+06 | 1.25E+07 | 0.00E+00 | 2.50E+07 | 3.53E+07 | 0.00E+00 | 3.34E-01 |          |
| O75891-2;O75891;O75891-3                                                  | 0.00E+00 | 0.00E+00 | 0.00E+00 | 0.00E+00 | 0.00E+00 | 0.00E+00 | 0.00E+00 | 0.00E+00 | 0.00E+00 | 0.00E+00 | 0.00E+00 | 0.00E+00 | 0.00E+00 | 6.37E+05 | 0.00E+00 | 0.00E+00 | 0.00E+00 | 3.98E+04 | 0.00E+00 | 7.96E+04 | 1.59E+05 | 0.00E+00 | 2.25E+05 | 3.34E-01 |          |
| O76013-2;O76013;O76015                                                    | 0.00E+00 | 0.00E+00 | 0.00E+00 | 0.00E+00 | 0.00E+00 | 1.88E+06 | 0.00E+00 | 0.00E+00 | 0.00E+00 | 0.00E+00 | 0.00E+00 | 0.00E+00 | 0.00E+00 | 0.00E+00 | 0.00E+00 | 0.00E+00 | 0.00E+00 | 1.17E+05 | 2.34E+05 | 0.00E+00 | 4.69E+05 | 6.63E+05 | 0.00E+00 | 3.34E-01 |          |
| O76094-2;O76094;R4GNC1;D6RDY6                                             | 3.69E+06 | 0.00E+00 | 0.00E+00 | 0.00E+00 | 0.00E+00 | 0.00E+00 | 0.00E+00 | 0.00E+00 | 0.00E+00 | 0.00E+00 | 0.00E+00 | 0.00E+00 | 0.00E+00 | 0.00E+00 | 0.00E+00 | 0.00E+00 | 0.00E+00 | 2.31E+05 | 4.62E+05 | 0.00E+00 | 9.23E+05 | 1.31E+06 | 0.00E+00 | 3.34E-01 |          |
| O94776                                                                    | 0.00E+00 | 0.00E+00 | 0.00E+00 | 0.00E+00 | 0.00E+00 | 0.00E+00 | 1.55E+07 | 0.00E+00 | 0.00E+00 | 0.00E+00 | 0.00E+00 | 0.00E+00 | 0.00E+00 | 0.00E+00 | 0.00E+00 | 0.00E+00 | 0.00E+00 | 9.66E+05 | 1.93E+06 | 0.00E+00 | 3.86E+06 | 5.46E+06 | 0.00E+00 | 3.34E-01 |          |
| O94874-3;O94874-2;O94874                                                  | 0.00E+00 | 0.00E+00 | 0.00E+00 | 0.00E+00 | 0.00E+00 | 0.00E+00 | 7.89E+05 | 0.00E+00 | 0.00E+00 | 0.00E+00 | 0.00E+00 | 0.00E+00 | 0.00E+00 | 0.00E+00 | 0.00E+00 | 0.00E+00 | 0.00E+00 | 4.93E+04 | 9.86E+04 | 0.00E+00 | 1.97E+05 | 2.79E+05 | 0.00E+00 | 3.34E-01 |          |
| O94973-3;O94973;O94973-2;O95782-2;O95782                                  | 0.00E+00 | 0.00E+00 | 0.00E+00 | 0.00E+00 | 0.00E+00 | 0.00E+00 | 0.00E+00 | 0.00E+00 | 0.00E+00 | 0.00E+00 | 0.00E+00 | 0.00E+00 | 0.00E+00 | 0.00E+00 | 0.00E+00 | 0.00E+00 | 0.00E+00 | 2.48E+06 | 1.55E+05 | 0.00E+00 | 3.10E+05 | 6.20E+05 | 0.00E+00 | 8.77E+05 | 3.34E-01 |
| O95147                                                                    | 0.00E+00 | 0.00E+00 | 0.00E+00 | 0.00E+00 | 0.00E+00 | 1.76E+06 | 0.00E+00 | 0.00E+00 | 0.00E+00 | 0.00E+00 | 0.00E+00 | 0.00E+00 | 0.00E+00 | 0.00E+00 | 0.00E+00 | 0.00E+00 | 0.00E+00 | 1.10E+05 | 2.20E+05 | 0.00E+00 | 4.40E+05 | 6.23E+05 | 0.00E+00 | 3.34E-01 |          |
| O95347-2;O95347                                                           | 0.00E+00 | 0.00E+00 | 0.00E+00 | 0.00E+00 | 0.00E+00 | 0.00E+00 | 0.00E+00 | 0.00E+00 | 0.00E+00 | 0.00E+00 | 0.00E+00 | 0.00E+00 | 0.00E+00 | 0.00E+00 | 0.00E+00 | 0.00E+00 | 0.00E+00 | 2.79E+05 | 1.74E+04 | 0.00E+00 | 3.49E+04 | 6.97E+04 | 0.00E+00 | 9.86E+04 | 3.34E-01 |
| O95573                                                                    | 0.00E+00 | 0.00E+00 | 0.00E+00 | 0.00E+00 | 0.00E+00 | 0.00E+00 | 1.41E+06 | 0.00E+00 | 0.00E+00 | 0.00E+00 | 0.00E+00 | 0.00E+00 | 0.00E+00 | 0.00E+00 | 0.00E+00 | 0.00E+00 | 0.00E+00 | 8.84E+04 | 1.77E+05 | 0.00E+00 | 3.54E+05 | 5.00E+05 | 0.00E+00 | 3.34E-01 |          |
| O95671-3;O95671-2;O95671                                                  | 0.00E+00 | 0.00E+00 | 0.00E+00 | 0.00E+00 | 0.00E+00 | 0.00E+00 | 0.00E+00 | 0.00E+00 | 0.00E+00 | 0.00E+00 | 0.00E+00 | 0.00E+00 | 0.00E+00 | 3.32E+05 | 0.00E+00 | 0.00E+00 | 0.00E+00 | 2.08E+04 | 0.00E+00 | 4.15E+04 | 8.31E+04 | 0.00E+00 | 1.17E+05 | 3.34E-01 |          |
| O95678                                                                    | 0.00E+00 | 0.00E+00 | 0.00E+00 | 0.00E+00 | 0.00E+00 | 0.00E+00 | 0.00E+00 | 0.00E+00 | 0.00E+00 | 0.00E+00 | 0.00E+00 | 0.00E+00 | 0.00E+00 | 0.00E+00 | 0.00E+00 | 0.00E+00 | 0.00E+00 | 1.88E+05 | 0.00E+00 | 3.77E+05 | 7.53E+05 | 0.00E+00 | 1.07E+06 | 3.34E-01 |          |
| O95716                                                                    | 0.00E+00 | 0.00E+00 | 0.00E+00 | 0.00E+00 | 0.00E+00 | 1.80E+06 | 0.00E+00 | 0.00E+00 | 0.00E+00 | 0.00E+00 | 0.00E+00 | 0.00E+00 | 0.00E+00 | 0.00E+00 | 0.00E+00 | 0.00E+00 | 0.00E+00 | 1.12E+05 | 2.25E+05 | 0.00E+00 | 4.50E+05 | 6.36E+05 | 0.00E+00 | 3.34E-01 |          |
| O96019-2;O96019                                                           | 0.00E+00 | 0.00E+00 | 0.00E+00 | 0.00E+00 | 0.00E+00 | 0.00E+00 | 0.00E+00 | 0.00E+00 | 0.00E+00 | 0.00E+00 | 0.00E+00 | 0.00E+00 | 0.00E+00 | 0.00E+00 | 0.00E+00 | 0.00E+00 | 5.33E+06 | 0.00E+00 | 3.33E+05 | 0.00E+00 | 6.66E+05 | 1.33E+06 | 0.00E+00 | 1.88E+06 | 3.34E-01 |
| P00403                                                                    | 0.00E+00 | 0.00E+00 | 0.00E+00 | 0.00E+00 | 0.00E+00 | 5.94E+06 | 0.00E+00 | 0.00E+00 | 0.00E+00 | 0.00E+00 | 0.00E+00 | 0.00E+00 | 0.00E+00 | 0.00E+00 | 0.00E+00 | 0.00E+00 | 0.00E+00 | 3.71E+05 | 7.42E+05 | 0.00E+00 | 1.48E+06 | 2.10E+06 | 0.00E+00 | 3.34E-01 |          |
| P00846                                                                    | 0.00E+00 | 0.00E+00 | 0.00E+00 | 0.00E+00 | 0.00E+00 | 0.00E+00 | 0.00E+00 | 0.00E+00 | 0.00E+00 | 0.00E+00 | 0.00E+00 | 0.00E+00 | 0.00E+00 | 0.00E+00 | 0.00E+00 | 0.00E+00 | 0.00E+00 | 3.59E+06 | 2.24E+05 | 0.00E+00 | 4.48E+05 | 8.96E+05 | 0.00E+00 | 1.27E+06 | 3.34E-01 |
| Q5H9A7;P01033                                                             | 0.00E+00 | 0.00E+00 | 4.08E+05 | 0.00E+00 | 0.00E+00 | 0.00E+00 | 0.00E+00 | 0.00E+00 | 0.00E+00 | 0.00E+00 | 0.00E+00 | 0.00E+00 | 0.00E+00 | 0.00E+00 | 0.00E+00 | 0.00E+00 | 0.00E+00 | 2.55E+04 | 5.10E+04 | 0.00E+00 | 1.02E+05 | 1.44E+05 | 0.00E+00 | 3.34E-01 |          |
| P02545-2;Q3BDU5;Q5TCI8                                                    | 0.00E+00 | 0.00E+00 | 0.00E+00 | 0.00E+00 | 0.00E+00 | 1.55E+07 | 0.00E+00 | 0.00E+00 | 0.00E+00 | 0.00E+00 | 0.00E+00 | 0.00E+00 | 0.00E+00 | 0.00E+00 | 0.00E+00 | 0.00E+00 | 0.00E+00 | 9.71E+05 | 1.94E+06 | 0.00E+00 | 3.88E+06 | 5.49E+06 | 0.00E+00 | 3.34E-01 |          |

|                                                            |          |          |          |          |          |          |          |          |          |          |          |          |          |          |          |          |          |          |          |          |          |          |          |          |          |          |
|------------------------------------------------------------|----------|----------|----------|----------|----------|----------|----------|----------|----------|----------|----------|----------|----------|----------|----------|----------|----------|----------|----------|----------|----------|----------|----------|----------|----------|----------|
| P04040                                                     | 0.00E+00 | 0.00E+00 | 0.00E+00 | 0.00E+00 | 0.00E+00 | 0.00E+00 | 0.00E+00 | 0.00E+00 | 0.00E+00 | 0.00E+00 | 0.00E+00 | 0.00E+00 | 0.00E+00 | 0.00E+00 | 1.32E+06 | 0.00E+00 | 0.00E+00 | 0.00E+00 | 0.00E+00 | 8.23E+04 | 0.00E+00 | 1.65E+05 | 3.29E+05 | 0.00E+00 | 4.66E+05 | 3.34E-01 |
| P04350                                                     | 0.00E+00 | 0.00E+00 | 0.00E+00 | 0.00E+00 | 0.00E+00 | 0.00E+00 | 0.00E+00 | 0.00E+00 | 0.00E+00 | 0.00E+00 | 0.00E+00 | 0.00E+00 | 0.00E+00 | 0.00E+00 | 0.00E+00 | 0.00E+00 | 2.02E+06 | 0.00E+00 | 1.26E+05 | 0.00E+00 | 2.53E+05 | 5.06E+05 | 0.00E+00 | 7.15E+05 | 3.34E-01 |          |
| P04818-2;P04818-3                                          | 0.00E+00 | 0.00E+00 | 0.00E+00 | 0.00E+00 | 0.00E+00 | 4.14E+05 | 0.00E+00 | 0.00E+00 | 0.00E+00 | 0.00E+00 | 0.00E+00 | 0.00E+00 | 0.00E+00 | 0.00E+00 | 0.00E+00 | 0.00E+00 | 0.00E+00 | 0.00E+00 | 2.59E+04 | 5.18E+04 | 0.00E+00 | 1.04E+05 | 1.46E+05 | 0.00E+00 | 3.34E-01 |          |
| P04899;P04899-4;P04899-6;P04899-3;P04899-5;P04899-2;P63096 | 0.00E+00 | 0.00E+00 | 0.00E+00 | 0.00E+00 | 0.00E+00 | 0.00E+00 | 0.00E+00 | 0.00E+00 | 0.00E+00 | 0.00E+00 | 0.00E+00 | 0.00E+00 | 9.89E+05 | 0.00E+00 | 0.00E+00 | 0.00E+00 | 0.00E+00 | 0.00E+00 | 6.18E+04 | 0.00E+00 | 1.24E+05 | 2.47E+05 | 0.00E+00 | 3.50E+05 | 3.34E-01 |          |
| S4R3S4;P05091-2;P05091                                     | 0.00E+00 | 0.00E+00 | 0.00E+00 | 0.00E+00 | 0.00E+00 | 0.00E+00 | 0.00E+00 | 0.00E+00 | 0.00E+00 | 0.00E+00 | 0.00E+00 | 0.00E+00 | 0.00E+00 | 0.00E+00 | 1.67E+06 | 0.00E+00 | 0.00E+00 | 0.00E+00 | 1.04E+05 | 0.00E+00 | 2.08E+05 | 4.17E+05 | 0.00E+00 | 5.89E+05 | 3.34E-01 |          |
| P06702                                                     | 0.00E+00 | 0.00E+00 | 0.00E+00 | 0.00E+00 | 0.00E+00 | 0.00E+00 | 0.00E+00 | 0.00E+00 | 0.00E+00 | 0.00E+00 | 0.00E+00 | 0.00E+00 | 6.67E+06 | 0.00E+00 | 0.00E+00 | 0.00E+00 | 0.00E+00 | 0.00E+00 | 4.17E+05 | 0.00E+00 | 8.34E+05 | 1.67E+06 | 0.00E+00 | 2.36E+06 | 3.34E-01 |          |
| P06756-3;P06756-2;P06756                                   | 0.00E+00 | 0.00E+00 | 0.00E+00 | 0.00E+00 | 0.00E+00 | 0.00E+00 | 0.00E+00 | 0.00E+00 | 0.00E+00 | 0.00E+00 | 0.00E+00 | 0.00E+00 | 0.00E+00 | 0.00E+00 | 6.23E+05 | 0.00E+00 | 0.00E+00 | 0.00E+00 | 3.89E+04 | 0.00E+00 | 7.78E+04 | 1.56E+05 | 0.00E+00 | 2.20E+05 | 3.34E-01 |          |
| P07858                                                     | 0.00E+00 | 0.00E+00 | 7.78E+05 | 0.00E+00 | 0.00E+00 | 0.00E+00 | 0.00E+00 | 0.00E+00 | 0.00E+00 | 0.00E+00 | 0.00E+00 | 0.00E+00 | 0.00E+00 | 0.00E+00 | 0.00E+00 | 0.00E+00 | 0.00E+00 | 0.00E+00 | 4.86E+04 | 9.72E+04 | 0.00E+00 | 1.94E+05 | 2.75E+05 | 0.00E+00 | 3.34E-01 |          |
| Q5TCU3;P07951-2;P07951-3;P07951;Q5TCU8                     | 0.00E+00 | 0.00E+00 | 0.00E+00 | 0.00E+00 | 0.00E+00 | 0.00E+00 | 0.00E+00 | 0.00E+00 | 0.00E+00 | 0.00E+00 | 0.00E+00 | 0.00E+00 | 4.91E+05 | 0.00E+00 | 0.00E+00 | 0.00E+00 | 0.00E+00 | 0.00E+00 | 3.07E+04 | 0.00E+00 | 6.14E+04 | 1.23E+05 | 0.00E+00 | 1.74E+05 | 3.34E-01 |          |
| P08243-3;P08243-2;P08243                                   | 0.00E+00 | 0.00E+00 | 0.00E+00 | 0.00E+00 | 0.00E+00 | 0.00E+00 | 0.00E+00 | 0.00E+00 | 0.00E+00 | 0.00E+00 | 0.00E+00 | 0.00E+00 | 0.00E+00 | 0.00E+00 | 0.00E+00 | 0.00E+00 | 0.00E+00 | 1.81E+06 | 1.13E+05 | 0.00E+00 | 2.27E+05 | 4.54E+05 | 0.00E+00 | 6.41E+05 | 3.34E-01 |          |
| P08473                                                     | 0.00E+00 | 0.00E+00 | 0.00E+00 | 0.00E+00 | 0.00E+00 | 8.50E+07 | 0.00E+00 | 0.00E+00 | 0.00E+00 | 0.00E+00 | 0.00E+00 | 0.00E+00 | 0.00E+00 | 0.00E+00 | 0.00E+00 | 0.00E+00 | 0.00E+00 | 0.00E+00 | 5.31E+06 | 1.06E+07 | 0.00E+00 | 2.13E+07 | 3.01E+07 | 0.00E+00 | 3.34E-01 |          |
| P08754                                                     | 0.00E+00 | 0.00E+00 | 0.00E+00 | 0.00E+00 | 0.00E+00 | 0.00E+00 | 0.00E+00 | 0.00E+00 | 0.00E+00 | 0.00E+00 | 0.00E+00 | 0.00E+00 | 0.00E+00 | 0.00E+00 | 0.00E+00 | 0.00E+00 | 0.00E+00 | 0.00E+00 | 2.90E+06 | 1.81E+05 | 0.00E+00 | 3.63E+05 | 7.25E+05 | 0.00E+00 | 1.03E+06 | 3.34E-01 |
| P09104-2;P09104;F5H0C8                                     | 0.00E+00 | 0.00E+00 | 0.00E+00 | 0.00E+00 | 0.00E+00 | 0.00E+00 | 0.00E+00 | 0.00E+00 | 0.00E+00 | 0.00E+00 | 0.00E+00 | 0.00E+00 | 0.00E+00 | 0.00E+00 | 0.00E+00 | 0.00E+00 | 0.00E+00 | 5.30E+06 | 0.00E+00 | 3.32E+05 | 0.00E+00 | 6.63E+05 | 1.33E+06 | 0.00E+00 | 1.88E+06 | 3.34E-01 |
| Q5T7C4;Q5T7C6;P09429                                       | 0.00E+00 | 0.00E+00 | 0.00E+00 | 0.00E+00 | 0.00E+00 | 0.00E+00 | 0.00E+00 | 0.00E+00 | 0.00E+00 | 0.00E+00 | 0.00E+00 | 0.00E+00 | 0.00E+00 | 0.00E+00 | 3.37E+07 | 0.00E+00 | 0.00E+00 | 0.00E+00 | 2.11E+06 | 0.00E+00 | 4.21E+06 | 8.42E+06 | 0.00E+00 | 1.19E+07 | 3.34E-01 |          |
| P09471-2;P09471;H3BQG8;H3BTM2;H3BN82                       | 0.00E+00 | 0.00E+00 | 0.00E+00 | 0.00E+00 | 0.00E+00 | 0.00E+00 | 8.28E+06 | 0.00E+00 | 0.00E+00 | 0.00E+00 | 0.00E+00 | 0.00E+00 | 0.00E+00 | 0.00E+00 | 0.00E+00 | 0.00E+00 | 0.00E+00 | 0.00E+00 | 5.18E+05 | 1.04E+06 | 0.00E+00 | 2.07E+06 | 2.93E+06 | 0.00E+00 | 3.34E-01 |          |
| P09525;Q6P452;P09525-2                                     | 0.00E+00 | 0.00E+00 | 0.00E+00 | 0.00E+00 | 0.00E+00 | 0.00E+00 | 0.00E+00 | 0.00E+00 | 0.00E+00 | 1.63E+06 | 0.00E+00 | 0.00E+00 | 0.00E+00 | 0.00E+00 | 0.00E+00 | 0.00E+00 | 0.00E+00 | 0.00E+00 | 1.02E+05 | 0.00E+00 | 2.04E+05 | 4.09E+05 | 0.00E+00 | 5.78E+05 | 3.34E-01 |          |
| P09972;K7EKH5;C9J8F3;J3KSV6;J3QKP5;ABMVZ9                  | 0.00E+00 | 0.00E+00 | 2.69E+06 | 0.00E+00 | 0.00E+00 | 0.00E+00 | 0.00E+00 | 0.00E+00 | 0.00E+00 | 0.00E+00 | 0.00E+00 | 0.00E+00 | 0.00E+00 | 0.00E+00 | 0.00E+00 | 0.00E+00 | 0.00E+00 | 0.00E+00 | 1.68E+05 | 3.36E+05 | 0.00E+00 | 6.71E+05 | 9.50E+05 | 0.00E+00 | 3.34E-01 |          |
| P10155-2;P10155-3;P10155-5;P10155-4;P10155                 | 0.00E+00 | 0.00E+00 | 0.00E+00 | 0.00E+00 | 0.00E+00 | 0.00E+00 | 0.00E+00 | 0.00E+00 | 0.00E+00 | 0.00E+00 | 0.00E+00 | 0.00E+00 | 0.00E+00 | 9.25E+05 | 0.00E+00 | 0.00E+00 | 0.00E+00 | 0.00E+00 | 5.78E+04 | 0.00E+00 | 1.16E+05 | 2.31E+05 | 0.00E+00 | 3.27E+05 | 3.34E-01 |          |
| P10253                                                     | 0.00E+00 | 0.00E+00 | 0.00E+00 | 0.00E+00 | 0.00E+00 | 4.06E+07 | 0.00E+00 | 0.00E+00 | 0.00E+00 | 0.00E+00 | 0.00E+00 | 0.00E+00 | 0.00E+00 | 0.00E+00 | 0.00E+00 | 0.00E+00 | 0.00E+00 | 0.00E+00 | 2.54E+06 | 5.08E+06 | 0.00E+00 | 1.02E+07 | 1.44E+07 | 0.00E+00 | 3.34E-01 |          |
| P10301                                                     | 0.00E+00 | 0.00E+00 | 0.00E+00 | 0.00E+00 | 0.00E+00 | 0.00E+00 | 0.00E+00 | 0.00E+00 | 0.00E+00 | 0.00E+00 | 0.00E+00 | 0.00E+00 | 0.00E+00 | 2.86E+06 | 0.00E+00 | 0.00E+00 | 0.00E+00 | 0.00E+00 | 1.79E+05 | 0.00E+00 | 3.58E+05 | 7.16E+05 | 0.00E+00 | 1.01E+06 | 3.34E-01 |          |
| P10523                                                     | 0.00E+00 | 0.00E+00 | 0.00E+00 | 0.00E+00 | 0.00E+00 | 0.00E+00 | 0.00E+00 | 0.00E+00 | 0.00E+00 | 0.00E+00 | 0.00E+00 | 0.00E+00 | 0.00E+00 | 0.00E+00 | 0.00E+00 | 0.00E+00 | 0.00E+00 | 1.97E+06 | 1.23E+05 | 0.00E+00 | 2.46E+05 | 4.93E+05 | 0.00E+00 | 6.97E+05 | 3.34E-01 |          |
| P11172-2;P11172-3;P11172                                   | 0.00E+00 | 0.00E+00 | 0.00E+00 | 0.00E+00 | 0.00E+00 | 0.00E+00 | 8.51E+06 | 0.00E+00 | 0.00E+00 | 0.00E+00 | 0.00E+00 | 0.00E+00 | 0.00E+00 | 0.00E+00 | 0.00E+00 | 0.00E+00 | 0.00E+00 | 0.00E+00 | 5.32E+05 | 1.06E+06 | 0.00E+00 | 2.13E+06 | 3.01E+06 | 0.00E+00 | 3.34E-01 |          |
| P11233;H7C3P7                                              | 0.00E+00 | 0.00E+00 | 0.00E+00 | 0.00E+00 | 6.77E+06 | 0.00E+00 | 0.00E+00 | 0.00E+00 | 0.00E+00 | 0.00E+00 | 0.00E+00 | 0.00E+00 | 0.00E+00 | 0.00E+00 | 0.00E+00 | 0.00E+00 | 0.00E+00 | 0.00E+00 | 4.23E+05 | 8.46E+05 | 0.00E+00 | 1.69E+06 | 2.39E+06 | 0.00E+00 | 3.34E-01 |          |
| P11279                                                     | 0.00E+00 | 0.00E+00 | 0.00E+00 | 0.00E+00 | 0.00E+00 | 0.00E+00 | 0.00E+00 | 0.00E+00 | 0.00E+00 | 0.00E+00 | 0.00E+00 | 0.00E+00 | 0.00E+00 | 0.00E+00 | 0.00E+00 | 0.00E+00 | 0.00E+00 | 6.66E+07 | 0.00E+00 | 4.16E+06 | 0.00E+00 | 8.33E+06 | 1.67E+07 | 0.00E+00 | 2.36E+07 | 3.34E-01 |
| P11413;P11413-2;E7EM57;E7EUI8;P11413-3;E9PD92              | 0.00E+00 | 0.00E+00 | 0.00E+00 | 0.00E+00 | 0.00E+00 | 0.00E+00 | 0.00E+00 | 0.00E+00 | 0.00E+00 | 0.00E+00 | 0.00E+00 | 0.00E+00 | 0.00E+00 | 0.00E+00 | 0.00E+00 | 0.00E+00 | 0.00E+00 | 3.42E+06 | 0.00E+00 | 2.13E+05 | 0.00E+00 | 4.27E+05 | 8.54E+05 | 0.00E+00 | 1.21E+06 | 3.34E-01 |
| P11488;C9JCV8;P19087;A8MTJ3                                | 0.00E+00 | 0.00E+00 | 0.00E+00 | 0.00E+00 | 0.00E+00 | 4.23E+06 | 0.00E+00 | 0.00E+00 | 0.00E+00 | 0.00E+00 | 0.00E+00 | 0.00E+00 | 0.00E+00 | 0.00E+00 | 0.00E+00 | 0.00E+00 | 0.00E+00 | 0.00E+00 | 2.64E+05 | 5.29E+05 | 0.00E+00 | 1.06E+06 | 1.50E+06 | 0.00E+00 | 3.34E-01 |          |
| P11498;E9PRE7;P11498-2                                     | 0.00E+00 | 0.00E+00 | 0.00E+00 | 0.00E+00 | 0.00E+00 | 0.00E+00 | 0.00E+00 | 0.00E+00 | 0.00E+00 | 0.00E+00 | 0.00E+00 | 0.00E+00 | 0.00E+00 | 6.98E+07 | 0.00E+00 | 0.00E+00 | 0.00E+00 | 0.00E+00 | 4.36E+06 | 0.00E+00 | 8.72E+06 | 1.74E+07 | 0.00E+00 | 2.47E+07 | 3.34E-01 |          |
| P11717                                                     | 0.00E+00 | 0.00E+00 | 0.00E+00 | 0.00E+00 | 0.00E+00 | 0.00E+00 | 1.55E+07 | 0.00E+00 | 0.00E+00 | 0.00E+00 | 0.00E+00 | 0.00E+00 | 0.00E+00 | 0.00E+00 | 0.00E+00 | 0.00E+00 | 0.00E+00 | 0.00E+00 | 9.68E+05 | 1.94E+06 | 0.00E+00 | 3.87E+06 | 5.48E+06 | 0.00E+00 | 3.34E-01 |          |
| P12277;H0YJG0                                              | 0.00E+00 | 0.00E+00 | 0.00E+00 | 0.00E+00 | 0.00E+00 | 0.00E+00 | 0.00E+00 | 0.00E+00 | 0.00E+00 | 0.00E+00 | 0.00E+00 | 0.00E+00 | 0.00E+00 | 1.03E+07 | 0.00E+00 | 0.00E+00 | 0.00E+00 | 0.00E+00 | 6.45E+05 | 0.00E+00 | 1.29E+06 | 2.58E+06 | 0.00E+00 | 3.65E+06 | 3.34E-01 |          |
| P13473-2;P13473;P13473-3                                   | 0.00E+00 | 0.00E+00 | 0.00E+00 | 0.00E+00 | 0.00E+00 | 0.00E+00 | 0.00E+00 | 0.00E+00 | 0.00E+00 | 0.00E+00 | 0.00E+00 | 3.56E+05 | 0.00E+00 | 0.00E+00 | 0.00E+00 | 0.00E+00 | 0.00E+00 | 0.00E+00 | 2.22E+04 | 0.00E+00 | 4.45E+04 | 8.90E+04 | 0.00E+00 | 1.26E+05 | 3.34E-01 |          |
| P13693;Q5W0H4;J3KPG2;E9PJF7                                | 0.00E+00 | 0.00E+00 | 0.00E+00 | 0.00E+00 | 0.00E+00 | 2.22E+06 | 0.00E+00 | 0.00E+00 | 0.00E+00 | 0.00E+00 | 0.00E+00 | 0.00E+00 | 0.00E+00 | 0.00E+00 | 0.00E+00 | 0.00E+00 | 0.00E+00 | 0.00E+00 | 1.39E+05 | 2.77E+05 | 0.00E+00 | 5.54E+05 | 7.84E+05 | 0.00E+00 | 3.34E-01 |          |
| P13861-2;P13861;C9J830;H7C1L0                              | 0.00E+00 | 0.00E+00 | 0.00E+00 | 0.00E+00 | 0.00E+00 | 0.00E+00 | 0.00E+00 | 0.00E+00 | 0.00E+00 | 0.00E+00 | 0.00E+00 | 0.00E+00 | 0.00E+00 | 0.00E+00 | 0.00E+00 | 0.00E+00 | 0.00E+00 | 0.00E+00 | 6.62E+05 | 4.14E+04 | 0.00E+00 | 8.28E+04 | 1.66E+05 | 0.00E+00 | 2.34E+05 | 3.34E-01 |
| P14136-3;P14136;P14136-2;K7ELP4;K7EJU1;K7EKH9              | 0.00E+00 | 0.00E+00 | 0.00E+00 | 0.00E+00 | 0.00E+00 | 0.00E+00 | 0.00E+00 | 0.00E+00 | 0.00E+00 | 0.00E+00 | 0.00E+00 | 0.00E+00 | 0.00E+00 | 0.00E+00 | 0.00E+00 | 0.00E+00 | 0.00E+00 | 0.00E+00 | 2.46E+05 | 1.54E+04 | 0.00E+00 | 3.08E+04 | 6.15E+04 | 0.00E+00 | 8.70E+04 | 3.34E-01 |

|                                                                                                                                                           |          |          |          |          |          |          |          |          |          |          |          |          |          |          |          |          |          |          |          |          |          |          |          |          |          |
|-----------------------------------------------------------------------------------------------------------------------------------------------------------|----------|----------|----------|----------|----------|----------|----------|----------|----------|----------|----------|----------|----------|----------|----------|----------|----------|----------|----------|----------|----------|----------|----------|----------|----------|
| P15121;E9PCX2                                                                                                                                             | 0.00E+00 | 0.00E+00 | 0.00E+00 | 0.00E+00 | 0.00E+00 | 0.00E+00 | 0.00E+00 | 0.00E+00 | 0.00E+00 | 0.00E+00 | 0.00E+00 | 0.00E+00 | 0.00E+00 | 0.00E+00 | 0.00E+00 | 0.00E+00 | 1.17E+06 | 7.32E+04 | 0.00E+00 | 1.46E+05 | 2.93E+05 | 0.00E+00 | 4.14E+05 | 3.34E-01 |          |
| P17066;P48741                                                                                                                                             | 0.00E+00 | 0.00E+00 | 0.00E+00 | 0.00E+00 | 0.00E+00 | 2.55E+07 | 0.00E+00 | 0.00E+00 | 0.00E+00 | 0.00E+00 | 0.00E+00 | 0.00E+00 | 0.00E+00 | 0.00E+00 | 0.00E+00 | 0.00E+00 | 0.00E+00 | 1.59E+06 | 3.18E+06 | 0.00E+00 | 6.36E+06 | 9.00E+06 | 0.00E+00 | 3.34E-01 |          |
| P17655-2;P17655                                                                                                                                           | 0.00E+00 | 0.00E+00 | 0.00E+00 | 0.00E+00 | 0.00E+00 | 0.00E+00 | 0.00E+00 | 0.00E+00 | 0.00E+00 | 0.00E+00 | 0.00E+00 | 0.00E+00 | 3.59E+05 | 0.00E+00 | 0.00E+00 | 0.00E+00 | 0.00E+00 | 2.24E+04 | 0.00E+00 | 4.49E+04 | 8.98E+04 | 0.00E+00 | 1.27E+05 | 3.34E-01 |          |
| P19013                                                                                                                                                    | 0.00E+00 | 0.00E+00 | 0.00E+00 | 0.00E+00 | 0.00E+00 | 0.00E+00 | 1.91E+05 | 0.00E+00 | 0.00E+00 | 0.00E+00 | 0.00E+00 | 0.00E+00 | 0.00E+00 | 0.00E+00 | 0.00E+00 | 0.00E+00 | 0.00E+00 | 1.19E+04 | 2.39E+04 | 0.00E+00 | 4.77E+04 | 6.75E+04 | 0.00E+00 | 3.34E-01 |          |
| P20042                                                                                                                                                    | 0.00E+00 | 0.00E+00 | 0.00E+00 | 0.00E+00 | 0.00E+00 | 0.00E+00 | 2.19E+06 | 0.00E+00 | 0.00E+00 | 0.00E+00 | 0.00E+00 | 0.00E+00 | 0.00E+00 | 0.00E+00 | 0.00E+00 | 0.00E+00 | 0.00E+00 | 1.37E+05 | 2.74E+05 | 0.00E+00 | 5.49E+05 | 7.76E+05 | 0.00E+00 | 3.34E-01 |          |
| P20339-2;P20339                                                                                                                                           | 0.00E+00 | 0.00E+00 | 0.00E+00 | 0.00E+00 | 0.00E+00 | 0.00E+00 | 0.00E+00 | 0.00E+00 | 0.00E+00 | 0.00E+00 | 0.00E+00 | 0.00E+00 | 2.60E+05 | 0.00E+00 | 0.00E+00 | 0.00E+00 | 0.00E+00 | 1.62E+04 | 0.00E+00 | 3.25E+04 | 6.49E+04 | 0.00E+00 | 9.18E+04 | 3.34E-01 |          |
| P21266;A0A0A0MTN3                                                                                                                                         | 0.00E+00 | 0.00E+00 | 0.00E+00 | 0.00E+00 | 0.00E+00 | 0.00E+00 | 0.00E+00 | 0.00E+00 | 0.00E+00 | 0.00E+00 | 0.00E+00 | 0.00E+00 | 0.00E+00 | 0.00E+00 | 1.49E+06 | 0.00E+00 | 0.00E+00 | 9.28E+04 | 0.00E+00 | 1.86E+05 | 3.71E+05 | 0.00E+00 | 5.25E+05 | 3.34E-01 |          |
| P21953;P21953-2                                                                                                                                           | 0.00E+00 | 0.00E+00 | 0.00E+00 | 0.00E+00 | 0.00E+00 | 0.00E+00 | 3.16E+06 | 0.00E+00 | 0.00E+00 | 0.00E+00 | 0.00E+00 | 0.00E+00 | 0.00E+00 | 0.00E+00 | 0.00E+00 | 0.00E+00 | 0.00E+00 | 1.98E+05 | 3.95E+05 | 0.00E+00 | 7.91E+05 | 1.12E+06 | 0.00E+00 | 3.34E-01 |          |
| P22033                                                                                                                                                    | 0.00E+00 | 0.00E+00 | 0.00E+00 | 0.00E+00 | 0.00E+00 | 0.00E+00 | 0.00E+00 | 0.00E+00 | 0.00E+00 | 0.00E+00 | 0.00E+00 | 0.00E+00 | 0.00E+00 | 0.00E+00 | 0.00E+00 | 8.03E+06 | 0.00E+00 | 5.02E+05 | 0.00E+00 | 1.00E+06 | 2.01E+06 | 0.00E+00 | 2.84E+06 | 3.34E-01 |          |
| P28070                                                                                                                                                    | 0.00E+00 | 0.00E+00 | 0.00E+00 | 0.00E+00 | 0.00E+00 | 0.00E+00 | 0.00E+00 | 0.00E+00 | 0.00E+00 | 0.00E+00 | 0.00E+00 | 0.00E+00 | 0.00E+00 | 0.00E+00 | 0.00E+00 | 0.00E+00 | 3.67E+05 | 2.29E+04 | 0.00E+00 | 4.58E+04 | 9.17E+04 | 0.00E+00 | 1.30E+05 | 3.34E-01 |          |
| P28072;A0A087X2I4                                                                                                                                         | 0.00E+00 | 0.00E+00 | 0.00E+00 | 0.00E+00 | 0.00E+00 | 0.00E+00 | 0.00E+00 | 0.00E+00 | 0.00E+00 | 0.00E+00 | 0.00E+00 | 0.00E+00 | 4.15E+06 | 0.00E+00 | 0.00E+00 | 0.00E+00 | 0.00E+00 | 2.60E+05 | 0.00E+00 | 5.19E+05 | 1.04E+06 | 0.00E+00 | 1.47E+06 | 3.34E-01 |          |
| P28288-2;P28288                                                                                                                                           | 0.00E+00 | 0.00E+00 | 0.00E+00 | 0.00E+00 | 0.00E+00 | 0.00E+00 | 0.00E+00 | 1.85E+05 | 0.00E+00 | 0.00E+00 | 0.00E+00 | 0.00E+00 | 0.00E+00 | 0.00E+00 | 0.00E+00 | 0.00E+00 | 0.00E+00 | 1.15E+04 | 2.31E+04 | 0.00E+00 | 4.61E+04 | 6.52E+04 | 0.00E+00 | 3.34E-01 |          |
| P29317                                                                                                                                                    | 0.00E+00 | 0.00E+00 | 0.00E+00 | 0.00E+00 | 0.00E+00 | 0.00E+00 | 0.00E+00 | 0.00E+00 | 0.00E+00 | 0.00E+00 | 0.00E+00 | 2.98E+05 | 0.00E+00 | 0.00E+00 | 0.00E+00 | 0.00E+00 | 0.00E+00 | 1.86E+04 | 0.00E+00 | 3.73E+04 | 7.46E+04 | 0.00E+00 | 1.05E+05 | 3.34E-01 |          |
| P29992;K7EL62;A0A087W VZ3                                                                                                                                 | 0.00E+00 | 0.00E+00 | 0.00E+00 | 0.00E+00 | 0.00E+00 | 0.00E+00 | 0.00E+00 | 0.00E+00 | 0.00E+00 | 0.00E+00 | 0.00E+00 | 0.00E+00 | 0.00E+00 | 0.00E+00 | 0.00E+00 | 6.66E+05 | 0.00E+00 | 4.16E+04 | 0.00E+00 | 8.32E+04 | 1.66E+05 | 0.00E+00 | 2.35E+05 | 3.34E-01 |          |
| P30038-2;P30038-3;P30038                                                                                                                                  | 0.00E+00 | 0.00E+00 | 0.00E+00 | 0.00E+00 | 0.00E+00 | 0.00E+00 | 0.00E+00 | 0.00E+00 | 0.00E+00 | 0.00E+00 | 0.00E+00 | 0.00E+00 | 0.00E+00 | 0.00E+00 | 0.00E+00 | 0.00E+00 | 2.84E+06 | 1.78E+05 | 0.00E+00 | 3.55E+05 | 7.10E+05 | 0.00E+00 | 1.00E+06 | 3.34E-01 |          |
| P30419-2;P30419;K7EN82                                                                                                                                    | 0.00E+00 | 0.00E+00 | 0.00E+00 | 0.00E+00 | 0.00E+00 | 0.00E+00 | 0.00E+00 | 0.00E+00 | 0.00E+00 | 0.00E+00 | 0.00E+00 | 0.00E+00 | 0.00E+00 | 0.00E+00 | 2.76E+06 | 0.00E+00 | 0.00E+00 | 0.00E+00 | 1.73E+05 | 0.00E+00 | 3.45E+05 | 6.90E+05 | 0.00E+00 | 9.76E+05 | 3.34E-01 |
| Q29940;P30493;P30492;P30480;P30479;P30466;P30462;P30460;P18463;P30510;P30504;P30685;P30498;P30495;P30491;P30490;P30484;P30464;P18465;P18464;P10319;Q29865 | 0.00E+00 | 0.00E+00 | 0.00E+00 | 0.00E+00 | 2.76E+06 | 0.00E+00 | 0.00E+00 | 0.00E+00 | 0.00E+00 | 0.00E+00 | 0.00E+00 | 0.00E+00 | 0.00E+00 | 0.00E+00 | 0.00E+00 | 0.00E+00 | 0.00E+00 | 1.73E+05 | 3.45E+05 | 0.00E+00 | 6.90E+05 | 9.76E+05 | 0.00E+00 | 3.34E-01 |          |
| P30520                                                                                                                                                    | 0.00E+00 | 0.00E+00 | 0.00E+00 | 0.00E+00 | 0.00E+00 | 0.00E+00 | 0.00E+00 | 0.00E+00 | 0.00E+00 | 0.00E+00 | 0.00E+00 | 0.00E+00 | 1.31E+06 | 0.00E+00 | 0.00E+00 | 0.00E+00 | 0.00E+00 | 8.16E+04 | 0.00E+00 | 1.63E+05 | 3.26E+05 | 0.00E+00 | 4.61E+05 | 3.34E-01 |          |
| P30740-2;P30740                                                                                                                                           | 0.00E+00 | 0.00E+00 | 0.00E+00 | 0.00E+00 | 8.55E+05 | 0.00E+00 | 0.00E+00 | 0.00E+00 | 0.00E+00 | 0.00E+00 | 0.00E+00 | 0.00E+00 | 0.00E+00 | 0.00E+00 | 0.00E+00 | 0.00E+00 | 0.00E+00 | 5.34E+04 | 1.07E+05 | 0.00E+00 | 2.14E+05 | 3.02E+05 | 0.00E+00 | 3.34E-01 |          |
| P30837                                                                                                                                                    | 0.00E+00 | 0.00E+00 | 0.00E+00 | 0.00E+00 | 0.00E+00 | 0.00E+00 | 3.11E+05 | 0.00E+00 | 0.00E+00 | 0.00E+00 | 0.00E+00 | 0.00E+00 | 0.00E+00 | 0.00E+00 | 0.00E+00 | 0.00E+00 | 0.00E+00 | 1.94E+04 | 3.89E+04 | 0.00E+00 | 7.78E+04 | 1.10E+05 | 0.00E+00 | 3.34E-01 |          |
| Q5VSP4;P31025                                                                                                                                             | 0.00E+00 | 0.00E+00 | 0.00E+00 | 0.00E+00 | 0.00E+00 | 2.72E+06 | 0.00E+00 | 0.00E+00 | 0.00E+00 | 0.00E+00 | 0.00E+00 | 0.00E+00 | 0.00E+00 | 0.00E+00 | 0.00E+00 | 0.00E+00 | 0.00E+00 | 1.70E+05 | 3.39E+05 | 0.00E+00 | 6.79E+05 | 9.60E+05 | 0.00E+00 | 3.34E-01 |          |
| P31153-2;P31153                                                                                                                                           | 0.00E+00 | 0.00E+00 | 0.00E+00 | 0.00E+00 | 0.00E+00 | 6.18E+06 | 0.00E+00 | 0.00E+00 | 0.00E+00 | 0.00E+00 | 0.00E+00 | 0.00E+00 | 0.00E+00 | 0.00E+00 | 0.00E+00 | 0.00E+00 | 0.00E+00 | 3.86E+05 | 7.72E+05 | 0.00E+00 | 1.54E+06 | 2.18E+06 | 0.00E+00 | 3.34E-01 |          |
| P31937                                                                                                                                                    | 0.00E+00 | 0.00E+00 | 0.00E+00 | 0.00E+00 | 0.00E+00 | 0.00E+00 | 0.00E+00 | 0.00E+00 | 0.00E+00 | 0.00E+00 | 0.00E+00 | 0.00E+00 | 0.00E+00 | 9.56E+05 | 0.00E+00 | 0.00E+00 | 0.00E+00 | 5.98E+04 | 0.00E+00 | 1.20E+05 | 2.39E+05 | 0.00E+00 | 3.38E+05 | 3.34E-01 |          |
| P31939-2;P31939;H7C1S2                                                                                                                                    | 0.00E+00 | 0.00E+00 | 0.00E+00 | 0.00E+00 | 0.00E+00 | 0.00E+00 | 0.00E+00 | 0.00E+00 | 0.00E+00 | 0.00E+00 | 0.00E+00 | 0.00E+00 | 0.00E+00 | 0.00E+00 | 0.00E+00 | 0.00E+00 | 0.00E+00 | 3.11E+05 | 1.95E+04 | 0.00E+00 | 3.89E+04 | 7.78E+04 | 0.00E+00 | 1.10E+05 | 3.34E-01 |
| P31946-2;P31946                                                                                                                                           | 0.00E+00 | 0.00E+00 | 3.12E+06 | 0.00E+00 | 0.00E+00 | 0.00E+00 | 0.00E+00 | 0.00E+00 | 0.00E+00 | 0.00E+00 | 0.00E+00 | 0.00E+00 | 0.00E+00 | 0.00E+00 | 0.00E+00 | 0.00E+00 | 0.00E+00 | 1.95E+05 | 3.90E+05 | 0.00E+00 | 7.80E+05 | 1.10E+06 | 0.00E+00 | 3.34E-01 |          |
| P31947-2;P31947                                                                                                                                           | 0.00E+00 | 0.00E+00 | 1.03E+06 | 0.00E+00 | 0.00E+00 | 0.00E+00 | 0.00E+00 | 0.00E+00 | 0.00E+00 | 0.00E+00 | 0.00E+00 | 0.00E+00 | 0.00E+00 | 0.00E+00 | 0.00E+00 | 0.00E+00 | 0.00E+00 | 6.44E+04 | 1.29E+05 | 0.00E+00 | 2.58E+05 | 3.64E+05 | 0.00E+00 | 3.34E-01 |          |
| P34931                                                                                                                                                    | 0.00E+00 | 0.00E+00 | 0.00E+00 | 0.00E+00 | 0.00E+00 | 0.00E+00 | 3.24E+05 | 0.00E+00 | 0.00E+00 | 0.00E+00 | 0.00E+00 | 0.00E+00 | 0.00E+00 | 0.00E+00 | 0.00E+00 | 0.00E+00 | 0.00E+00 | 2.02E+04 | 4.04E+04 | 0.00E+00 | 8.09E+04 | 1.14E+05 | 0.00E+00 | 3.34E-01 |          |
| P35241;P35241-5;E9PNV3;E9PQ82                                                                                                                             | 1.19E+06 | 0.00E+00 | 0.00E+00 | 0.00E+00 | 0.00E+00 | 0.00E+00 | 0.00E+00 | 0.00E+00 | 0.00E+00 | 0.00E+00 | 0.00E+00 | 0.00E+00 | 0.00E+00 | 0.00E+00 | 0.00E+00 | 0.00E+00 | 0.00E+00 | 7.46E+04 | 1.49E+05 | 0.00E+00 | 2.98E+05 | 4.22E+05 | 0.00E+00 | 3.34E-01 |          |
| P35250-2;P35250;H7C5S7;H7C5P1;H7C5Q7;F8WC37;H7C5A0;H7C5G4;A0A087WVY3                                                                                      | 0.00E+00 | 0.00E+00 | 0.00E+00 | 0.00E+00 | 0.00E+00 | 0.00E+00 | 0.00E+00 | 0.00E+00 | 0.00E+00 | 0.00E+00 | 0.00E+00 | 0.00E+00 | 0.00E+00 | 0.00E+00 | 0.00E+00 | 0.00E+00 | 1.41E+06 | 8.84E+04 | 0.00E+00 | 1.77E+05 | 3.53E+05 | 0.00E+00 | 5.00E+05 | 3.34E-01 |          |
| P35270                                                                                                                                                    | 0.00E+00 | 0.00E+00 | 0.00E+00 | 0.00E+00 | 0.00E+00 | 0.00E+00 | 0.00E+00 | 0.00E+00 | 0.00E+00 | 0.00E+00 | 0.00E+00 | 0.00E+00 | 0.00E+00 | 0.00E+00 | 0.00E+00 | 5.32E+06 | 0.00E+00 | 3.33E+05 | 0.00E+00 | 6.65E+05 | 1.33E+06 | 0.00E+00 | 1.88E+06 | 3.34E-01 |          |
| P36551;H0YA22                                                                                                                                             | 0.00E+00 | 0.00E+00 | 0.00E+00 | 0.00E+00 | 0.00E+00 | 0.00E+00 | 0.00E+00 | 0.00E+00 | 0.00E+00 | 0.00E+00 | 4.17E+06 | 0.00E+00 | 0.00E+00 | 0.00E+00 | 0.00E+00 | 0.00E+00 | 0.00E+00 | 2.61E+05 | 0.00E+00 | 5.22E+05 | 1.04E+06 | 0.00E+00 | 1.48E+06 | 3.34E-01 |          |
| P38606-2;P38606                                                                                                                                           | 0.00E+00 | 0.00E+00 | 0.00E+00 | 0.00E+00 | 0.00E+00 | 0.00E+00 | 0.00E+00 | 0.00E+00 | 0.00E+00 | 0.00E+00 | 0.00E+00 | 0.00E+00 | 0.00E+00 | 2.08E+05 | 0.00E+00 | 0.00E+00 | 0.00E+00 | 1.30E+04 | 0.00E+00 | 2.60E+04 | 5.21E+04 | 0.00E+00 | 7.36E+04 | 3.34E-01 |          |
| P38919                                                                                                                                                    | 0.00E+00 | 0.00E+00 | 0.00E+00 | 0.00E+00 | 0.00E+00 | 0.00E+00 | 0.00E+00 | 0.00E+00 | 0.00E+00 | 0.00E+00 | 2.10E+06 | 0.00E+00 | 0.00E+00 | 0.00E+00 | 0.00E+00 | 0.00E+00 | 0.00E+00 | 1.32E+05 | 0.00E+00 | 2.63E+05 | 5.26E+05 | 0.00E+00 | 7.44E+05 | 3.34E-01 |          |
| P40222                                                                                                                                                    | 0.00E+00 | 0.00E+00 | 1.67E+06 | 0.00E+00 | 0.00E+00 | 0.00E+00 | 0.00E+00 | 0.00E+00 | 0.00E+00 | 0.00E+00 | 0.00E+00 | 0.00E+00 | 0.00E+00 | 0.00E+00 | 0.00E+00 | 0.00E+00 | 0.00E+00 | 1.04E+05 | 2.09E+05 | 0.00E+00 | 4.17E+05 | 5.90E+05 | 0.00E+00 | 3.34E-01 |          |

















|                                                                                                                  |          |          |          |          |          |          |          |          |          |          |          |          |          |          |          |          |          |          |          |          |          |          |          |          |
|------------------------------------------------------------------------------------------------------------------|----------|----------|----------|----------|----------|----------|----------|----------|----------|----------|----------|----------|----------|----------|----------|----------|----------|----------|----------|----------|----------|----------|----------|----------|
| Q9Y678                                                                                                           | 3.08E+07 | 4.78E+07 | 0.00E+00 | 1.74E+07 | 1.28E+07 | 8.43E+07 | 8.71E+07 | 5.70E+07 | 0.00E+00 | 0.00E+00 | 1.27E+07 | 1.24E+07 | 5.99E+07 | 0.00E+00 | 8.10E+07 | 4.35E+07 | 3.42E+07 | 4.21E+07 | 2.62E+07 | 3.20E+07 | 3.26E+07 | 3.13E+07 | 3.35E-01 |          |
| Q9Y6M5                                                                                                           | 0.00E+00 | 0.00E+00 | 0.00E+00 | 4.85E+06 | 0.00E+00 | 0.00E+00 | 0.00E+00 | 7.64E+06 | 7.64E+06 | 0.00E+00 | 0.00E+00 | 5.02E+06 | 6.05E+06 | 0.00E+00 | 0.00E+00 | 6.71E+06 | 2.37E+06 | 1.56E+06 | 3.18E+06 | 3.24E+06 | 2.99E+06 | 3.47E+06 | 3.35E-01 |          |
| P23634-7;P23634-6;P23634-8;P23634;P23634-5;P23634-4;P23634-3;P20020-5;P20020-2;P20020-6;P20020-3;P20020-4;P20020 | 3.62E+07 | 2.77E+07 | 2.36E+07 | 1.06E+07 | 0.00E+00 | 3.13E+07 | 3.29E+07 | 2.24E+07 | 0.00E+00 | 0.00E+00 | 0.00E+00 | 3.24E+07 | 4.04E+07 | 0.00E+00 | 2.13E+07 | 3.05E+07 | 1.93E+07 | 2.31E+07 | 1.56E+07 | 1.50E+07 | 1.22E+07 | 1.74E+07 | 3.36E-01 |          |
| P51148;P51148-2;K7ER18;K7ERQ8;F8VVK3;K7ENY4                                                                      | 3.28E+07 | 0.00E+00 | 4.00E+07 | 3.55E+07 | 3.50E+07 | 3.26E+07 | 0.00E+00 | 2.18E+07 | 2.34E+07 | 3.23E+07 | 3.96E+07 | 3.46E+07 | 2.74E+07 | 4.43E+07 | 2.56E+07 | 2.10E+07 | 2.79E+07 | 2.47E+07 | 3.10E+07 | 1.28E+07 | 1.61E+07 | 8.16E+06 | 3.40E-01 |          |
| P49748-2;P49748;P49748-3                                                                                         | 0.00E+00 | 0.00E+00 | 0.00E+00 | 0.00E+00 | 0.00E+00 | 2.07E+06 | 0.00E+00 | 2.32E+06 | 0.00E+00 | 0.00E+00 | 0.00E+00 | 0.00E+00 | 0.00E+00 | 0.00E+00 | 3.28E+06 | 6.54E+06 | 1.82E+06 | 1.00E+06 | 5.49E+05 | 1.45E+06 | 1.83E+06 | 1.02E+06 | 2.39E+06 | 3.40E-01 |
| P36543-2;P36543;P36543-3;C9J8H1                                                                                  | 1.19E+07 | 0.00E+00 | 7.33E+06 | 2.92E+07 | 2.97E+07 | 2.34E+07 | 5.96E+06 | 4.97E+06 | 0.00E+00 | 1.98E+07 | 1.36E+07 | 2.12E+07 | 8.56E+06 | 0.00E+00 | 0.00E+00 | 8.86E+06 | 1.15E+07 | 1.41E+07 | 9.00E+06 | 1.03E+07 | 1.17E+07 | 8.69E+06 | 3.43E-01 |          |
| P13995;B9A062;P13995-2                                                                                           | 0.00E+00 | 0.00E+00 | 0.00E+00 | 0.00E+00 | 0.00E+00 | 0.00E+00 | 4.27E+06 | 1.07E+07 | 4.23E+06 | 4.51E+06 | 0.00E+00 | 0.00E+00 | 0.00E+00 | 6.36E+06 | 6.41E+06 | 7.24E+06 | 2.73E+06 | 1.87E+06 | 3.59E+06 | 3.51E+06 | 3.86E+06 | 3.14E+06 | 3.43E-01 |          |
| P49588;P49588-2                                                                                                  | 0.00E+00 | 0.00E+00 | 2.20E+07 | 1.45E+07 | 1.66E+07 | 1.91E+07 | 7.40E+06 | 1.97E+07 | 1.23E+07 | 1.48E+07 | 0.00E+00 | 9.58E+06 | 1.19E+07 | 1.20E+07 | 0.00E+00 | 9.85E+06 | 1.06E+07 | 1.24E+07 | 8.80E+06 | 7.40E+06 | 8.82E+06 | 5.66E+06 | 3.46E-01 |          |
| P52209-2;P52209;K7EMN2;K7EM49;K7EPF6                                                                             | 2.02E+07 | 2.82E+07 | 2.39E+07 | 7.48E+06 | 3.15E+07 | 1.92E+07 | 1.21E+07 | 4.08E+07 | 1.84E+07 | 0.00E+00 | 1.51E+07 | 3.03E+07 | 3.00E+07 | 2.10E+07 | 0.00E+00 | 2.47E+07 | 2.02E+07 | 2.29E+07 | 1.74E+07 | 1.13E+07 | 1.07E+07 | 1.20E+07 | 3.48E-01 |          |
| O00299                                                                                                           | 0.00E+00 | 0.00E+00 | 1.01E+07 | 0.00E+00 | 0.00E+00 | 1.28E+07 | 1.17E+07 | 1.23E+07 | 0.00E+00 | 0.00E+00 | 0.00E+00 | 0.00E+00 | 1.24E+07 | 0.00E+00 | 0.00E+00 | 1.15E+07 | 4.43E+06 | 5.87E+06 | 2.99E+06 | 5.93E+06 | 6.32E+06 | 5.54E+06 | 3.48E-01 |          |
| Q99714;Q99714-2;Q5H928                                                                                           | 2.83E+07 | 4.59E+07 | 6.54E+07 | 4.40E+07 | 4.47E+07 | 7.07E+07 | 0.00E+00 | 5.77E+07 | 1.02E+07 | 5.23E+07 | 3.80E+07 | 1.04E+07 | 4.16E+07 | 6.45E+06 | 6.00E+07 | 5.21E+07 | 3.92E+07 | 4.46E+07 | 3.39E+07 | 2.20E+07 | 2.25E+07 | 2.17E+07 | 3.49E-01 |          |
| P29401;P29401-2                                                                                                  | 2.29E+08 | 3.53E+08 | 6.00E+08 | 2.79E+08 | 5.68E+08 | 6.49E+08 | 6.28E+08 | 5.59E+08 | 3.74E+08 | 4.59E+08 | 4.89E+08 | 3.29E+08 | 5.24E+08 | 5.54E+06 | 5.73E+08 | 4.47E+08 | 4.42E+08 | 4.83E+08 | 4.00E+08 | 1.72E+08 | 1.68E+08 | 1.77E+08 | 3.53E-01 |          |
| P04406-2;P04406;E7EUT5                                                                                           | 2.14E+07 | 3.50E+07 | 2.00E+07 | 1.88E+07 | 3.60E+07 | 0.00E+00 | 3.10E+07 | 2.24E+07 | 0.00E+00 | 2.54E+07 | 2.94E+07 | 0.00E+00 | 3.43E+07 | 1.49E+07 | 1.71E+07 | 1.71E+07 | 2.02E+07 | 2.31E+07 | 1.73E+07 | 1.20E+07 | 1.16E+07 | 1.26E+07 | 3.53E-01 |          |
| P41252;J3KR24;A0A0A0MSX9                                                                                         | 1.34E+08 | 2.25E+08 | 9.18E+07 | 1.41E+08 | 1.99E+08 | 1.19E+08 | 1.84E+08 | 1.44E+08 | 0.00E+00 | 1.32E+08 | 1.38E+08 | 1.72E+08 | 1.96E+08 | 3.36E+07 | 1.93E+08 | 1.45E+08 | 1.40E+08 | 1.55E+08 | 1.26E+08 | 5.97E+07 | 4.44E+07 | 7.22E+07 | 3.57E-01 |          |
| P04075;J3KPS3;P04075-2;H3BQN4;H3BPS8;H3BUH7                                                                      | 0.00E+00 | 0.00E+00 | 0.00E+00 | 0.00E+00 | 0.00E+00 | 0.00E+00 | 2.76E+06 | 0.00E+00 | 0.00E+00 | 0.00E+00 | 0.00E+00 | 0.00E+00 | 0.00E+00 | 0.00E+00 | 4.44E+06 | 0.00E+00 | 4.43E+06 | 7.27E+05 | 3.45E+05 | 1.11E+06 | 1.60E+06 | 9.75E+05 | 2.05E+06 | 3.58E-01 |
| P13489;E9PMN0;E9PIK5;E9PMJ3;E9PLZ3;E9PIM9;H0YCR7                                                                 | 8.37E+06 | 5.65E+06 | 7.22E+06 | 0.00E+00 | 0.00E+00 | 0.00E+00 | 0.00E+00 | 0.00E+00 | 0.00E+00 | 0.00E+00 | 0.00E+00 | 4.42E+06 | 5.18E+06 | 0.00E+00 | 0.00E+00 | 0.00E+00 | 1.93E+06 | 2.66E+06 | 1.20E+06 | 3.07E+06 | 3.74E+06 | 2.23E+06 | 3.60E-01 |          |
| Q06323;Q06323-3;Q06323-2                                                                                         | 0.00E+00 | 0.00E+00 | 0.00E+00 | 2.71E+06 | 0.00E+00 | 0.00E+00 | 0.00E+00 | 0.00E+00 | 3.60E+06 | 0.00E+00 | 0.00E+00 | 0.00E+00 | 0.00E+00 | 5.03E+06 | 0.00E+00 | 0.00E+00 | 7.09E+05 | 3.39E+05 | 1.08E+06 | 1.58E+06 | 9.59E+05 | 2.04E+06 | 3.68E-01 |          |
| P23786                                                                                                           | 9.86E+06 | 0.00E+00 | 1.39E+07 | 0.00E+00 | 1.02E+07 | 0.00E+00 | 0.00E+00 | 1.27E+07 | 1.24E+07 | 0.00E+00 | 0.00E+00 | 2.30E+07 | 1.27E+07 | 1.57E+07 | 0.00E+00 | 1.07E+07 | 7.57E+06 | 5.82E+06 | 9.32E+06 | 7.50E+06 | 6.35E+06 | 8.56E+06 | 3.69E-01 |          |
| Q92896;Q92896-3;Q92896-2;H3BM42                                                                                  | 0.00E+00 | 8.57E+07 | 0.00E+00 | 3.97E+07 | 3.70E+07 | 0.00E+00 | 7.62E+07 | 7.80E+07 | 1.49E+07 | 3.84E+07 | 3.58E+07 | 0.00E+00 | 3.85E+07 | 0.00E+00 | 4.42E+07 | 3.64E+07 | 3.28E+07 | 3.96E+07 | 2.60E+07 | 2.91E+07 | 3.71E+07 | 1.82E+07 | 3.70E-01 |          |
| P34932;A0A087WYC1;A0A087WTS8                                                                                     | 0.00E+00 | 0.00E+00 | 0.00E+00 | 0.00E+00 | 0.00E+00 | 3.08E+06 | 0.00E+00 | 0.00E+00 | 0.00E+00 | 0.00E+00 | 0.00E+00 | 5.84E+06 | 3.78E+06 | 0.00E+00 | 0.00E+00 | 0.00E+00 | 7.94E+05 | 3.85E+05 | 1.20E+06 | 1.79E+06 | 1.09E+06 | 2.29E+06 | 3.77E-01 |          |
| O60762;Q5QPK2;H0Y368;Q5QPJ9                                                                                      | 0.00E+00 | 0.00E+00 | 0.00E+00 | 0.00E+00 | 0.00E+00 | 2.23E+07 | 0.00E+00 | 1.78E+07 | 0.00E+00 | 0.00E+00 | 2.34E+07 | 1.58E+07 | 0.00E+00 | 1.89E+07 | 0.00E+00 | 1.79E+07 | 7.25E+06 | 5.01E+06 | 9.49E+06 | 9.81E+06 | 9.35E+06 | 1.04E+07 | 3.79E-01 |          |
| F8VVM2;Q00325-2;Q00325;F8VZL5;F8VWR4;F8VWQ0                                                                      | 3.28E+07 | 2.91E+07 | 2.91E+07 | 4.05E+07 | 0.00E+00 | 3.85E+07 | 0.00E+00 | 3.15E+07 | 3.66E+07 | 3.21E+07 | 6.82E+07 | 2.64E+07 | 2.04E+07 | 1.41E+07 | 2.09E+07 | 4.32E+07 | 2.90E+07 | 2.52E+07 | 3.27E+07 | 1.65E+07 | 1.61E+07 | 1.72E+07 | 3.80E-01 |          |
| P20700;E9PBF6                                                                                                    | 4.25E+07 | 5.68E+07 | 2.67E+07 | 4.28E+07 | 5.85E+07 | 0.00E+00 | 4.64E+07 | 4.67E+07 | 1.04E+07 | 2.32E+07 | 2.86E+07 | 1.36E+07 | 6.24E+07 | 3.01E+07 | 5.19E+07 | 3.36E+07 | 3.59E+07 | 4.00E+07 | 3.17E+07 | 1.82E+07 | 1.89E+07 | 1.78E+07 | 3.80E-01 |          |
| Q00341;A0A024R4E5;Q00341-2;H0Y394                                                                                | 0.00E+00 | 0.00E+00 | 0.00E+00 | 4.86E+07 | 0.00E+00 | 0.00E+00 | 0.00E+00 | 0.00E+00 | 0.00E+00 | 7.21E+07 | 0.00E+00 | 7.23E+07 | 0.00E+00 | 0.00E+00 | 0.00E+00 | 0.00E+00 | 1.21E+07 | 6.07E+06 | 1.80E+07 | 2.64E+07 | 1.72E+07 | 3.34E+07 | 3.83E-01 |          |





|                                                                                                                                                                  |          |          |          |          |          |          |          |          |          |          |          |          |          |          |          |          |          |          |          |          |          |          |          |          |
|------------------------------------------------------------------------------------------------------------------------------------------------------------------|----------|----------|----------|----------|----------|----------|----------|----------|----------|----------|----------|----------|----------|----------|----------|----------|----------|----------|----------|----------|----------|----------|----------|----------|
| P00492                                                                                                                                                           | 4.80E+06 | 0.00E+00 | 9.65E+06 | 0.00E+00 | 0.00E+00 | 6.30E+06 | 0.00E+00 | 0.00E+00 | 3.59E+06 | 0.00E+00 | 6.82E+06 | 0.00E+00 | 0.00E+00 | 0.00E+00 | 0.00E+00 | 0.00E+00 | 1.95E+06 | 2.59E+06 | 1.30E+06 | 3.21E+06 | 3.82E+06 | 2.56E+06 | 4.40E-01 |          |
| P54136-2;P54136                                                                                                                                                  | 6.41E+07 | 6.10E+07 | 7.26E+07 | 5.22E+07 | 5.13E+07 | 2.38E+07 | 5.21E+07 | 6.31E+07 | 5.68E+07 | 3.78E+07 | 5.34E+07 | 5.57E+07 | 4.58E+07 | 6.29E+07 | 4.58E+07 | 4.42E+07 | 5.26E+07 | 5.50E+07 | 5.03E+07 | 1.17E+07 | 1.46E+07 | 8.24E+06 | 4.42E-01 |          |
| P05023-3;P05023-4;P05023;P05023-2                                                                                                                                | 3.57E+06 | 0.00E+00 | 6.00E+06 | 0.00E+00 | 4.31E+06 | 2.78E+06 | 1.28E+07 | 7.15E+06 | 4.68E+06 | 4.42E+06 | 3.67E+06 | 0.00E+00 | 3.52E+06 | 0.00E+00 | 2.70E+06 | 6.92E+06 | 3.91E+06 | 4.58E+06 | 3.24E+06 | 3.35E+06 | 4.19E+06 | 2.35E+06 | 4.43E-01 |          |
| P27695;G3V5Q1;G3V3M6;G3V5M0;G3V359;G3V3C7;H7C4A8                                                                                                                 | 4.34E+07 | 6.84E+07 | 3.97E+07 | 2.15E+07 | 2.41E+07 | 0.00E+00 | 5.34E+07 | 4.30E+07 | 3.00E+07 | 3.18E+07 | 2.90E+07 | 3.24E+07 | 6.56E+07 | 1.08E+07 | 1.52E+07 | 1.84E+07 | 3.29E+07 | 3.67E+07 | 2.91E+07 | 1.89E+07 | 2.11E+07 | 1.69E+07 | 4.43E-01 |          |
| Q14152;Q14152-2                                                                                                                                                  | 0.00E+00 | 0.00E+00 | 0.00E+00 | 0.00E+00 | 0.00E+00 | 0.00E+00 | 1.85E+07 | 1.26E+07 | 0.00E+00 | 0.00E+00 | 0.00E+00 | 1.18E+07 | 1.59E+07 | 0.00E+00 | 1.13E+07 | 1.53E+07 | 5.33E+06 | 3.88E+06 | 6.78E+06 | 7.29E+06 | 7.36E+06 | 7.41E+06 | 4.45E-01 |          |
| J3QR09;J3KTE4;P84098;J3QL15                                                                                                                                      | 1.37E+07 | 5.40E+06 | 1.73E+07 | 9.71E+06 | 1.29E+07 | 3.38E+07 | 1.28E+07 | 2.76E+07 | 8.97E+06 | 0.00E+00 | 0.00E+00 | 0.00E+00 | 1.52E+07 | 4.77E+07 | 0.00E+00 | 1.91E+07 | 1.40E+07 | 1.67E+07 | 1.14E+07 | 1.33E+07 | 9.47E+06 | 1.66E+07 | 4.47E-01 |          |
| P36542;P36542-2                                                                                                                                                  | 2.22E+08 | 1.25E+08 | 1.65E+08 | 2.13E+08 | 1.47E+08 | 2.14E+08 | 1.21E+08 | 1.68E+08 | 1.11E+08 | 2.49E+08 | 5.25E+06 | 2.40E+08 | 1.36E+08 | 2.34E+08 | 0.00E+00 | 1.63E+08 | 1.57E+08 | 1.72E+08 | 1.42E+08 | 7.51E+07 | 4.03E+07 | 9.98E+07 | 4.48E-01 |          |
| P49411                                                                                                                                                           | 0.00E+00 | 5.97E+06 | 0.00E+00 | 0.00E+00 | 0.00E+00 | 0.00E+00 | 8.52E+06 | 0.00E+00 | 0.00E+00 | 1.06E+07 | 0.00E+00 | 0.00E+00 | 0.00E+00 | 0.00E+00 | 0.00E+00 | 7.60E+06 | 9.28E+06 | 2.62E+06 | 1.81E+06 | 3.43E+06 | 4.12E+06 | 3.42E+06 | 4.81E+06 | 4.50E-01 |
| O00410;H0Y8C6;O00410-3;O00410-2                                                                                                                                  | 5.69E+06 | 0.00E+00 | 0.00E+00 | 0.00E+00 | 0.00E+00 | 0.00E+00 | 0.00E+00 | 0.00E+00 | 0.00E+00 | 0.00E+00 | 0.00E+00 | 0.00E+00 | 1.34E+07 | 3.58E+06 | 0.00E+00 | 0.00E+00 | 0.00E+00 | 1.42E+06 | 7.12E+05 | 2.12E+06 | 3.58E+06 | 2.01E+06 | 4.72E+06 | 4.50E-01 |
| P09661;H0YMA0;H0YLR3;H0YKK0                                                                                                                                      | 5.43E+07 | 1.71E+07 | 2.81E+07 | 1.50E+07 | 1.60E+07 | 1.23E+07 | 0.00E+00 | 0.00E+00 | 2.58E+07 | 1.36E+07 | 1.60E+07 | 0.00E+00 | 0.00E+00 | 3.79E+07 | 0.00E+00 | 0.00E+00 | 1.48E+07 | 1.78E+07 | 1.17E+07 | 1.57E+07 | 1.74E+07 | 1.44E+07 | 4.51E-01 |          |
| O95202                                                                                                                                                           | 0.00E+00 | 0.00E+00 | 0.00E+00 | 0.00E+00 | 0.00E+00 | 0.00E+00 | 4.86E+06 | 0.00E+00 | 0.00E+00 | 0.00E+00 | 0.00E+00 | 0.00E+00 | 7.12E+06 | 0.00E+00 | 0.00E+00 | 5.07E+06 | 1.07E+06 | 6.07E+05 | 1.52E+06 | 2.34E+06 | 1.72E+06 | 2.87E+06 | 4.52E-01 |          |
| O75396;A0A087X1A9                                                                                                                                                | 0.00E+00 | 0.00E+00 | 0.00E+00 | 0.00E+00 | 0.00E+00 | 3.84E+06 | 2.30E+06 | 0.00E+00 | 0.00E+00 | 0.00E+00 | 0.00E+00 | 0.00E+00 | 0.00E+00 | 0.00E+00 | 0.00E+00 | 2.41E+06 | 0.00E+00 | 5.34E+05 | 7.67E+05 | 3.02E+05 | 1.19E+06 | 1.48E+06 | 8.53E+05 | 4.53E-01 |
| Q14249                                                                                                                                                           | 0.00E+00 | 0.00E+00 | 0.00E+00 | 0.00E+00 | 0.00E+00 | 0.00E+00 | 9.81E+06 | 9.74E+06 | 0.00E+00 | 0.00E+00 | 0.00E+00 | 0.00E+00 | 0.00E+00 | 0.00E+00 | 0.00E+00 | 0.00E+00 | 7.94E+06 | 1.72E+06 | 2.44E+06 | 9.92E+05 | 3.71E+06 | 4.53E+06 | 2.81E+06 | 4.54E-01 |
| F5GWX5;Q14839;Q14839-2                                                                                                                                           | 0.00E+00 | 6.28E+06 | 0.00E+00 | 0.00E+00 | 0.00E+00 | 4.77E+06 | 6.02E+06 | 7.41E+06 | 0.00E+00 | 0.00E+00 | 0.00E+00 | 3.98E+06 | 6.41E+06 | 0.00E+00 | 0.00E+00 | 4.74E+06 | 2.48E+06 | 3.06E+06 | 1.89E+06 | 3.00E+06 | 3.35E+06 | 2.69E+06 | 4.54E-01 |          |
| P61224-3;P61224;A6NIZ1;F5H823;B7ZB78;F5GZG1;P61224-2;F5GX62;P61224-4;E7ESV4;F5H7Y6;P62834;F5H6R7;F5H004                                                          | 1.21E+07 | 9.83E+06 | 0.00E+00 | 1.03E+07 | 0.00E+00 | 9.69E+06 | 8.40E+06 | 1.01E+07 | 0.00E+00 | 5.19E+06 | 9.01E+06 | 1.06E+07 | 6.82E+06 | 6.71E+06 | 0.00E+00 | 8.80E+06 | 6.72E+06 | 7.56E+06 | 5.89E+06 | 4.34E+06 | 4.78E+06 | 3.99E+06 | 4.59E-01 |          |
| Q9Y6M7-4;Q9Y6M7-3;C9JRP1;Q9Y6M7-2;Q9Y6M7-9;Q9Y6M7-6;Q9Y6M7-13;A0A0A0MST8;Q9Y6M7-12;E9PFN4;Q9Y6M7;Q9Y6M7-8;Q9Y6M7-7;Q9Y6M7-11;Q9Y6M7-14;Q9Y6M7-10;Q9Y6M7-5;H7C3C4 | 3.79E+08 | 3.11E+08 | 3.78E+08 | 1.57E+08 | 1.17E+08 | 2.81E+08 | 2.75E+08 | 3.89E+08 | 4.54E+08 | 3.27E+08 | 3.77E+08 | 1.94E+07 | 3.45E+08 | 7.36E+08 | 2.63E+08 | 2.52E+08 | 3.16E+08 | 2.86E+08 | 3.47E+08 | 1.58E+08 | 1.03E+08 | 2.03E+08 | 4.61E-01 |          |
| P40926;P40926-2;G3XAL0                                                                                                                                           | 2.08E+07 | 2.72E+07 | 2.28E+07 | 3.29E+07 | 4.62E+07 | 3.74E+07 | 0.00E+00 | 1.63E+07 | 2.76E+07 | 2.35E+07 | 4.78E+07 | 2.20E+07 | 4.09E+07 | 2.77E+07 | 2.36E+07 | 2.63E+07 | 2.77E+07 | 2.54E+07 | 2.99E+07 | 1.18E+07 | 1.41E+07 | 9.32E+06 | 4.64E-01 |          |
| P08107;P08107-2;V9GZ37                                                                                                                                           | 0.00E+00 | 0.00E+00 | 0.00E+00 | 0.00E+00 | 0.00E+00 | 0.00E+00 | 7.99E+06 | 0.00E+00 | 1.01E+07 | 0.00E+00 | 0.00E+00 | 0.00E+00 | 0.00E+00 | 0.00E+00 | 0.00E+00 | 8.95E+06 | 0.00E+00 | 1.69E+06 | 9.98E+05 | 2.39E+06 | 3.66E+06 | 2.82E+06 | 4.43E+06 | 4.67E-01 |
| P14324-2;P14324;A0A087X1D8;A0A087WVN4                                                                                                                            | 6.25E+08 | 4.94E+08 | 3.27E+08 | 4.41E+08 | 9.28E+08 | 4.71E+08 | 4.37E+08 | 6.24E+08 | 2.45E+08 | 6.59E+08 | 3.16E+08 | 3.15E+08 | 8.86E+08 | 5.98E+08 | 2.36E+08 | 4.66E+08 | 5.04E+08 | 5.43E+08 | 4.65E+08 | 2.07E+08 | 1.84E+08 | 2.33E+08 | 4.69E-01 |          |
| Q5VTE0;P68104;P68104-2;A0A087WVQ9;A0A087WV01                                                                                                                     | 2.52E+07 | 1.14E+07 | 1.57E+07 | 1.21E+07 | 5.47E+06 | 8.20E+06 | 0.00E+00 | 1.25E+07 | 2.75E+07 | 1.42E+07 | 0.00E+00 | 2.58E+07 | 9.96E+06 | 2.93E+07 | 0.00E+00 | 1.29E+07 | 1.31E+07 | 1.13E+07 | 1.50E+07 | 9.64E+06 | 7.43E+06 | 1.17E+07 | 4.70E-01 |          |
| P07954-2;P07954                                                                                                                                                  | 0.00E+00 | 0.00E+00 | 0.00E+00 | 1.06E+07 | 0.00E+00 | 1.16E+07 | 6.50E+06 | 1.40E+07 | 0.00E+00 | 0.00E+00 | 0.00E+00 | 0.00E+00 | 5.60E+06 | 1.36E+07 | 0.00E+00 | 6.97E+06 | 4.30E+06 | 5.33E+06 | 3.27E+06 | 5.49E+06 | 6.06E+06 | 5.05E+06 | 4.70E-01 |          |
| Q16836;E9PF18;Q16836-3;Q16836-2;A0A0A0MSE2                                                                                                                       | 0.00E+00 | 0.00E+00 | 0.00E+00 | 0.00E+00 | 0.00E+00 | 3.89E+06 | 0.00E+00 | 0.00E+00 | 0.00E+00 | 0.00E+00 | 0.00E+00 | 0.00E+00 | 6.21E+06 | 0.00E+00 | 0.00E+00 | 3.35E+06 | 0.00E+00 | 8.40E+05 | 4.86E+05 | 1.19E+06 | 1.89E+06 | 1.37E+06 | 2.34E+06 | 4.72E-01 |







|                                                                                                                                                                                                  |          |          |          |          |          |          |          |          |          |          |          |          |          |          |          |          |          |          |          |          |          |          |          |          |
|--------------------------------------------------------------------------------------------------------------------------------------------------------------------------------------------------|----------|----------|----------|----------|----------|----------|----------|----------|----------|----------|----------|----------|----------|----------|----------|----------|----------|----------|----------|----------|----------|----------|----------|----------|
| P50990;P50990-2;P50990-3                                                                                                                                                                         | 0.00E+00 | 0.00E+00 | 0.00E+00 | 0.00E+00 | 0.00E+00 | 0.00E+00 | 9.06E+06 | 4.53E+06 | 0.00E+00 | 0.00E+00 | 0.00E+00 | 0.00E+00 | 0.00E+00 | 5.58E+06 | 0.00E+00 | 6.02E+06 | 7.64E+06 | 2.05E+06 | 1.70E+06 | 2.41E+06 | 3.28E+06 | 3.37E+06 | 3.37E+06 | 6.82E-01 |
| P04632;K7ELJ7;K7EM73;K7EIV0;A0A075B7C0;U3KQE2;K7EKD8                                                                                                                                             | 8.05E+06 | 0.00E+00 | 0.00E+00 | 0.00E+00 | 0.00E+00 | 0.00E+00 | 5.59E+06 | 4.65E+06 | 0.00E+00 | 0.00E+00 | 0.00E+00 | 0.00E+00 | 0.00E+00 | 0.00E+00 | 7.47E+06 | 7.94E+06 | 9.26E+06 | 2.68E+06 | 2.29E+06 | 3.08E+06 | 3.71E+06 | 3.29E+06 | 4.28E+06 | 6.82E-01 |
| Q93009-3;Q93009;H3BND8                                                                                                                                                                           | 0.00E+00 | 2.50E+07 | 5.03E+07 | 3.36E+07 | 2.48E+07 | 3.71E+07 | 2.73E+07 | 1.56E+07 | 0.00E+00 | 4.48E+07 | 0.00E+00 | 3.94E+07 | 3.10E+07 | 1.58E+07 | 3.04E+07 | 2.59E+07 | 2.51E+07 | 2.67E+07 | 2.34E+07 | 1.54E+07 | 1.49E+07 | 1.68E+07 | 6.84E-01 |          |
| HOYA96;HOY8G5;Q14103-4;Q14103-3;Q14103-2;Q14103;D6RF44;D6RAF8;D6RBQ9                                                                                                                             | 0.00E+00 | 0.00E+00 | 0.00E+00 | 0.00E+00 | 0.00E+00 | 0.00E+00 | 0.00E+00 | 5.27E+06 | 0.00E+00 | 0.00E+00 | 0.00E+00 | 0.00E+00 | 0.00E+00 | 3.70E+06 | 0.00E+00 | 2.74E+06 | 1.62E+06 | 8.33E+05 | 6.58E+05 | 1.01E+06 | 1.64E+06 | 1.86E+06 | 1.50E+06 | 6.85E-01 |
| Q96AY3                                                                                                                                                                                           | 0.00E+00 | 0.00E+00 | 1.67E+07 | 1.63E+07 | 1.93E+07 | 1.03E+07 | 1.14E+07 | 1.37E+07 | 1.96E+07 | 1.68E+07 | 1.40E+07 | 0.00E+00 | 1.04E+07 | 1.63E+07 | 7.39E+06 | 1.45E+07 | 1.17E+07 | 1.09E+07 | 1.24E+07 | 6.64E+06 | 7.35E+06 | 6.28E+06 | 6.87E-01 |          |
| Q12907;D6RBV2;D6RIU4                                                                                                                                                                             | 4.66E+08 | 2.79E+08 | 4.58E+08 | 6.11E+08 | 4.78E+08 | 6.94E+08 | 3.82E+08 | 4.22E+08 | 3.76E+08 | 5.37E+08 | 4.14E+08 | 5.16E+08 | 5.11E+08 | 6.61E+06 | 5.90E+08 | 5.74E+08 | 4.57E+08 | 4.74E+08 | 4.41E+08 | 1.58E+08 | 1.29E+08 | 1.90E+08 | 6.89E-01 |          |
| P07355;P07355-2;HOYN42;HOYMD0;HOYMU9;AGNMY6;HOYM50;HOYKS4;HOYNP5;HOYN28;HOYL33                                                                                                                   | 0.00E+00 | 4.58E+06 | 5.11E+06 | 0.00E+00 | 0.00E+00 | 0.00E+00 | 3.87E+06 | 5.28E+06 | 0.00E+00 | 5.57E+06 | 3.79E+06 | 0.00E+00 | 3.99E+06 | 0.00E+00 | 5.48E+06 | 4.04E+06 | 2.61E+06 | 2.35E+06 | 2.86E+06 | 2.43E+06 | 2.55E+06 | 2.46E+06 | 6.93E-01 |          |
| P25685;P25685-2;MOR080                                                                                                                                                                           | 1.34E+08 | 1.33E+08 | 1.15E+08 | 1.37E+08 | 1.07E+08 | 1.36E+08 | 8.47E+07 | 1.06E+08 | 2.24E+08 | 1.59E+08 | 1.97E+08 | 0.00E+00 | 9.65E+07 | 1.78E+08 | 8.10E+07 | 1.04E+08 | 1.25E+08 | 1.19E+08 | 1.30E+08 | 5.20E+07 | 1.90E+07 | 7.33E+07 | 6.94E-01 |          |
| J3KFX7;Q99623;Q99623-2;F5GY37;F5H3X6;F5GW A7                                                                                                                                                     | 0.00E+00 | 0.00E+00 | 0.00E+00 | 2.06E+07 | 0.00E+00 | 2.50E+07 | 2.83E+07 | 1.90E+07 | 0.00E+00 | 2.89E+07 | 0.00E+00 | 2.96E+07 | 0.00E+00 | 2.48E+07 | 0.00E+00 | 3.21E+07 | 1.30E+07 | 1.16E+07 | 1.44E+07 | 1.38E+07 | 1.27E+07 | 1.56E+07 | 6.97E-01 |          |
| H3BSJ9;H3BRG4;P22695;H3BP04                                                                                                                                                                      | 0.00E+00 | 0.00E+00 | 0.00E+00 | 0.00E+00 | 3.33E+06 | 7.20E+06 | 4.58E+06 | 4.31E+06 | 2.94E+06 | 3.71E+06 | 1.33E+06 | 0.00E+00 | 0.00E+00 | 0.00E+00 | 9.78E+06 | 6.74E+06 | 2.74E+06 | 2.43E+06 | 3.06E+06 | 3.13E+06 | 2.81E+06 | 3.59E+06 | 7.00E-01 |          |
| Q96CS3                                                                                                                                                                                           | 2.25E+07 | 1.90E+07 | 2.03E+07 | 3.03E+07 | 2.38E+07 | 1.98E+07 | 0.00E+00 | 1.64E+07 | 1.35E+07 | 2.07E+07 | 3.08E+07 | 2.43E+07 | 1.74E+07 | 2.40E+07 | 1.08E+07 | 2.28E+07 | 1.98E+07 | 1.90E+07 | 2.05E+07 | 7.45E+06 | 8.74E+06 | 6.43E+06 | 7.00E-01 |          |
| Q9NV17-2;Q9NV17;Q9NV17-3;HOY2VW2                                                                                                                                                                 | 0.00E+00 | 0.00E+00 | 0.00E+00 | 0.00E+00 | 0.00E+00 | 0.00E+00 | 5.40E+06 | 4.27E+06 | 0.00E+00 | 5.51E+06 | 0.00E+00 | 0.00E+00 | 0.00E+00 | 0.00E+00 | 0.00E+00 | 0.00E+00 | 8.64E+06 | 1.49E+06 | 1.21E+06 | 1.77E+06 | 2.79E+06 | 2.26E+06 | 3.38E+06 | 7.02E-01 |
| P42285                                                                                                                                                                                           | 1.91E+06 | 0.00E+00 | 1.12E+06 | 0.00E+00 | 0.00E+00 | 1.09E+06 | 1.52E+06 | 0.00E+00 | 7.67E+05 | 0.00E+00 | 0.00E+00 | 0.00E+00 | 0.00E+00 | 2.66E+06 | 0.00E+00 | 8.63E+05 | 6.21E+05 | 7.05E+05 | 5.36E+05 | 8.43E+05 | 7.95E+05 | 9.35E+05 | 7.03E-01 |          |
| P43686-2;P43686                                                                                                                                                                                  | 1.46E+08 | 1.18E+08 | 1.47E+08 | 1.68E+08 | 1.48E+08 | 2.07E+08 | 1.54E+08 | 1.44E+08 | 1.47E+08 | 1.28E+08 | 1.44E+08 | 1.58E+08 | 1.50E+08 | 1.61E+08 | 1.56E+08 | 1.57E+08 | 1.52E+08 | 1.54E+08 | 1.50E+08 | 1.91E+07 | 2.57E+07 | 1.07E+07 | 7.04E-01 |          |
| Q9NZM1-6;Q9NZM1;Q9NZM1-3;Q9NZM1-2;Q9NZM1-5                                                                                                                                                       | 2.54E+07 | 3.16E+07 | 0.00E+00 | 0.00E+00 | 0.00E+00 | 2.99E+07 | 2.88E+07 | 1.39E+07 | 0.00E+00 | 0.00E+00 | 0.00E+00 | 0.00E+00 | 3.15E+07 | 2.32E+07 | 0.00E+00 | 2.78E+07 | 2.46E+07 | 1.48E+07 | 1.62E+07 | 1.34E+07 | 1.41E+07 | 1.44E+07 | 1.45E+07 | 7.04E-01 |
| O14818;Q14818-2;HOY586;Q8TAA3-2;Q8TAA3-5;Q8TAA3                                                                                                                                                  | 2.42E+07 | 3.03E+07 | 0.00E+00 | 3.08E+07 | 4.29E+07 | 0.00E+00 | 3.93E+07 | 3.64E+07 | 3.90E+07 | 0.00E+00 | 3.48E+07 | 0.00E+00 | 0.00E+00 | 0.00E+00 | 5.49E+07 | 4.38E+07 | 2.35E+07 | 2.55E+07 | 2.16E+07 | 2.00E+07 | 1.68E+07 | 2.37E+07 | 7.07E-01 |          |
| J3QS39;J3QTR3;F5H6Q2;P62987;F5GYU3;F5H2Z3;F5H265;B4DV12;F5H388;P62979;F5H747;F5GXK7;J3QKN0;J3QLP7;Q5PY61;P0CG47;J3QRK5;Q96C32;P0CG48;J3QSA3;K7EMA8;F5GZ39;MOR1V7;A0A087WV77;J3KSM4;MOR1M6;MOR2S1 | 4.43E+06 | 0.00E+00 | 0.00E+00 | 0.00E+00 | 0.00E+00 | 0.00E+00 | 0.00E+00 | 0.00E+00 | 2.42E+06 | 0.00E+00 | 0.00E+00 | 4.46E+06 | 0.00E+00 | 0.00E+00 | 0.00E+00 | 0.00E+00 | 7.07E+05 | 5.54E+05 | 8.61E+05 | 1.58E+06 | 1.57E+06 | 1.68E+06 | 7.12E-01 |          |
| P42126-2;P42126;Q96DC0;H3BS70                                                                                                                                                                    | 0.00E+00 | 3.01E+06 | 0.00E+00 | 0.00E+00 | 0.00E+00 | 4.19E+06 | 0.00E+00 | 3.25E+06 | 0.00E+00 | 0.00E+00 | 0.00E+00 | 0.00E+00 | 4.34E+06 | 0.00E+00 | 0.00E+00 | 0.00E+00 | 3.37E+06 | 1.13E+06 | 1.31E+06 | 9.64E+05 | 1.77E+06 | 1.83E+06 | 1.80E+06 | 7.12E-01 |
| A0A0AMRF4;P49406;S4R3W9                                                                                                                                                                          | 6.40E+06 | 0.00E+00 | 0.00E+00 | 0.00E+00 | 0.00E+00 | 0.00E+00 | 0.00E+00 | 0.00E+00 | 0.00E+00 | 0.00E+00 | 0.00E+00 | 0.00E+00 | 0.00E+00 | 3.63E+06 | 0.00E+00 | 0.00E+00 | 0.00E+00 | 6.27E+05 | 8.00E+05 | 4.54E+05 | 1.79E+06 | 2.26E+06 | 1.28E+06 | 7.13E-01 |
| Q92522                                                                                                                                                                                           | 5.24E+07 | 8.18E+06 | 1.19E+08 | 5.72E+06 | 0.00E+00 | 1.09E+07 | 0.00E+00 | 8.25E+06 | 4.42E+07 | 0.00E+00 | 1.03E+07 | 1.32E+07 | 0.00E+00 | 4.70E+07 | 1.10E+07 | 3.10E+07 | 2.26E+07 | 2.56E+07 | 1.96E+07 | 3.13E+07 | 4.15E+07 | 1.87E+07 | 7.14E-01 |          |
| Q99798;A2A274                                                                                                                                                                                    | 4.01E+08 | 5.02E+08 | 1.80E+08 | 2.88E+08 | 4.65E+08 | 7.38E+07 | 5.66E+08 | 4.55E+08 | 2.12E+08 | 3.93E+08 | 3.16E+08 | 2.16E+08 | 4.53E+08 | 2.10E+08 | 5.28E+08 | 3.84E+08 | 3.53E+08 | 3.66E+08 | 3.39E+08 | 1.43E+08 | 1.71E+08 | 1.21E+08 | 7.14E-01 |          |

|                                                                                 |          |          |          |          |          |          |          |          |          |          |          |          |          |          |          |          |          |          |          |          |          |          |          |          |
|---------------------------------------------------------------------------------|----------|----------|----------|----------|----------|----------|----------|----------|----------|----------|----------|----------|----------|----------|----------|----------|----------|----------|----------|----------|----------|----------|----------|----------|
| P13639                                                                          | 1.83E+07 | 1.27E+07 | 1.46E+07 | 7.83E+06 | 1.01E+07 | 1.71E+07 | 1.38E+07 | 1.38E+07 | 1.55E+07 | 2.02E+07 | 5.61E+06 | 1.36E+07 | 8.97E+06 | 1.23E+07 | 1.63E+07 | 9.74E+06 | 1.31E+07 | 1.35E+07 | 1.28E+07 | 3.95E+06 | 3.41E+06 | 4.64E+06 | 7.19E-01 |          |
| Q9UJZ1:A0A087WYB4;Q9UJZ1-2                                                      | 0.00E+00 | 8.82E+06 | 0.00E+00 | 4.59E+06 | 1.82E+07 | 8.97E+06 | 1.17E+07 | 1.29E+07 | 5.39E+06 | 7.00E+06 | 6.83E+06 | 0.00E+00 | 1.31E+07 | 0.00E+00 | 1.41E+07 | 1.03E+07 | 7.61E+06 | 8.15E+06 | 7.08E+06 | 5.69E+06 | 6.36E+06 | 5.32E+06 | 7.20E-01 |          |
| Q01518;Q01518-2;Q5TOR7;Q5TOR6;Q5TOR5;Q5TOR4;Q5TOR3;Q5TOR2;Q5TOR1;Q5TOR9         | 1.66E+07 | 0.00E+00 | 0.00E+00 | 2.48E+07 | 0.00E+00 | 2.64E+07 | 1.31E+07 | 0.00E+00 | 0.00E+00 | 2.88E+07 | 0.00E+00 | 0.00E+00 | 2.11E+07 | 0.00E+00 | 1.41E+07 | 0.00E+00 | 9.05E+06 | 1.01E+07 | 8.00E+06 | 1.13E+07 | 1.16E+07 | 1.17E+07 | 7.23E-01 |          |
| F8VZJ2;H0YHX9;Q13765;E9PAV3-2;E9PAV3;F8W0W4;F8W1N5;F8VNW4                       | 1.06E+07 | 0.00E+00 | 5.43E+06 | 6.55E+06 | 0.00E+00 | 1.91E+07 | 1.36E+07 | 2.07E+07 | 5.36E+06 | 7.03E+06 | 3.56E+06 | 1.28E+07 | 7.59E+06 | 0.00E+00 | 1.42E+07 | 1.57E+07 | 8.89E+06 | 9.50E+06 | 8.28E+06 | 6.63E+06 | 7.94E+06 | 5.51E+06 | 7.27E-01 |          |
| P54819-2;F8W1A4;P54819;F8VZG5;F8VY04;P54819-3;P54819-6;P54819-5;P54819-4;G3V213 | 1.74E+07 | 0.00E+00 | 0.00E+00 | 0.00E+00 | 1.04E+07 | 1.52E+07 | 8.09E+06 | 1.15E+07 | 1.65E+07 | 1.52E+07 | 0.00E+00 | 6.92E+06 | 0.00E+00 | 1.36E+07 | 0.00E+00 | 0.00E+00 | 7.18E+06 | 7.83E+06 | 6.53E+06 | 7.08E+06 | 7.07E+06 | 7.52E+06 | 7.28E-01 |          |
| F8W914;Q9NQC3-2;Q9NQC3-5;Q9NQC3-3;H7C106                                        | 0.00E+00 | 0.00E+00 | 0.00E+00 | 0.00E+00 | 7.15E+07 | 0.00E+00 | 0.00E+00 | 0.00E+00 | 0.00E+00 | 3.88E+07 | 0.00E+00 | 0.00E+00 | 0.00E+00 | 4.30E+07 | 2.13E+07 | 0.00E+00 | 1.09E+07 | 8.94E+06 | 1.29E+07 | 2.16E+07 | 2.53E+07 | 1.88E+07 | 7.29E-01 |          |
| P02768;H0YA55;P02768-3;A0A087WWT3;P02768-2;C9JKR2;D6RHD5;B7WNR0                 | 0.00E+00 | 0.00E+00 | 0.00E+00 | 0.00E+00 | 0.00E+00 | 0.00E+00 | 0.00E+00 | 5.81E+06 | 0.00E+00 | 0.00E+00 | 0.00E+00 | 0.00E+00 | 0.00E+00 | 0.00E+00 | 0.00E+00 | 3.43E+06 | 5.78E+05 | 7.26E+05 | 4.29E+05 | 1.64E+06 | 2.05E+06 | 1.21E+06 | 7.30E-01 |          |
| Q43143                                                                          | 8.68E+06 | 1.00E+07 | 0.00E+00 | 0.00E+00 | 0.00E+00 | 0.00E+00 | 0.00E+00 | 0.00E+00 | 0.00E+00 | 0.00E+00 | 0.00E+00 | 9.95E+06 | 8.41E+06 | 0.00E+00 | 0.00E+00 | 6.40E+06 | 2.72E+06 | 2.34E+06 | 3.09E+06 | 4.23E+06 | 4.34E+06 | 4.38E+06 | 7.34E-01 |          |
| P61981                                                                          | 0.00E+00 | 0.00E+00 | 0.00E+00 | 0.00E+00 | 0.00E+00 | 5.30E+06 | 0.00E+00 | 0.00E+00 | 0.00E+00 | 0.00E+00 | 0.00E+00 | 8.87E+06 | 0.00E+00 | 0.00E+00 | 0.00E+00 | 0.00E+00 | 8.86E+05 | 6.63E+05 | 1.11E+06 | 2.51E+06 | 1.87E+06 | 3.14E+06 | 7.35E-01 |          |
| Q8NFBV4-6;Q8NFBV4-4;Q8NFBV4                                                     | 0.00E+00 | 0.00E+00 | 0.00E+00 | 0.00E+00 | 0.00E+00 | 0.00E+00 | 7.54E+06 | 0.00E+00 | 0.00E+00 | 0.00E+00 | 0.00E+00 | 0.00E+00 | 0.00E+00 | 0.00E+00 | 0.00E+00 | 4.51E+06 | 7.53E+05 | 9.42E+05 | 5.63E+05 | 2.13E+06 | 2.66E+06 | 1.59E+06 | 7.35E-01 |          |
| P62191-2;P62191                                                                 | 0.00E+00 | 0.00E+00 | 0.00E+00 | 9.83E+06 | 2.36E+07 | 1.40E+07 | 2.02E+07 | 3.29E+07 | 6.21E+06 | 2.38E+07 | 0.00E+00 | 1.07E+07 | 1.93E+07 | 3.03E+07 | 0.00E+00 | 2.70E+07 | 1.36E+07 | 1.26E+07 | 1.47E+07 | 1.19E+07 | 1.24E+07 | 1.21E+07 | 7.39E-01 |          |
| P50395;P50395-2;Q5SX87                                                          | 1.27E+07 | 0.00E+00 | 1.03E+07 | 1.12E+07 | 0.00E+00 | 0.00E+00 | 0.00E+00 | 1.09E+07 | 1.32E+07 | 0.00E+00 | 9.58E+06 | 1.38E+07 | 0.00E+00 | 0.00E+00 | 0.00E+00 | 0.00E+00 | 5.10E+06 | 5.63E+06 | 4.57E+06 | 6.06E+06 | 6.06E+06 | 6.43E+06 | 7.39E-01 |          |
| Q13724-2;Q13724;C9J8D4                                                          | 0.00E+00 | 3.00E+08 | 5.77E+07 | 1.47E+08 | 3.76E+08 | 0.00E+00 | 2.02E+08 | 2.57E+08 | 1.68E+08 | 1.77E+08 | 2.26E+08 | 1.79E+08 | 2.17E+08 | 2.01E+08 | 1.45E+08 | 1.63E+08 | 1.76E+08 | 1.67E+08 | 1.85E+08 | 9.84E+07 | 1.41E+08 | 2.79E+07 | 7.40E-01 |          |
| P22314-2;P22314                                                                 | 2.00E+07 | 3.11E+07 | 3.61E+07 | 0.00E+00 | 0.00E+00 | 1.59E+07 | 2.21E+07 | 2.45E+07 | 0.00E+00 | 1.57E+07 | 0.00E+00 | 2.54E+07 | 4.26E+07 | 0.00E+00 | 4.32E+07 | 4.57E+07 | 2.01E+07 | 1.87E+07 | 2.16E+07 | 1.67E+07 | 1.31E+07 | 2.05E+07 | 7.43E-01 |          |
| Q9HB71;Q9HB71-3                                                                 | 2.56E+07 | 3.05E+07 | 2.83E+07 | 0.00E+00 | 0.00E+00 | 3.98E+07 | 5.38E+07 | 5.49E+07 | 0.00E+00 | 0.00E+00 | 0.00E+00 | 3.77E+07 | 6.91E+07 | 0.00E+00 | 4.80E+07 | 4.52E+07 | 2.70E+07 | 2.91E+07 | 2.50E+07 | 2.41E+07 | 2.10E+07 | 2.81E+07 | 7.46E-01 |          |
| P61019;E9PKL7;P61019-2                                                          | 6.05E+07 | 7.27E+07 | 6.72E+07 | 5.96E+07 | 7.07E+07 | 5.93E+07 | 6.63E+07 | 5.72E+07 | 8.40E+07 | 3.85E+07 | 6.19E+07 | 9.95E+07 | 5.44E+07 | 4.77E+07 | 7.03E+07 | 7.64E+07 | 6.54E+07 | 6.42E+07 | 6.66E+07 | 1.43E+07 | 5.80E+06 | 2.01E+07 | 7.49E-01 |          |
| P22626;P22626-2;A0A087WUI2                                                      | 1.07E+07 | 1.08E+07 | 0.00E+00 | 1.81E+07 | 1.31E+07 | 0.00E+00 | 0.00E+00 | 9.33E+06 | 2.03E+07 | 1.73E+07 | 0.00E+00 | 0.00E+00 | 0.00E+00 | 1.38E+07 | 0.00E+00 | 0.00E+00 | 7.09E+06 | 7.75E+06 | 6.44E+06 | 7.82E+06 | 6.93E+06 | 9.05E+06 | 7.50E-01 |          |
| E9PC52;Q16576;Q16576-2;Q5JP02                                                   | 0.00E+00 | 1.44E+07 | 0.00E+00 | 2.92E+06 | 0.00E+00 | 0.00E+00 | 1.04E+08 | 5.25E+07 | 5.35E+06 | 3.37E+07 | 1.06E+07 | 0.00E+00 | 1.86E+07 | 1.11E+06 | 7.66E+07 | 7.28E+07 | 2.45E+07 | 2.17E+07 | 2.73E+07 | 3.36E+07 | 3.78E+07 | 3.12E+07 | 7.50E-01 |          |
| P53396-2;P53396;P53396-3                                                        | 0.00E+00 | 5.25E+06 | 4.07E+06 | 3.70E+06 | 0.00E+00 | 1.00E+07 | 0.00E+00 | 0.00E+00 | 4.50E+06 | 7.32E+06 | 0.00E+00 | 0.00E+00 | 2.47E+06 | 0.00E+00 | 0.00E+00 | 4.54E+06 | 2.62E+06 | 2.88E+06 | 2.35E+06 | 3.15E+06 | 3.62E+06 | 2.83E+06 | 7.51E-01 |          |
| P49915;P49915-2                                                                 | 0.00E+00 | 0.00E+00 | 0.00E+00 | 0.00E+00 | 0.00E+00 | 1.49E+07 | 5.45E+06 | 0.00E+00 | 0.00E+00 | 6.74E+06 | 0.00E+00 | 0.00E+00 | 0.00E+00 | 7.89E+06 | 0.00E+00 | 0.00E+00 | 2.19E+06 | 2.55E+06 | 1.83E+06 | 4.35E+06 | 5.35E+06 | 3.40E+06 | 7.54E-01 |          |
| Q96199;H0Y852;E9PDQ8;Q96199-2                                                   | 0.00E+00 | 0.00E+00 | 0.00E+00 | 0.00E+00 | 6.62E+06 | 7.39E+06 | 0.00E+00 | 5.27E+06 | 0.00E+00 | 0.00E+00 | 0.00E+00 | 0.00E+00 | 4.87E+06 | 1.40E+07 | 0.00E+00 | 5.92E+06 | 2.75E+06 | 2.41E+06 | 3.10E+06 | 4.16E+06 | 3.38E+06 | 5.04E+06 | 7.54E-01 |          |
| A0A087WTV6;Q96C36;A0A087WZR9;J3KR12                                             | 0.00E+00 | 2.20E+07 | 0.00E+00 | 5.61E+07 | 2.81E+07 | 0.00E+00 | 5.32E+07 | 2.80E+07 | 4.42E+07 | 0.00E+00 | 2.06E+07 | 4.18E+07 | 2.22E+07 | 4.64E+07 | 1.69E+07 | 2.03E+07 | 2.50E+07 | 2.34E+07 | 2.66E+07 | 1.92E+07 | 2.28E+07 | 1.62E+07 | 7.57E-01 |          |
| P23246-2;P23246                                                                 | 0.00E+00 | 0.00E+00 | 0.00E+00 | 0.00E+00 | 0.00E+00 | 0.00E+00 | 3.66E+06 | 0.00E+00 | 0.00E+00 | 0.00E+00 | 0.00E+00 | 0.00E+00 | 2.31E+06 | 0.00E+00 | 0.00E+00 | 0.00E+00 | 3.73E+05 | 4.57E+05 | 2.89E+05 | 1.05E+06 | 1.29E+06 | 8.18E+05 | 7.60E-01 |          |
| P56537;B7ZBH1;P56537-2                                                          | 0.00E+00 | 0.00E+00 | 0.00E+00 | 0.00E+00 | 0.00E+00 | 0.00E+00 | 0.00E+00 | 2.25E+06 | 0.00E+00 | 0.00E+00 | 0.00E+00 | 0.00E+00 | 0.00E+00 | 0.00E+00 | 0.00E+00 | 3.56E+06 | 0.00E+00 | 3.63E+05 | 2.82E+05 | 4.44E+05 | 1.02E+06 | 7.96E+05 | 1.26E+06 | 7.61E-01 |









|                                                                                                                             |          |          |          |          |          |          |          |          |          |          |          |          |          |          |          |          |          |          |          |          |          |          |          |          |
|-----------------------------------------------------------------------------------------------------------------------------|----------|----------|----------|----------|----------|----------|----------|----------|----------|----------|----------|----------|----------|----------|----------|----------|----------|----------|----------|----------|----------|----------|----------|----------|
| Q92688-2;Q92688;Q5T6W8                                                                                                      | 0.00E+00 | 0.00E+00 | 0.00E+00 | 0.00E+00 | 0.00E+00 | 0.00E+00 | 1.37E+07 | 1.67E+07 | 0.00E+00 | 0.00E+00 | 0.00E+00 | 0.00E+00 | 1.88E+07 | 0.00E+00 | 0.00E+00 | 1.46E+07 | 3.98E+06 | 3.80E+06 | 4.17E+06 | 7.20E+06 | 7.08E+06 | 7.80E+06 | 9.22E-01 |          |
| Q04760-2;Q04760                                                                                                             | 0.00E+00 | 0.00E+00 | 0.00E+00 | 1.10E+07 | 1.89E+07 | 1.29E+07 | 9.65E+06 | 1.13E+07 | 0.00E+00 | 0.00E+00 | 0.00E+00 | 1.66E+07 | 1.70E+07 | 0.00E+00 | 1.43E+07 | 1.28E+07 | 7.78E+06 | 7.96E+06 | 7.59E+06 | 7.44E+06 | 7.14E+06 | 8.22E+06 | 9.24E-01 |          |
| Q15366-6;Q15366-3;Q15366;Q15366-2;F8VXH9;Q15366-7;F8VZX2;Q15366-8;Q15366-4;Q15366-5;F8W0G4;H3BRU6                           | 3.83E+06 | 0.00E+00 | 0.00E+00 | 0.00E+00 | 0.00E+00 | 0.00E+00 | 0.00E+00 | 3.73E+06 | 0.00E+00 | 0.00E+00 | 0.00E+00 | 4.46E+06 | 0.00E+00 | 0.00E+00 | 0.00E+00 | 3.81E+06 | 9.90E+05 | 9.46E+05 | 1.03E+06 | 1.78E+06 | 1.75E+06 | 1.92E+06 | 9.25E-01 |          |
| Q4TT38;Q13084;A2IDC6                                                                                                        | 0.00E+00 | 4.94E+06 | 4.76E+06 | 0.00E+00 | 0.00E+00 | 0.00E+00 | 0.00E+00 | 0.00E+00 | 0.00E+00 | 0.00E+00 | 0.00E+00 | 0.00E+00 | 0.00E+00 | 0.00E+00 | 5.06E+06 | 5.51E+06 | 1.27E+06 | 1.21E+06 | 1.32E+06 | 2.27E+06 | 2.25E+06 | 2.45E+06 | 9.27E-01 |          |
| P26639;P26639-2                                                                                                             | 0.00E+00 | 0.00E+00 | 0.00E+00 | 0.00E+00 | 0.00E+00 | 1.19E+07 | 9.83E+06 | 9.53E+06 | 0.00E+00 | 0.00E+00 | 0.00E+00 | 8.09E+06 | 7.67E+06 | 0.00E+00 | 9.69E+06 | 7.62E+06 | 4.02E+06 | 3.91E+06 | 4.13E+06 | 4.81E+06 | 5.44E+06 | 4.47E+06 | 9.29E-01 |          |
| O75489                                                                                                                      | 7.00E+07 | 3.85E+07 | 5.67E+07 | 2.88E+07 | 3.50E+07 | 1.99E+07 | 2.68E+07 | 1.18E+07 | 6.06E+07 | 4.40E+07 | 5.60E+07 | 8.52E+06 | 3.72E+06 | 5.68E+07 | 2.54E+07 | 2.51E+07 | 3.55E+07 | 3.59E+07 | 3.50E+07 | 2.02E+07 | 1.92E+07 | 2.24E+07 | 9.29E-01 |          |
| Q92945;A0A087WTP3;M0R015                                                                                                    | 0.00E+00 | 6.49E+06 | 0.00E+00 | 0.00E+00 | 0.00E+00 | 0.00E+00 | 0.00E+00 | 0.00E+00 | 0.00E+00 | 0.00E+00 | 0.00E+00 | 0.00E+00 | 5.71E+06 | 0.00E+00 | 0.00E+00 | 0.00E+00 | 7.63E+05 | 8.11E+05 | 7.14E+05 | 2.09E+06 | 2.29E+06 | 2.02E+06 | 9.30E-01 |          |
| B1AK87;P47756-2;P47756;B1AK88;B1AK85                                                                                        | 0.00E+00 | 0.00E+00 | 0.00E+00 | 0.00E+00 | 0.00E+00 | 7.68E+06 | 1.40E+07 | 1.96E+07 | 0.00E+00 | 1.79E+07 | 0.00E+00 | 0.00E+00 | 0.00E+00 | 1.13E+07 | 0.00E+00 | 1.48E+07 | 5.33E+06 | 5.16E+06 | 5.51E+06 | 7.54E+06 | 7.80E+06 | 7.80E+06 | 9.30E-01 |          |
| Q05639                                                                                                                      | 0.00E+00 | 0.00E+00 | 0.00E+00 | 0.00E+00 | 0.00E+00 | 6.51E+06 | 0.00E+00 | 6.21E+06 | 0.00E+00 | 0.00E+00 | 0.00E+00 | 0.00E+00 | 0.00E+00 | 7.12E+06 | 0.00E+00 | 4.60E+06 | 1.53E+06 | 1.59E+06 | 1.46E+06 | 2.77E+06 | 2.95E+06 | 2.79E+06 | 9.32E-01 |          |
| Q9H3N1;G3V448                                                                                                               | 0.00E+00 | 0.00E+00 | 0.00E+00 | 4.97E+07 | 8.66E+07 | 5.38E+07 | 0.00E+00 | 0.00E+00 | 3.29E+07 | 0.00E+00 | 0.00E+00 | 6.26E+07 | 3.57E+07 | 6.98E+07 | 0.00E+00 | 0.00E+00 | 2.44E+07 | 2.38E+07 | 2.51E+07 | 3.10E+07 | 3.45E+07 | 2.95E+07 | 9.33E-01 |          |
| P16435;E7EMD0;H0Y4R2                                                                                                        | 0.00E+00 | 4.79E+06 | 8.25E+06 | 0.00E+00 | 0.00E+00 | 4.91E+06 | 0.00E+00 | 4.55E+06 | 0.00E+00 | 0.00E+00 | 0.00E+00 | 4.94E+06 | 5.77E+06 | 0.00E+00 | 4.42E+06 | 6.37E+06 | 2.75E+06 | 2.81E+06 | 2.69E+06 | 2.97E+06 | 3.22E+06 | 2.93E+06 | 9.36E-01 |          |
| Q99436                                                                                                                      | 0.00E+00 | 2.38E+07 | 3.95E+07 | 1.90E+07 | 0.00E+00 | 3.04E+07 | 1.53E+07 | 2.49E+07 | 0.00E+00 | 1.61E+07 | 0.00E+00 | 5.12E+07 | 3.68E+07 | 0.00E+00 | 2.37E+07 | 1.98E+07 | 1.88E+07 | 1.91E+07 | 1.84E+07 | 1.59E+07 | 1.39E+07 | 1.88E+07 | 9.36E-01 |          |
| Q15907;P62491-2;H3BMH2;Q15907-2;H3BSC1;P62491                                                                               | 0.00E+00 | 0.00E+00 | 0.00E+00 | 0.00E+00 | 0.00E+00 | 0.00E+00 | 6.07E+06 | 0.00E+00 | 0.00E+00 | 0.00E+00 | 0.00E+00 | 0.00E+00 | 0.00E+00 | 0.00E+00 | 6.80E+06 | 0.00E+00 | 8.05E+05 | 7.59E+05 | 8.50E+05 | 2.20E+06 | 2.15E+06 | 2.40E+06 | 9.38E-01 |          |
| H0YH88;H0YHC3;F8W020;F8W118;F8VX16;F8VUX1;F8VY35;P55209-3;A0A087Y10;F8V59;F8W543;B7ZC2;P55209-2;F8W0J6;F8H4R6;H0YIV4;P55209 | 0.00E+00 | 8.73E+06 | 0.00E+00 | 0.00E+00 | 5.53E+06 | 6.56E+06 | 6.95E+06 | 1.10E+07 | 5.18E+06 | 5.44E+06 | 0.00E+00 | 6.38E+06 | 5.20E+06 | 1.05E+07 | 0.00E+00 | 7.24E+06 | 4.92E+06 | 4.85E+06 | 4.99E+06 | 3.82E+06 | 4.33E+06 | 3.53E+06 | 9.43E-01 |          |
| P05455;E7ERC4;E9PGX9;E9PFL9                                                                                                 | 0.00E+00 | 0.00E+00 | 0.00E+00 | 0.00E+00 | 0.00E+00 | 0.00E+00 | 5.29E+06 | 5.82E+06 | 0.00E+00 | 0.00E+00 | 0.00E+00 | 0.00E+00 | 0.00E+00 | 0.00E+00 | 4.37E+06 | 7.50E+06 | 1.44E+06 | 1.39E+06 | 1.48E+06 | 2.63E+06 | 2.57E+06 | 2.87E+06 | 9.46E-01 |          |
| Q7L014                                                                                                                      | 1.01E+07 | 0.00E+00 | 0.00E+00 | 0.00E+00 | 0.00E+00 | 0.00E+00 | 0.00E+00 | 0.00E+00 | 0.00E+00 | 1.11E+07 | 0.00E+00 | 0.00E+00 | 0.00E+00 | 0.00E+00 | 0.00E+00 | 0.00E+00 | 1.33E+06 | 1.26E+06 | 1.39E+06 | 3.63E+06 | 3.57E+06 | 3.93E+06 | 9.47E-01 |          |
| Q9Y305-2;Q9Y305;Q9Y305-4;Q9Y305-3                                                                                           | 0.00E+00 | 0.00E+00 | 0.00E+00 | 0.00E+00 | 0.00E+00 | 0.00E+00 | 4.24E+06 | 0.00E+00 | 0.00E+00 | 0.00E+00 | 0.00E+00 | 0.00E+00 | 3.89E+06 | 0.00E+00 | 0.00E+00 | 0.00E+00 | 5.09E+05 | 5.31E+05 | 4.86E+05 | 1.39E+06 | 1.50E+06 | 1.38E+06 | 9.52E-01 |          |
| O00203-3;O00203                                                                                                             | 1.04E+07 | 1.54E+07 | 1.38E+07 | 1.47E+07 | 0.00E+00 | 0.00E+00 | 0.00E+00 | 0.00E+00 | 0.00E+00 | 2.67E+07 | 2.59E+07 | 0.00E+00 | 0.00E+00 | 0.00E+00 | 0.00E+00 | 0.00E+00 | 6.68E+06 | 6.79E+06 | 6.58E+06 | 9.74E+06 | 7.41E+06 | 1.22E+07 | 9.66E-01 |          |
| P31948;P31948-2;P31948-3;F5H783                                                                                             | 0.00E+00 | 2.05E+07 | 0.00E+00 | 0.00E+00 | 0.00E+00 | 1.94E+07 | 4.53E+07 | 3.28E+07 | 0.00E+00 | 0.00E+00 | 0.00E+00 | 0.00E+00 | 2.55E+07 | 2.41E+07 | 3.90E+07 | 3.24E+07 | 1.49E+07 | 1.48E+07 | 1.51E+07 | 1.66E+07 | 1.77E+07 | 1.68E+07 | 9.67E-01 |          |
| D6RAN4;P32969;H0Y9V9;E7ESE0                                                                                                 | 5.97E+06 | 0.00E+00 | 0.00E+00 | 0.00E+00 | 0.00E+00 | 0.00E+00 | 0.00E+00 | 0.00E+00 | 0.00E+00 | 6.33E+06 | 0.00E+00 | 0.00E+00 | 0.00E+00 | 0.00E+00 | 0.00E+00 | 0.00E+00 | 7.69E+05 | 7.46E+05 | 7.92E+05 | 2.10E+06 | 2.11E+06 | 2.24E+06 | 9.67E-01 |          |
| P11166;C9JIM8                                                                                                               | 3.82E+07 | 2.99E+07 | 4.67E+07 | 3.04E+07 | 2.45E+07 | 6.31E+07 | 2.89E+07 | 4.20E+07 | 4.69E+07 | 2.98E+07 | 3.08E+07 | 7.88E+07 | 3.09E+07 | 0.00E+00 | 4.40E+07 | 3.96E+07 | 3.78E+07 | 3.80E+07 | 3.76E+07 | 1.73E+07 | 1.26E+07 | 2.20E+07 | 9.69E-01 |          |
| Q13162;H7C3T4                                                                                                               | 0.00E+00 | 0.00E+00 | 7.88E+06 | 0.00E+00 | 1.24E+07 | 0.00E+00 | 9.59E+06 | 0.00E+00 | 0.00E+00 | 0.00E+00 | 0.00E+00 | 5.74E+06 | 0.00E+00 | 5.86E+06 | 0.00E+00 | 1.07E+07 | 8.38E+06 | 3.78E+06 | 3.74E+06 | 3.83E+06 | 4.69E+06 | 5.30E+06 | 4.37E+06 | 9.70E-01 |
| Q99832-3;Q99832;Q99832-4;Q99832-2                                                                                           | 0.00E+00 | 0.00E+00 | 0.00E+00 | 0.00E+00 | 0.00E+00 | 1.46E+07 | 0.00E+00 | 0.00E+00 | 0.00E+00 | 0.00E+00 | 0.00E+00 | 0.00E+00 | 0.00E+00 | 0.00E+00 | 1.38E+07 | 0.00E+00 | 1.78E+06 | 1.82E+06 | 1.73E+06 | 4.86E+06 | 5.16E+06 | 4.89E+06 | 9.70E-01 |          |
| C9JH92;A6NP24;Q08257-3;Q08257                                                                                               | 1.57E+07 | 0.00E+00 | 1.31E+07 | 2.29E+07 | 7.64E+06 | 1.44E+07 | 1.85E+07 | 2.16E+07 | 1.82E+07 | 1.23E+07 | 1.85E+07 | 1.29E+07 | 2.14E+07 | 1.40E+07 | 0.00E+00 | 1.55E+07 | 1.42E+07 | 1.42E+07 | 1.41E+07 | 6.80E+06 | 7.54E+06 | 6.50E+06 | 9.71E-01 |          |

|                                                                     |          |          |          |          |          |          |          |          |          |          |          |          |          |          |          |          |          |          |          |          |          |          |          |
|---------------------------------------------------------------------|----------|----------|----------|----------|----------|----------|----------|----------|----------|----------|----------|----------|----------|----------|----------|----------|----------|----------|----------|----------|----------|----------|----------|
| P04844-2;P04844;Q5JYR7;Q5JYR4                                       | 2.92E+07 | 4.32E+07 | 3.44E+07 | 4.90E+07 | 6.94E+07 | 5.20E+07 | 0.00E+00 | 2.90E+07 | 2.97E+07 | 4.65E+07 | 4.47E+07 | 2.96E+07 | 4.77E+07 | 2.82E+07 | 4.23E+07 | 3.51E+07 | 3.81E+07 | 3.83E+07 | 3.80E+07 | 1.51E+07 | 2.05E+07 | 8.21E+06 | 9.71E-01 |
| A0A087WTT1;P11940-2;P11940;E7EQV3;E7ERJ7;H0YAR2;Q9H361              | 1.13E+07 | 0.00E+00 | 0.00E+00 | 2.30E+07 | 1.18E+07 | 1.75E+07 | 1.47E+07 | 1.74E+07 | 8.23E+06 | 1.03E+07 | 1.92E+07 | 0.00E+00 | 2.21E+07 | 2.39E+07 | 0.00E+00 | 1.31E+07 | 1.20E+07 | 1.20E+07 | 1.21E+07 | 8.49E+06 | 8.25E+06 | 9.29E+06 | 9.71E-01 |
| Q9H9B4;S4R2X2;D6RFI0;D6RDG7                                         | 4.58E+07 | 3.39E+07 | 5.06E+07 | 0.00E+00 | 0.00E+00 | 6.42E+07 | 6.76E+07 | 6.97E+07 | 0.00E+00 | 2.01E+07 | 2.40E+07 | 7.83E+07 | 6.11E+07 | 0.00E+00 | 5.44E+07 | 8.97E+07 | 4.12E+07 | 4.15E+07 | 4.09E+07 | 3.06E+07 | 2.83E+07 | 3.47E+07 | 9.74E-01 |
| P51149;C9J592;C9J8S3                                                | 0.00E+00 | 1.38E+07 | 0.00E+00 | 0.00E+00 | 0.00E+00 | 1.11E+07 | 1.33E+07 | 1.25E+07 | 0.00E+00 | 0.00E+00 | 0.00E+00 | 0.00E+00 | 1.88E+07 | 0.00E+00 | 1.64E+07 | 1.45E+07 | 6.27E+06 | 6.33E+06 | 6.21E+06 | 7.52E+06 | 6.81E+06 | 8.65E+06 | 9.75E-01 |
| J3KTF8;P52565;J3QX2;J3KRE2                                          | 1.46E+07 | 0.00E+00 | 0.00E+00 | 1.13E+07 | 1.03E+07 | 1.06E+07 | 0.00E+00 | 1.26E+07 | 0.00E+00 | 1.28E+07 | 0.00E+00 | 1.77E+07 | 0.00E+00 | 2.76E+07 | 0.00E+00 | 0.00E+00 | 7.34E+06 | 7.41E+06 | 7.27E+06 | 8.54E+06 | 6.28E+06 | 1.08E+07 | 9.75E-01 |
| P48735;P48735-2;H0YL11                                              | 0.00E+00 | 0.00E+00 | 0.00E+00 | 9.90E+06 | 1.08E+07 | 8.95E+06 | 0.00E+00 | 0.00E+00 | 0.00E+00 | 9.21E+06 | 9.02E+06 | 0.00E+00 | 0.00E+00 | 6.16E+06 | 0.00E+00 | 5.86E+06 | 3.74E+06 | 3.71E+06 | 3.78E+06 | 4.54E+06 | 5.14E+06 | 4.21E+06 | 9.75E-01 |
| Q9UJS0;Q9UJS0-2                                                     | 8.47E+06 | 1.35E+07 | 1.33E+07 | 6.14E+06 | 6.14E+06 | 0.00E+00 | 7.92E+06 | 9.01E+06 | 1.33E+07 | 0.00E+00 | 0.00E+00 | 1.21E+07 | 9.72E+06 | 1.05E+07 | 8.18E+06 | 1.01E+07 | 8.02E+06 | 8.05E+06 | 7.98E+06 | 4.59E+06 | 4.31E+06 | 5.16E+06 | 9.75E-01 |
| Q8IZL8;C9JFV4;E7EV54;I3L445                                         | 1.03E+07 | 0.00E+00 | 0.00E+00 | 0.00E+00 | 0.00E+00 | 1.05E+07 | 1.84E+07 | 8.13E+06 | 1.81E+07 | 0.00E+00 | 0.00E+00 | 1.03E+07 | 0.00E+00 | 0.00E+00 | 1.02E+07 | 7.97E+06 | 5.87E+06 | 5.92E+06 | 5.82E+06 | 6.70E+06 | 6.99E+06 | 6.87E+06 | 9.77E-01 |
| Q3ZCQ8;Q3ZCQ8-2;MOR0C3;MOR2F8;Q3ZCQ8-3                              | 0.00E+00 | 0.00E+00 | 0.00E+00 | 0.00E+00 | 0.00E+00 | 9.09E+05 | 0.00E+00 | 0.00E+00 | 0.00E+00 | 0.00E+00 | 0.00E+00 | 9.45E+05 | 0.00E+00 | 0.00E+00 | 0.00E+00 | 0.00E+00 | 1.16E+05 | 1.14E+05 | 1.18E+05 | 3.17E+05 | 3.21E+05 | 3.34E+05 | 9.78E-01 |
| Q16850;C9IYR8;H7C0D0;Q16850-2                                       | 0.00E+00 | 1.43E+07 | 0.00E+00 | 1.11E+07 | 1.89E+07 | 0.00E+00 | 1.60E+07 | 1.96E+07 | 1.05E+07 | 1.34E+07 | 9.66E+06 | 0.00E+00 | 1.14E+07 | 1.08E+07 | 1.20E+07 | 1.14E+07 | 9.96E+06 | 1.00E+07 | 9.91E+06 | 6.58E+06 | 8.69E+06 | 4.16E+06 | 9.79E-01 |
| E9PLK3;P55786;P55786-2                                              | 0.00E+00 | 4.14E+07 | 0.00E+00 | 0.00E+00 | 0.00E+00 | 2.32E+07 | 5.59E+07 | 4.48E+07 | 0.00E+00 | 0.00E+00 | 0.00E+00 | 3.31E+07 | 3.41E+07 | 0.00E+00 | 4.33E+07 | 5.73E+07 | 2.08E+07 | 2.07E+07 | 2.10E+07 | 2.29E+07 | 2.38E+07 | 2.36E+07 | 9.79E-01 |
| P09211;A8MX94                                                       | 0.00E+00 | 0.00E+00 | 0.00E+00 | 0.00E+00 | 0.00E+00 | 8.23E+06 | 0.00E+00 | 0.00E+00 | 0.00E+00 | 0.00E+00 | 0.00E+00 | 0.00E+00 | 0.00E+00 | 0.00E+00 | 0.00E+00 | 7.95E+06 | 1.01E+06 | 1.03E+06 | 9.93E+05 | 2.76E+06 | 2.91E+06 | 2.81E+06 | 9.80E-01 |
| Q6PI48                                                              | 2.30E+07 | 2.91E+07 | 3.03E+07 | 0.00E+00 | 1.82E+07 | 0.00E+00 | 4.21E+07 | 3.91E+07 | 2.93E+07 | 3.93E+07 | 2.44E+07 | 0.00E+00 | 2.09E+07 | 1.56E+07 | 2.51E+07 | 2.58E+07 | 2.26E+07 | 2.27E+07 | 2.26E+07 | 1.34E+07 | 1.60E+07 | 1.14E+07 | 9.80E-01 |
| Q9P2J5;Q9P2J5-2                                                     | 0.00E+00 | 9.27E+06 | 0.00E+00 | 0.00E+00 | 0.00E+00 | 1.50E+07 | 4.16E+07 | 3.39E+07 | 0.00E+00 | 0.00E+00 | 0.00E+00 | 1.86E+07 | 2.56E+07 | 0.00E+00 | 2.37E+07 | 3.32E+07 | 1.26E+07 | 1.25E+07 | 1.26E+07 | 1.49E+07 | 1.67E+07 | 1.41E+07 | 9.82E-01 |
| X6RJP6;P37802;P37802-2                                              | 0.00E+00 | 0.00E+00 | 0.00E+00 | 0.00E+00 | 0.00E+00 | 0.00E+00 | 0.00E+00 | 6.59E+06 | 0.00E+00 | 6.41E+06 | 0.00E+00 | 0.00E+00 | 0.00E+00 | 0.00E+00 | 0.00E+00 | 0.00E+00 | 8.12E+05 | 8.24E+05 | 8.01E+05 | 2.22E+06 | 2.33E+06 | 2.26E+06 | 9.84E-01 |
| O00154-2;K7EKP8;O00154-3;O00154-6;O00154-4;O00154-5;O00154-7;O00154 | 8.48E+07 | 6.13E+07 | 8.14E+07 | 0.00E+00 | 0.00E+00 | 9.53E+07 | 1.09E+08 | 9.80E+07 | 0.00E+00 | 3.05E+07 | 0.00E+00 | 1.66E+08 | 9.92E+07 | 3.70E+07 | 8.16E+07 | 1.19E+08 | 6.65E+07 | 6.62E+07 | 6.67E+07 | 5.04E+07 | 4.32E+07 | 5.99E+07 | 9.84E-01 |
| P48047;H7C0C1                                                       | 0.00E+00 | 0.00E+00 | 0.00E+00 | 0.00E+00 | 0.00E+00 | 2.32E+06 | 0.00E+00 | 0.00E+00 | 0.00E+00 | 0.00E+00 | 0.00E+00 | 0.00E+00 | 0.00E+00 | 2.27E+06 | 0.00E+00 | 0.00E+00 | 2.87E+05 | 2.90E+05 | 2.84E+05 | 7.84E+05 | 8.20E+05 | 8.02E+05 | 9.88E-01 |
| Q9H9J2                                                              | 2.09E+07 | 6.61E+07 | 5.59E+07 | 2.54E+07 | 5.36E+07 | 0.00E+00 | 7.96E+07 | 6.88E+07 | 4.98E+07 | 4.40E+07 | 4.13E+07 | 0.00E+00 | 6.45E+07 | 5.52E+07 | 5.38E+07 | 6.09E+07 | 4.62E+07 | 4.63E+07 | 4.62E+07 | 2.34E+07 | 2.77E+07 | 2.02E+07 | 9.92E-01 |
| P07814;V9GYZ6                                                       | 0.00E+00 | 3.46E+07 | 2.22E+07 | 0.00E+00 | 0.00E+00 | 5.57E+07 | 6.72E+07 | 5.50E+07 | 0.00E+00 | 0.00E+00 | 0.00E+00 | 5.12E+07 | 7.44E+07 | 0.00E+00 | 5.38E+07 | 5.64E+07 | 2.94E+07 | 2.93E+07 | 2.95E+07 | 2.91E+07 | 2.79E+07 | 3.23E+07 | 9.92E-01 |
